# Supplementary material for: Rationale and study protocol of the Physical Activity and Dietary intervention in women with OVArian cancer (PADOVA) study: a randomised controlled trial to evaluate effectiveness of a tailored exercise and dietary intervention on body composition, physical function and fatigue in women with ovarian cancer undergoing chemotherapy
Source: PubMed Central journal article supplement (PMC7643503; doi:10.1136/bmjopen-2020-036854), 2020-11-04
Supplement: bmjopen-2020-036854.draft_revisions.pdf [file bmjopen-2020-036854.draft_revisions.pdf]

# BMJ Open

BMJ Open is committed to open peer review. As part of this commitment we make the peer review history of every article we publish publicly available.

When an article is published we post the peer reviewers' comments and the authors' responses online. We also post the versions of the paper that were used during peer review. These are the versions that the peer review comments apply to.

The versions of the paper that follow are the versions that were submitted during the peer review process. They are not the versions of record or the final published versions. They should not be cited or distributed as the published version of this manuscript.

BMJ Open is an open access journal and the full, final, typeset and author-corrected version of record of the manuscript is available on our site with no access controls, subscription charges or pay-per-view fees (<http://bmjopen.bmj.com>).

If you have any questions on BMJ Open's open peer review process please email [info.bmjopen@bmj.com](mailto:info.bmjopen@bmj.com)

# BMJ Open

**Rationale and design of the Physical Activity and Dietary intervention in women with OVarian cancer (PADOVA) study: A randomised controlled trial to evaluate effectiveness of a tailored exercise and dietary intervention on body composition, physical function and fatigue in patients with ovarian cancer undergoing chemotherapy**

|                               |                                                                                                                                                                                                                                                                                                                                                                                                                                                                                                                                                                                                                                                       |
|-------------------------------|-------------------------------------------------------------------------------------------------------------------------------------------------------------------------------------------------------------------------------------------------------------------------------------------------------------------------------------------------------------------------------------------------------------------------------------------------------------------------------------------------------------------------------------------------------------------------------------------------------------------------------------------------------|
| Journal:                      | <i>BMJ Open</i>                                                                                                                                                                                                                                                                                                                                                                                                                                                                                                                                                                                                                                       |
| Manuscript ID                 | bmjopen-2020-036854                                                                                                                                                                                                                                                                                                                                                                                                                                                                                                                                                                                                                                   |
| Article Type:                 | Protocol                                                                                                                                                                                                                                                                                                                                                                                                                                                                                                                                                                                                                                              |
| Date Submitted by the Author: | 07-Jan-2020                                                                                                                                                                                                                                                                                                                                                                                                                                                                                                                                                                                                                                           |
| Complete List of Authors:     | Stelten, Stephanie; Amsterdam UMC - Locatie VUMC, Epidemiology and Biostatistics<br>Hoedjes, Meeke ; Tilburg University, Medical and Clinical Psychology Kenter, Gemma; Amsterdam UMC - Locatie AMC, Obstetrics and Gynaecology; Amsterdam UMC - Locatie VUMC, Obstetrics and Gynaecology<br>Kampman, Ellen; Wageningen University and Research, Division of Human Nutrition and Health<br>Huijsmans, Rosalie; Amsterdam UMC - Locatie VUMC, Rehabilitation Medicine<br>van Lonkhuijzen, Luc; Amsterdam UMC - Locatie AMC, Obstetrics and Gynaecology<br>Buffart, LM; Amsterdam UMC - Locatie VUMC, Epidemiology & Biostatistics and Medical Oncology |
| Keywords:                     | Nutritional support < ONCOLOGY, Gynaecological oncology < ONCOLOGY, NUTRITION & DIETETICS, SPORTS MEDICINE, REHABILITATION MEDICINE, Epidemiology < ONCOLOGY                                                                                                                                                                                                                                                                                                                                                                                                                                                                                          |
|                               |                                                                                                                                                                                                                                                                                                                                                                                                                                                                                                                                                                                                                                                       |

SCHOLARONE™  
Manuscripts

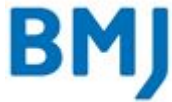

I, the Submitting Author has the right to grant and does grant on behalf of all authors of the Work (as defined in the below author licence), an exclusive licence and/or a non-exclusive licence for contributions from authors who are: i) UK Crown employees; ii) where BMJ has agreed a CC-BY licence shall apply, and/or iii) in accordance with the terms applicable for US Federal Government officers or employees acting as part of their official duties; on a worldwide, perpetual, irrevocable, royalty-free basis to BMJ Publishing Group Ltd ("BMJ") its licensees and where the relevant Journal is co-owned by BMJ to the co-owners of the Journal, to publish the Work in this journal and any other BMJ products and to exploit all rights, as set out in our [licence](#).

The Submitting Author accepts and understands that any supply made under these terms is made by BMJ to the Submitting Author unless you are acting as an employee on behalf of your employer or a postgraduate student of an affiliated institution which is paying any applicable article publishing charge ("APC") for Open Access articles. Where the Submitting Author wishes to make the Work available on an Open Access basis (and intends to pay the relevant APC), the terms of reuse of such Open Access shall be governed by a Creative Commons licence – details of these licences and which [Creative Commons](#) licence will apply to this Work are set out in our licence referred to above.

Other than as permitted in any relevant BMJ Author's Self Archiving Policies, I confirm this Work has not been accepted for publication elsewhere, is not being considered for publication elsewhere and does not duplicate material already published. I confirm all authors consent to publication of this Work and authorise the granting of this licence.

1  
2  
3 1 **Rationale and design of the Physical Activity and Dietary intervention in women with OVArian**  
4 **cancer (PADOVA) study: A randomised controlled trial to evaluate effectiveness of a tailored**  
5 **exercise and dietary intervention on body composition, physical function and fatigue in patients**  
6 **with ovarian cancer undergoing chemotherapy**  
7  
8  
9 4

10  
11 5 S. Stelten<sup>1</sup>, M. Hoedjes<sup>2</sup>, G.G. Kenter<sup>3,4,5</sup>, E. Kampman<sup>6</sup>, R.J. Huijsmans<sup>7</sup>, L.R.C.W. van Lonkhuijzen<sup>4</sup>,  
12 6 L.M. Buffart<sup>1,8</sup>  
13

14  
15  
16 7 *Correspondence*

17 8 Laurien M. Buffart

18 9 De Boelelaan 1089a

19 10 1081 HV Amsterdam, the Netherlands

20 11 E-mail address: [l.buffart@amsterdamumc.nl](mailto:l.buffart@amsterdamumc.nl)

21 12 Tel: +31 20 444 9931  
22  
23

24  
25  
26  
27  
28  
29 14 *Authors affiliations*

30 15 <sup>1</sup>Amsterdam UMC, Vrije Universiteit Amsterdam, Department of Epidemiology and Biostatistics,  
31 16 Amsterdam Public Health research institute, Cancer Center Amsterdam, de Boelelaan 1089a, 1081  
32 17 HV Amsterdam, Netherlands

33 18 <sup>2</sup>Tilburg University, Center of Research on Psychology in Somatic diseases, Department of Medical  
34 19 and Clinical Psychology, Warandelaan 2, 5037 AB Tilburg, Netherlands

35 20 <sup>3</sup>Amsterdam UMC, Vrije Universiteit Amsterdam, Department of Obstetrics and Gynaecology, Cancer  
36 21 Center Amsterdam, Center for Gynaecologic Oncology Amsterdam (CGOA), de Boelelaan 1117, 1081  
37 22 HV Amsterdam, Netherlands

38 23 <sup>4</sup>Amsterdam UMC, Univ(ersity) of Amsterdam, Department of Obstetrics and Gynaecology, Center for  
39 24 Gynaecologic Oncology Amsterdam (CGOA), Meibergdreef 9, 1105 AZ Amsterdam, Netherlands

40 25 <sup>5</sup>The Netherlands Cancer Institute – Antoni van Leeuwenhoek Hospital, Department of Gynaecology,  
41 26 Center for Gynaecologic Oncology Amsterdam (CGOA), Plesmanlaan 121, 1066 CX Amsterdam,  
42 27 Netherlands

43 28 <sup>6</sup>Wageningen University and Research, Division of Human Nutrition and Health, P.O. Box 17, 6700 AA  
44 29 Wageningen, Netherlands

45 30 <sup>7</sup>Amsterdam UMC, Vrije Universiteit van Amsterdam, Department of Rehabilitation Medicine, de

1  
2  
3  
4  
5  
6  
7  
8  
9  
10  
11  
12  
13  
14  
15  
16  
17  
18  
19  
20  
21  
22  
23  
24  
25  
26  
27  
28  
29  
30  
31  
32  
33  
34  
35  
36  
37  
38  
39  
40  
41  
42  
43  
44  
45  
46  
47  
48  
49  
50  
51  
52  
53  
54  
55  
56  
57  
58  
59  
60

- 31 Boelelaan 1117, 1081HV Amsterdam, Netherlands
- 32 <sup>8</sup>Amsterdam UMC, Vrije Universiteit Amsterdam, Department of Medical Oncology, Cancer Center
- 33 Amsterdam, de Boelelaan 1117, 1081 HV Amsterdam, Netherlands
- 34
- 35 Word count: 3785 (excluding title page, abstract, references, figures and tables)

For peer review only

## 36 ABSTRACT

37  
38 **Introduction:** As a consequence of ovarian cancer and its treatment, many women with ovarian cancer  
39 have to deal with fatigue, reduced physical function and loss of weight and/or muscle mass,  
40 compromising quality of life. Exercise and dietary interventions can positively influence body  
41 composition, physical fitness and function and fatigue in patients with cancer. However, there is no data  
42 from randomised controlled trials on the effectiveness of exercise and dietary interventions in patients  
43 with ovarian cancer. Due to a complex disease trajectory, a relatively poor survival and distinct disease-  
44 and treatment-induced side effects, it is unclear whether exercise and dietary interventions that were  
45 shown feasible and effective in other types of cancer produce comparable results in patients with ovarian  
46 cancer. The aim of this paper is to present the design of the multicenter randomised controlled Physical  
47 Activity and Dietary intervention in OVArrian cancer (PADOVA) trial and to describe how the exercise  
48 and dietary intervention is tailored to specific comorbidities, and disease- and treatment induced adverse  
49 effects in patients with ovarian cancer.

50 **Methods and analysis:** Adult women with primary epithelial ovarian cancer who are scheduled to  
51 undergo first-line (neo)adjuvant chemotherapy are randomly allocated to a combined exercise and  
52 dietary intervention or a usual care control group during chemotherapy. Primary outcomes are body  
53 composition, physical function and fatigue. Outcome measures will be assessed before the start of  
54 chemotherapy, three weeks after completion of chemotherapy and 12 weeks later. The exercise and  
55 dietary intervention was tailored to ovarian cancer specific comorbidities and adverse effects of ovarian  
56 cancer and its treatment following the i3-S strategy.

57 **Ethics and dissemination:** This study has been approved by the medical ethical committee of the  
58 Amsterdam UMC (reference: 018). Results of the study will be published in international peer-reviewed  
59 journals.

60 **Trial registration number:** Netherlands Trial register (NTR6300)

### 61 62 **Strengths and limitations of this study**

- 63 • This is a randomised controlled trial in a relatively large group of women with ovarian cancer.
- 64 • Systematic development of the exercise and dietary intervention will improve compliance to the  
65 intervention and prevent drop out.

- 66 • This study will significantly contribute to the scientific evidence on the benefits of exercise and  
67 dietary support in an understudied group of patients.
- 68 • This study offers a combined exercise and dietary intervention and therefore the effects of an  
69 exercise or dietary intervention alone cannot be disentangled.
- 70 • There long-term effectiveness of the intervention may be diluted because the usual care group  
71 will be offered physical activity and dietary counselling after completion of chemotherapy  
72 treatment.

73

## 74 INTRODUCTION

75 Ovarian cancer is the seventh most common type of cancer worldwide, with 239.000 new cases  
76 annually.[1] Ovarian cancer is often diagnosed at an advanced International Federation of Gynaecology  
77 and Obstetrics (FIGO) stage resulting in a poor overall prognosis.[2] The overall 5-year survival rate for  
78 ovarian cancer is 30-40%, but ranges from 92% in patients with FIGO stage I at diagnosis to 29% in  
79 patients with FIGO stage IV.[2]

80 The majority (90%) of malignant ovarian tumors are of epithelial origin.[2] Standard care for epithelial  
81 ovarian cancer includes cytoreductive surgery and platinum- and taxane-based (neo)adjuvant  
82 chemotherapy.[3,4] As a consequence of ovarian cancer and its treatment, many women have physical  
83 and/or psychosocial problems such as fatigue and reduced physical function, compromising quality of  
84 life.[5-14] Additionally, previous studies reported that half of the patients suffer from sarcopenia (i.e. loss  
85 of skeletal muscle mass) at diagnosis and that the prevalence increased during neoadjuvant  
86 chemotherapy.[9,10] Other studies reported that 24-57% were overweight and 10-35% obese.[9,10,15-  
87 19] Independent from Body Mass Index (BMI), risk of malnutrition in patients with ovarian cancer is high.  
88 Studies reported that before start of and during treatment of ovarian cancer 44-67% of patients are  
89 malnourished.[20,21] Observational studies in women with ovarian cancer found that sarcopenia,  
90 overweight and obesity at diagnosis, as well as loss of body weight and muscle mass during treatment,  
91 and underweight after treatment were associated with a lower survival rate.[9-11,15-19,22]  
92 Observational studies among patients with cancer, not including ovarian cancer, have shown that higher  
93 levels of physical activity or physical fitness are associated with better survival.[23,24] Therefore, it may  
94 be important to prevent weight gain or involuntary weight loss, and maintain physical fitness and muscle  
95 mass during treatment.

1  
2  
3 96 Exercise and dietary interventions are both non-pharmacological interventions that can positively  
4  
5 97 influence body composition, physical fitness and function and reduce fatigue in patients with cancer.[25-  
6  
7 98 29] A meta-analysis of intervention studies among the general population[30] as well as the International  
8  
9 99 Society of Sports Nutrition[31] highlight that a combined exercise and dietary intervention is more  
10  
11 100 effective for changing body composition than an exercise or dietary intervention alone. Most previous  
12  
13 101 studies in patients with cancer were conducted in patients with breast cancer. It is unclear whether the  
14  
15 102 effects of exercise and dietary interventions found in patients with breast cancer can be generalized to  
16  
17 103 women with ovarian cancer. Compared with breast cancer, ovarian cancer is often detected in a more  
18  
19 104 advanced stage[32] and in older women. Ovarian cancer also has a substantially different treatment  
20  
21 105 trajectory, i.e. different type of chemotherapy and other adjuvant therapy regimens. A few previous pilot  
22  
23 106 studies have indicated that low-to-moderate intensity exercise interventions[33,34] or a combined  
24  
25 107 exercise and dietary intervention[35] during chemotherapy are feasible in women with ovarian cancer.  
26  
27 108 To date, large randomised controlled trials evaluating the effect of an exercise and dietary intervention  
28  
29 109 during treatment in patients with ovarian cancer are lacking. Therefore, the Physical Activity and Dietary  
30  
31 110 intervention in OVarian cancer (PADOVA) study was initiated. The PADOVA study aims to evaluate the  
32  
33 111 effectiveness of a combined moderate-to-high intensity exercise and dietary intervention during  
34  
35 112 chemotherapy on body composition, physical function, and fatigue as primary outcomes, compared to  
36  
37 113 an usual care control group in women undergoing chemotherapy for ovarian cancer. Secondary  
38  
39 114 outcomes are physical activity and fitness, dietary intake, BMI, patients reported outcomes and  
40  
41 115 treatment toxicity and completion rates. The secondary aim is to conduct an extensive process  
42  
43 116 evaluation to examine how and why the intervention is (in)effective.  
44  
45 117 To optimize intervention feasibility and study retention rates, we aim to offer exercise and dietary  
46  
47 118 interventions that are specifically tailored to the comorbidities, disease- and treatment induced adverse  
48  
49 119 effects that individual patients with ovarian cancer may face. This paper presents the design of the  
50  
51 120 multicenter randomised controlled PADOVA trial, and describes how the combined exercise and dietary  
52  
53 121 intervention can be tailored specifically to patients with ovarian cancer.  
54  
55 122

## 55 123 **METHODS AND ANALYSIS**

57 124 The PADOVA study is a multicenter, single blind, randomised controlled trial. This study is funded by  
58  
59 125 Dutch Cancer Society (VU 2015-7950), sponsored by Amsterdam UMC and approved by the medical  
60



1  
2  
3 126 ethical committee of Amsterdam UMC. Patient inclusion and data collection has started in February  
4  
5 127 2018 and is currently ongoing.  
6

7 128

### 9 129 **Participants**

10 129 **Participants**  
11 130 The study aims to include 122 adult (aged  $\geq 18$  years) women who are scheduled for (neo)adjuvant first-  
12 131 line chemotherapy treatment for primary epithelial ovarian cancer. Patients are excluded from this study  
13 132 when they have had a prior cancer diagnosis within 5 years, are not able to perform basic activities of  
14 133 daily living, have a contraindication for exercise (e.g. heart failure), have a cognitive disorder or severe  
15 134 emotional instability (e.g. schizophrenia, Alzheimer), are unable to read and/or write Dutch or have a life  
16 135 expectancy of less than 3 months. Written informed consent is obtained from all patients prior to  
17 136 participation.  
18  
19  
20  
21  
22  
23  
24

25 137

### 26 138 **Recruitment and randomisation**

27 138 **Recruitment and randomisation**  
28 139 Patients are recruited from the Center of Gynaecologic Oncology Amsterdam, which is a collaboration  
29 140 of all gynaecological oncologists in Amsterdam from Amsterdam UMC and the Netherlands Cancer  
30 141 Institute – Antoni van Leeuwenhoek. After baseline measurement, participants are stratified by FIGO  
31 142 stage (low (I/II) versus high (III/IV stage) and chemotherapy regimen (primary surgery followed by  
32 143 chemotherapy versus neoadjuvant chemotherapy followed by interval debulking and adjuvant  
33 144 chemotherapy) and randomly allocated to either a combined exercise and dietary intervention or a usual  
34 145 care group. An independent researcher performs the randomisation by using a table of random numbers  
35 146 in blocks of four generated by an independent statistician. Allocation sequence was concealed from the  
36 147 research and clinical staff. After randomisation, patients in both the intervention and the control group  
37 148 will receive a brochure on physical activity, diet and body weight recommendations for cancer  
38 149 survivors[36]. Patients who do not wish to participate in the study are invited to complete a single  
39 150 questionnaire examining relevant characteristics and reasons for declining participation to verify  
40 151 representatives of the study population. See Figure 1 for an overview of the study design and  
41 152 procedures.  
42  
43  
44  
45  
46  
47  
48  
49  
50  
51  
52  
53  
54

55 153

### 56 154 **Development and description of the combined exercise and dietary intervention**

57 154 **Development and description of the combined exercise and dietary intervention**  
58 155 The aims of the exercise and dietary intervention are to maintain physical fitness and function, to prevent  
59  
60

1  
2  
3 156 the loss of lean body mass and to maintain a healthy body weight during (neo)adjuvant chemotherapy.  
4  
5 157 The intervention starts at the first cycle of chemotherapy and continues until three weeks after the last  
6  
7 158 cycle (duration of  $\pm 18$  weeks).  
8  
9 159 For optimal intervention feasibility and study retention rates it is important to offer an exercise and dietary  
10  
11 160 intervention in the PADOVA study which is specifically tailored to patients with ovarian cancer. The  
12  
13 161 exercise intervention was based on the exercise intervention that has previously been shown to  
14  
15 162 effectively maintain physical fitness, limit fatigue and enhance quality of life during chemotherapy in  
16  
17 163 patients with breast cancer.[28] The dietary intervention was based on Dutch and international  
18  
19 164 guidelines on general nutritional support for patients with cancer and nutritional support for malnourished  
20  
21 165 patients or patients with ovarian cancer.[37-41] These interventions were tailored via the I3-s strategy  
22  
23 166 to ovarian cancer specific comorbidities, adverse effects of ovarian cancer (e.g. ascites) and its surgical  
24  
25 167 and chemotherapy treatment. The I3-S strategy was introduced in 2015 by Dekker et al.[42] to develop  
26  
27 168 comorbidity-related adaptations to exercise therapy, and has previously been used to tailor exercise  
28  
29 169 interventions to potential comorbidities and adverse effects of breast cancer treatment[43] and patients  
30  
31 170 with knee osteoarthritis.[44]  
32  
33 171 The I3-S strategy consists of four steps, via which relevant information on the specific disease is  
34  
35 172 collected. In the first step, information on comorbidities that occur in patients with ovarian cancer was  
36  
37 173 gathered. All registered comorbidities of patients (n=109) who were treated for ovarian cancer in 2016  
38  
39 174 in the Amsterdam UMC were collected from patients records. Comorbidities were categorized according  
40  
41 175 to International Classification of Diseases, 10th revision[45] (see Table 1 for an overview of all  
42  
43 176 comorbidities).  
44  
45  
46  
47  
48  
49  
50  
51  
52  
53  
54  
55  
56  
57  
58  
59  
60

178 Table 1: Comorbidities in patients with ovarian cancer (N=109)

| Comorbidity                                                                                                                                                         | %  |
|---------------------------------------------------------------------------------------------------------------------------------------------------------------------|----|
| Hypertensive diseases (i.e. hypertension)                                                                                                                           | 28 |
| Ischaemic heart diseases (i.e. angina pectoris, myocardial infarction (>6 months), percutaneous transluminal coronary angioplasty, coronary artery bypass grafting) | 6  |
| Other forms of heart disease (i.e. atrial fibrillation and flutter, other cardiac arrhythmias, heart failure, other forms of heart disease not specified)           | 9  |
| Cerebrovascular diseases (i.e. stroke, not specified as haemorrhage or infarction)                                                                                  | 4  |
| Diseases of arteries, arterioles and capillaries (i.e. aortic aneurysm, peripheral vascular diseases)                                                               | 3  |
| Diseases of veins, lymphatic vessels and lymph nodes, not elsewhere classified (i.e. phlebitis and thrombophlebitis)                                                | 1  |
| Chronic lower respiratory diseases (i.e. chronic obstructive pulmonary disease, asthma)                                                                             | 16 |
| Diabetes Mellitus (unspecified)                                                                                                                                     | 8  |
| Disorders of thyroid gland (i.e. hypothyroidism/hyperthyroidism)                                                                                                    | 6  |
| Disorders of other endocrine glands (i.e. hypoparathyroidism/hyperparathyroidism)                                                                                   | 1  |
| Episodic and paroxysmal disorders (i.e. transient ischaemic attack)                                                                                                 | 1  |
| Other disorders of the nervous system (unspecified) 1                                                                                                               | 1  |
| Dementia in other diseases classified elsewhere (i.e. dementia in Parkinson disease)                                                                                | 1  |
| Diseases of liver (unspecified)                                                                                                                                     | 1  |
| Disorders of gallbladder, biliary tract and pancreas (i.e. cholelithiasis)                                                                                          | 5  |
| Renal failure (unspecified)                                                                                                                                         | 1  |
| Soft tissue disorders (i.e. rheumatism, unspecified)                                                                                                                | 2  |
| Tuberculosis                                                                                                                                                        | 1  |
| Malignant neoplasms (excl. basal cell carcinoma)                                                                                                                    | 7  |

1  
2  
3 179 Comorbidities with a prevalence of  $\geq 5\%$  were included in steps 2-4 of the I3-S strategy. In addition to  
4  
5 180 comorbidities, the potential adverse effects of ovarian cancer and its treatment were added to the  
6  
7 181 inventory. These adverse effects were derived from the literature[46], guidelines[47,48] and expert  
8  
9 182 meetings with (gynaecologic) oncologists. We included the adverse effects (incidence of  $\geq 1\%$ ) of  
10  
11 183 carboplatin and paclitaxel as these are currently the standard chemotherapy treatments of ovarian  
12  
13 184 cancer.[4] In addition, we included all potential adverse effects of surgery and ovarian cancer itself. We  
14  
15 185 focused on potential adverse effects relevant for health-care providers delivering the exercise or dietary  
16  
17 186 interventions. As a consequences, we excluded descriptions of acute adverse effects of chemotherapy  
18  
19 187 monitored by the treating physicians during admission to the hospital. Additionally, we checked overlap  
20  
21 188 of comorbidities and adverse effects of ovarian cancer and its treatment with previously published I3-S  
22  
23 189 papers for knee osteoarthritis[44] and breast cancer[43] or nutritional guidelines.[37-39,41] The following  
24  
25 190 comorbidities (i.e. hypertensive diseases, ischaemic heart diseases, other forms of heart disease,  
26  
27 191 chronic lower respiratory diseases, Diabetes Mellitus), and adverse effects (clinical parameters such as  
28  
29 192 leukopenia/neutropenia, trombopenia, anemia; and symptoms of dyspnea, nausea, vomiting or  
30  
31 193 diarrhea, skin and nail changes, fever, dizziness, decreased or increased heart rate, change in body  
32  
33 194 weight, depression, numbness/loss of sensation, hearing and/or visual impairments, fatigue, pain and  
34  
35 195 chest pain) were described in previous publications[43,44] or nutritional guidelines[37-39,41] and will  
36  
37 196 not be included in this paper.

37  
38 197 In the second and third step, contraindications and restrictions on exercise training were gathered as  
39  
40 198 well as solutions for the exercise training in ovarian cancer specific comorbidities, adverse effects of  
41  
42 199 ovarian cancer and its treatment. This was based on literature[42-44,49], guidelines[38] and/or expert  
43  
44 200 opinions of (gynaecologic) oncologists, physical therapists specialized in oncology.

45  
46 201 In the final step, comorbidities, adverse effects of ovarian cancer and its treatment, but also  
47  
48 202 contraindications and restrictions were translated to clinical parameters and symptoms that can be  
49  
50 203 monitored during the intervention of the PADOVA study. All information was synthesized in a framework  
51  
52 204 (Table 2).

53  
54 205  
55  
56  
57  
58  
59  
60

207 Table 2: framework with alternations for the exercise and dietary intervention

| Comorbidities, adverse effects<br>ovarian cancer or treatment              | Considerations                                                                                                                                                                                                                                                                | Actions/strategy                                                                                                                                                                                                                                                                                                                                                                                                                                                          |
|----------------------------------------------------------------------------|-------------------------------------------------------------------------------------------------------------------------------------------------------------------------------------------------------------------------------------------------------------------------------|---------------------------------------------------------------------------------------------------------------------------------------------------------------------------------------------------------------------------------------------------------------------------------------------------------------------------------------------------------------------------------------------------------------------------------------------------------------------------|
| <i>Comorbidities</i>                                                       |                                                                                                                                                                                                                                                                               |                                                                                                                                                                                                                                                                                                                                                                                                                                                                           |
| Disorders of thyroid gland (i.e. hypothyroidism/hyperthyroidism)           | Consider the following complications of disorders of thyroid gland: <ul style="list-style-type: none"> <li>• Weight loss or weight gain</li> <li>• Bradycardia in hypothyroidism or tachycardia in hyperthyroidism</li> <li>• Low energy/fatigue in hypothyroidism</li> </ul> | <ul style="list-style-type: none"> <li>• Refer to dietitian when weight loss/-gain occurs</li> <li>• Explain to patient brady-/tachycardia due to hypo-/hyperthyroidism</li> <li>• Monitor symptoms: in case of persistent co-existing symptoms (dyspnea, anxiety, fatigue): terminate exercise and refer to physician</li> <li>• Explain to patient fatigue due to hypothyroidism</li> <li>• Refer to physician when fatigue does not reduce in a few weeks</li> </ul>   |
| Disorders of gallbladder, biliary tract and pancreas (i.e. cholelithiasis) |                                                                                                                                                                                                                                                                               | <ul style="list-style-type: none"> <li>• Monitor symptoms and in case of persistent pain: terminate exercise and refer to physician</li> </ul>                                                                                                                                                                                                                                                                                                                            |
| Malignant neoplasms (excl. basal cell carcinoma) <sup>1</sup>              | Consider comorbidities and adverse effects of the malignant neoplasm that might interfere with the intervention                                                                                                                                                               |                                                                                                                                                                                                                                                                                                                                                                                                                                                                           |
| <i>Adverse effects ovarian cancer</i>                                      |                                                                                                                                                                                                                                                                               |                                                                                                                                                                                                                                                                                                                                                                                                                                                                           |
| Ascites (60%)                                                              | Consider the following complications of ascites: <ul style="list-style-type: none"> <li>• Discomfort</li> <li>• Pleural effusion and/or shortness in breath</li> <li>• Diminished nutritional intake</li> </ul>                                                               | <ul style="list-style-type: none"> <li>• Adjust exercise to a comfortable intensity or posture</li> <li>• In case of disproportional dyspnea: terminate exercise session and refer to physician</li> <li>• Refer to dietitian</li> </ul>                                                                                                                                                                                                                                  |
| <i>Adverse effects of chemotherapy and surgery</i>                         |                                                                                                                                                                                                                                                                               |                                                                                                                                                                                                                                                                                                                                                                                                                                                                           |
| Abdominal wound                                                            | Consider the following complications of an abdominal wound:                                                                                                                                                                                                                   | <ul style="list-style-type: none"> <li>• In the post-operative period (4-6 weeks) exercise is allowed, but pressure on the abdomen should be avoided therefore the 'abdominal crunch' and 'pullover' could be replaced with a 'lateral raise' and 'leg extension'</li> <li>• After 4-6 weeks isometric exercises could be replaced by eccentric exercises</li> <li>• Monitor symptoms: in case of pain or discomfort decrease training intensity or resistance</li> </ul> |

|                                                                                                                          |                                                                                                                                                                                                |                                                                                                                                                                                                                                                                                                                                                                                                                                                                                     |
|--------------------------------------------------------------------------------------------------------------------------|------------------------------------------------------------------------------------------------------------------------------------------------------------------------------------------------|-------------------------------------------------------------------------------------------------------------------------------------------------------------------------------------------------------------------------------------------------------------------------------------------------------------------------------------------------------------------------------------------------------------------------------------------------------------------------------------|
|                                                                                                                          | <ul style="list-style-type: none"> <li>Fever &gt;38.5 degrees Celsius due to wound infection</li> </ul>                                                                                        | <ul style="list-style-type: none"> <li>Contra-indication for exercise, refer to physician</li> </ul>                                                                                                                                                                                                                                                                                                                                                                                |
| Intestinal stoma                                                                                                         | <p>Consider the following complications of an intestinal stoma</p> <ul style="list-style-type: none"> <li>High output stoma (production of &gt;1 liter per 24 hour during ≥ 3 days)</li> </ul> | <ul style="list-style-type: none"> <li>See recommendation under 'abdominal wound'</li> <li>Avoid contact sport (e.g. football or martial arts)</li> <li>Contra-indication for exercise, refer to physician and/or dietitian</li> </ul>                                                                                                                                                                                                                                              |
| (Risk of) lymphedema in legs                                                                                             | <p>Consider the following complications of lymphedema in legs:</p> <ul style="list-style-type: none"> <li>Numbness/loss of sensation</li> </ul>                                                | <ul style="list-style-type: none"> <li>Monitor leg volume during exercise program; ask for symptoms of lymphedema</li> <li>Refer to lymphedema specialist when lymphedema is present, or when leg volumes increases and symptoms arise (advice on how to progress with exercise)</li> <li>Be careful with exercises that include walking, running or balance to prevent falls</li> <li>Advise patient to wear good fitting, stable footwear with good grip under surface</li> </ul> |
| Deep vein thrombosis (in leg)                                                                                            |                                                                                                                                                                                                | <ul style="list-style-type: none"> <li>Contra-indication for exercise, refer to a physician when the following symptoms occur: pain in the leg, red or discolored skin, or a feeling of warmth</li> </ul>                                                                                                                                                                                                                                                                           |
| Thrombophlebitis                                                                                                         |                                                                                                                                                                                                | <ul style="list-style-type: none"> <li>Avoid pressure or impact on affected area</li> <li>Monitor symptoms and in case of pain or discomfort decrease training intensity or resistance</li> </ul>                                                                                                                                                                                                                                                                                   |
| Nervousness/confusion                                                                                                    | <p>Consider the following cause of nervousness/confusion</p> <ul style="list-style-type: none"> <li>Sever anxiety or a psychiatric disorder</li> </ul>                                         | <ul style="list-style-type: none"> <li>Give the patient time to discuss feelings or thoughts</li> <li>Contra-indication for exercise, refer to a physician when a serious psychiatric disorder might be present</li> </ul>                                                                                                                                                                                                                                                          |
| Gastro-intestinal symptoms (i.e. anorexia, dyspepsia, constipation, taste disorder, dry mouth, mouth ulcers, stomatitis) | <p>Consider the following complications of gastro-intestinal symptoms:</p> <ul style="list-style-type: none"> <li>Diminished nutritional intake</li> </ul>                                     | <ul style="list-style-type: none"> <li>Refer to dietitian and/or physician</li> </ul>                                                                                                                                                                                                                                                                                                                                                                                               |
| Melaena                                                                                                                  |                                                                                                                                                                                                | <ul style="list-style-type: none"> <li>Contra-indication for exercise, refer to a physician</li> </ul>                                                                                                                                                                                                                                                                                                                                                                              |

208 <sup>1</sup> Patients with a current other malignancy or prior diagnosis (within 5 years) of cancer were excluded from participation in the PADOVA study

### 209 **Exercise intervention**

210 The exercise intervention consists of two one-hour exercise sessions per week including moderate-to-  
211 high intensity resistance and aerobic exercises. The exercise sessions are supervised by a physical  
212 therapist specifically trained in treating oncology patients.

213 The sessions start with a warming up of 10 minutes. Resistance exercises targeting six large muscle  
214 groups are conducted for 20 minutes per session, with two series of eight repetitions at 70-80%  
215 (gradually increasing per week in between one repetition maximum testing) of the one repetition  
216 maximum. Prescribed exercises include vertical row, leg press, bench press, pull over, abdominal  
217 crunch and lunge. However, due to the abdominal wound in the post-operative period (4-6 weeks)  
218 patients are not allowed to perform eccentric exercises with the abdominal muscles. Additionally,  
219 patients are not allowed to put pressure on the abdomen and should therefore avoid heavy lifting and  
220 exercises such as the abdominal crunch and pullover. Exercises with an isometric use of the abdominal  
221 muscles such as a lateral raise or leg extensions, are an alternative. An overview of all adaptations for  
222 patients with ovarian cancer are shown in Table 2. One repetition maximum testing will be repeated  
223 every three weeks to ensure adequate training intensity. Aerobic exercises are conducted for 30 minutes  
224 per session, with an intensity of 50-80% of the maximal work load as estimated by the steep ramp  
225 test[50] and if needed adjusted if the Borg Scale of perceived exertion decreases to a score of 12 or  
226 lower or increases to a score of 16 or higher.[51] In addition to the supervised sessions, patients are  
227 encouraged to be physically active on at least three additional days a week for 30 minutes to meet the  
228 recommended physical activity levels.[40]

### 229 **Dietary intervention**

230 The dietary intervention is based on the dietary guideline set by the World Cancer Research Fund  
231 (WCRF)/American Institute for Cancer Research (AICR)[40] and an sufficient total protein intake of at  
232 least 1.2 grams of protein per kg body weight per day[41,52] and 25 grams of protein per meal, since  
233 such evenly distributed protein intake is expected to optimize muscle protein synthesis.[53] The  
234 intervention is provided by experienced oncology dietitians once every three weeks during face-to-face  
235 sessions of 30-45 minutes each at the hospital or by telephone using motivational interviewing  
236 techniques.[54] During the first session, patients will receive feedback on their body weight, Body Mass  
237 Index (BMI), body composition assessed via bio-electric impedance analysis (BIA), diet quality, and on  
238 the extent to which they meet the protein goals and WCRF/AICR dietary recommendations. Counselling

239 is tailored to the nutritional needs of each individual patient according to body composition, nutritional  
 240 status and dietary intake during chemotherapy. Patients who are (at risk of) malnutrition are primarily  
 241 counselled for prevention of weight loss by maintaining sufficient caloric intake, particularly protein  
 242 intake. Patients who are not at risk of developing malnutrition are primarily counselled to meet the dietary  
 243 guidelines set by the WCRF/AICR.

244

### 245 **Control group**

246 Women in the control group will receive usual care during chemotherapy, which does not include  
 247 structured exercise and/or dietary counselling. They are offered a maximum of three exercise and three  
 248 dietary counselling sessions in twelve weeks after completion of chemotherapy.

249

### 250 **Outcome measurements**

251 An investigator blinded from group allocation conducts measurements at three time points. Participants  
 252 are instructed not to reveal their group allocation. Baseline measurements are conducted before  
 253 randomisation and the start of chemotherapy (T0), the second measurement three weeks after  
 254 completion of chemotherapy (T1) and the last measurement (T2) twelve weeks later. An overview of all  
 255 outcome measurements is presented in Table 3.

256 *Table 3: Summary of outcome measurements*

| Outcome                   | Instrument                                                                                                                                                              | T0 | T1 | T2 |
|---------------------------|-------------------------------------------------------------------------------------------------------------------------------------------------------------------------|----|----|----|
| <i>Primary outcomes</i>   |                                                                                                                                                                         |    |    |    |
| Body composition          | Computed tomography imaging for the assessment of skeletal muscle area                                                                                                  | X  | X  |    |
|                           | Bio-electric impedance analysis for the assessment of fat mass                                                                                                          | X  | X  | X  |
| Physical fatigue          | Multidimensional Fatigue Inventory[1]                                                                                                                                   | X  | X  | X  |
| Physical function         | European Organisation Research and Treatment of Cancer-Quality of life questionnaire-Core 30[2]                                                                         | X  | X  | X  |
| <i>Secondary outcomes</i> |                                                                                                                                                                         |    |    |    |
| Physical activity         | Accelerometer (Actigraph) for objective measurement of physical activity in seven consecutive days during all waking hours                                              | X  | X  | X  |
|                           | Physical Activity Scale for the Elderly[3] for self-reported levels of physical activity                                                                                | X  | X  | X  |
| Physical fitness          | Maximum oxygen uptake (peak VO <sub>2</sub> ) during a maximum exercise test on a cycle ergometer using a ramp protocol for the assessment of cardiorespiratory fitness | X  | X  | X  |
|                           | Hand held dynamometer for the assessment of muscle strength                                                                                                             | X  | X  | X  |



|                                                              |                                                                                                                                                                                                                    |   |   |   |
|--------------------------------------------------------------|--------------------------------------------------------------------------------------------------------------------------------------------------------------------------------------------------------------------|---|---|---|
| Body Mass Index                                              | Body height on a calibrated scale to the nearest 0.1 mm                                                                                                                                                            | X | X | X |
|                                                              | Body weight on a calibrated scale to the nearest 0.1 kg                                                                                                                                                            | X | X | X |
| Dietary intake;<br>WCRF/AICR guidelines                      | Food frequency questionnaire (developed by Wageningen University)                                                                                                                                                  | X | X | X |
| Dietary intake; protein intake                               | Self-composed food frequency questionnaire                                                                                                                                                                         | X | X | X |
| Health-related quality of life and symptoms                  | European Organisation Research and Treatment of Cancer-Quality of life questionnaire – Ovarian cancer (OV28)[4]                                                                                                    | X | X | X |
|                                                              | European Organisation Research and Treatment of Cancer-Quality of life questionnaire - Chemotherapy-induced peripheral neuropathy (CIPN20)[5]                                                                      | X | X | X |
|                                                              | Hospital Anxiety and Depression Scale[6]                                                                                                                                                                           | X | X | X |
|                                                              | Pittsburgh Sleep Quality Index[7]                                                                                                                                                                                  | X | X | X |
| Chemotherapy therapy completion rates and treatment toxicity | Medical records of which chemotherapy completion rates will be assessed as the relative dose intensity, i.e., the amount of particular chemotherapy given in relation to the originally planned chemotherapy dose. |   | X |   |
| <i>Other study parameters</i>                                |                                                                                                                                                                                                                    |   |   |   |
| Blood sampling                                               | Venous blood sample (40 ml)                                                                                                                                                                                        | X | X |   |
| Smoking and sociodemographics                                | Self-composed questionnaire                                                                                                                                                                                        | X |   |   |
| Contamination of control group <sup>1</sup>                  | Self-composed questionnaire                                                                                                                                                                                        |   | X |   |

<sup>1</sup> Parameter will only be assessed in the control group

257

258

### 259 Primary outcomes

260 Primary outcomes are body composition, physical function and fatigue. Body composition is assessed  
 261 via skeletal muscle area and fat mass. Skeletal muscle area is assessed at T0 and T1 using routine  
 262 computed tomography (CT) imaging (first image extending from the third lumbar vertebra to iliac crest)  
 263 conducted for diagnostic purposes. CT is considered the gold standard for assessment of muscle mass  
 264 in cancer patients.[55] Because the CT of the third lumbar vertebra is not yet validated for the  
 265 assessment of body fat mass,[56] fat mass is assessed with a non-invasive measurement BIA.[57]  
 266 Physical function is assessed using the physical function subscale of the validated European  
 267 Organisation Research and Treatment of Cancer-Quality of life questionnaire-Core 30 (EORTC QLQ-  
 268 C30).[58] Physical fatigue is assessed with the physical fatigue subscale of the Multidimensional Fatigue  
 269 Inventory (MFI).[59]

270

### 271 Secondary outcomes

1  
2  
3 272 Secondary outcomes are physical activity, physical fitness (i.e. cardiorespiratory fitness and muscle  
4  
5 273 strength), dietary intake, BMI, health-related quality of life and symptoms of neuropathy, anxiety and  
6  
7 274 depression, sleep disturbances, chemotherapy treatment toxicity and completion rates. The  
8  
9 275 measurement instruments for the assessment of the secondary outcomes are presented in Table 3.

#### 11 276 **Other study parameters**

13 277 In addition, during the visit on T0 and T1, a venous blood sample is drawn and stored in a biobank for  
14  
15 278 future biomarker studies. Covariates such as clinical data (e.g. cancer subtype, FIGO stage) and  
16  
17 279 sociodemographic characteristics (e.g. age, ethnicity) are assessed at baseline. Contamination (i.e.  
18  
19 280 received supervised exercise and/or dietary counselling) of the control group is assessed by a  
20  
21 281 questionnaire at T1.

22  
23 282

#### 25 283 **Process evaluation**

26  
27 284 An extensive process evaluation is conducted using a mixed-method approach (using both quantitative  
28  
29 285 and qualitative research methods). Quantitative data on behavioral counselling skills of dietitians will be  
30  
31 286 assessed during counselling sessions with the Behavior Change Counselling Inventory (BECCI).[60] In  
32  
33 287 patients in the intervention group, the Health Care Climate Questionnaire (HCCQ) will additionally be  
34  
35 288 used to assess the extent to which an autonomy supportive environment was perceived during  
36  
37 289 counseling.[61] Quantitative data on potential mediating effects of behavioral determinants of physical  
38  
39 290 activity and dietary behavior (i.e. outcome expectations, self-efficacy for eating and exercise habits,  
40  
41 291 sociostructural factors, stage of change, type of motivation and knowledge) are assessed on T0, T1 and  
42  
43 292 T2 by questionnaires in all patients. The following process evaluation components are examined by  
44  
45 293 physical therapists and dietitians and involved in the exercise or dietary intervention via a report form:  
46  
47 294 dose delivered, dose received and fidelity. Acceptability of the intervention is assessed by a  
48  
49 295 questionnaire in patients and a semi-structured interview in patients, physical therapists and dietitians.  
50  
51 296 The semi-structured interviews in patients and healthcare professionals are conducted by a researcher.  
52  
53 297 Interviews will be transcribed verbatim, coded in several phases[62,63] and then analyzed with a  
54  
55 298 qualitative data analysis program. Analyses are partly performed concurrently with data collection  
56  
57 299 because the interviews will be held until data saturation is reached. An overview of all measurement  
58  
59 300 instruments for the process evaluation is presented in Table 4.

60 301

302 Table 4: Overview of all measurement instruments for the process evaluation

| Outcome                                    | Instrument                                                                                           | T0                         | T1             | T2             |
|--------------------------------------------|------------------------------------------------------------------------------------------------------|----------------------------|----------------|----------------|
| <i>Process evaluation</i>                  |                                                                                                      |                            |                |                |
| Behavioral determinants                    | Multidimensional Outcome Expectations for Exercise Scale[3]                                          | X                          | X              | X              |
|                                            | Self-efficacy for eating and exercise habits – self-composed items                                   | X                          | X              | X              |
|                                            | Sociostructural factors, self-composed items                                                         | X                          | X              | X              |
|                                            | Stage of change[8]                                                                                   | X                          | X              | X              |
|                                            | Type of motivation: Treatment Self-Regulation Questionnaire[9]                                       | X                          | X              | X              |
|                                            | Knowledge (on WCRF recommendations): Items used in previous study[10]                                | X                          | X              | X              |
| Acceptability of intervention              | Self-composed items <sup>1</sup>                                                                     |                            | X              |                |
|                                            | The Health Care Climate Questionnaire – short form (6 items)[11]                                     |                            | X              |                |
| Acceptability of intervention              | Semi-structured interviews in healthcare professionals <sup>2</sup>                                  |                            | X <sup>1</sup> | X <sup>4</sup> |
|                                            | Semi-structured interviews in participants                                                           |                            | X <sup>1</sup> | X <sup>4</sup> |
| Dose delivered                             | Checklist <sup>2</sup> – Amount of (components of) sessions provided by physical therapist/dietitian | Daily, during intervention |                |                |
| Dose received                              | Checklist <sup>2</sup> – Amount of (components of) sessions participants actively engaged in         | Daily, during intervention |                |                |
| Fidelity                                   | Checklist <sup>2</sup> – Extend to which the intervention was executed as prescribed in the protocol | Daily, during intervention |                |                |
| Behavioral counselling skills <sup>3</sup> | Behavior Change Counselling Inventory[12]                                                            | During intervention        |                |                |

303 <sup>1</sup> Parameters will only be assessed in intervention group

304 <sup>2</sup> Parameter will be examined in physical therapists and dietitians

305 <sup>3</sup> Parameter will be examined in dietitians

306 <sup>4</sup> Parameter will only be assessed in the control group

307

### 308 Sample size calculation

309 Sample size calculation was based on the results of a previous RCT among patients with breast cancer  
 310 that evaluated the effects of a combined aerobic and resistance exercise intervention (similar to the  
 311 PADOVA study),[28] and a pilot study among patients with ovarian cancer that evaluated the feasibility  
 312 of an exercise intervention.[34] With 53 patients per study-arm, we are able to detect a clinically relevant  
 313 between group difference in effects directly post-intervention on physical function (10 points), physical  
 314 fatigue (2.7 points), body composition (effect size 0.55 in percentage body fat), and 10-15% difference  
 315 in peak oxygen uptake[64] (alpha=0.05; power= 0.80). Taking into account a dropout of 15%, we aim to  
 316 include 61 patients per group.

317

### 318 Statistical analysis

319 The primary analysis focuses on the effects of the intervention directly after completion of chemotherapy  
 320 (T1), since both the intervention and control group have received counselling from a physical therapist

1  
2  
3 321 and/or dietitian at follow-up (T2). Data will be analysed according to the intention-to-treat principle.  
4 322 Intervention effects (at T1) will be assessed using linear regression analysis for continuous outcomes,  
5 323 by regressing the intervention on post-test value (T1) of the outcome, adjusting for baseline values (T0).  
6 324 To examine whether intervention effects on body composition, physical function or fatigue are mediated  
7 325 by changes in physical activity and fitness, and/or diet, a series of regression analysis according to the  
8 326 product-of-coefficients test will be conducted.[65] Potential effect modification by relevant demographic  
9 327 (e.g. age) and clinical (e.g. cancer stage, treatment regimen) variables will be explored by adding the  
10 328 variable and its interaction term with the intervention into the regression model.  
11  
12  
13  
14  
15

## 16 330 **DISCUSSION**

17 331 This paper presents the rationale and design of the PADOVA study and the procedure of tailoring an  
18 332 exercise and dietary intervention to patients with ovarian cancer. The PADOVA study aims to examine  
19 333 the effectiveness of a combined exercise and dietary intervention on body composition, physical function  
20 334 and fatigue in patients with ovarian cancer during chemotherapy. Additionally, during the PADOVA  
21 335 study, an extensive process evaluation is conducted to examine the effective and ineffective  
22 336 components of the intervention. This large randomised controlled trial significantly contributes to the  
23 337 scientific evidence on the potential benefits of exercise and dietary support in an understudied group of  
24 338 patients with cancer who often face a complex and unfavourable disease trajectory.

25 339 A strength of this study is its randomized controlled design in a relatively large group of women with  
26 340 ovarian cancer and the systematic development of the exercise and dietary intervention by the I3-S  
27 341 strategy to ensure adequate tailoring of the intervention to this patient specific group. Because the  
28 342 intervention is adjusted to comorbidities, disease- and treatment induced effects, we expect compliance  
29 343 to the intervention to be high and drop out to be low. Another strength is the process evaluation because  
30 344 it retrieves information on how and why the intervention is (un)successful.[66] With this information the  
31 345 exercise and dietary intervention will be improved before the combined intervention is implemented in  
32 346 clinical practice.

33 347 Aiming to maximize benefits on body composition, we combined an exercise and dietary intervention.  
34 348 Consequently, we are unable to disentangle the effects of the exercise and dietary intervention.  
35 349 However, we plan to perform a mediation analysis to explore whether the intervention effects on body  
36 350 composition can be explained by changes in exercise or dietary components. Another limitation of this  
37 351 study is its inability to study long-term effects of the intervention compared to the control group. In the  
38 352 PADOVA study, exercise and dietary counselling will be offered to the control group after the first follow  
39 353 up in order to prevent nonparticipation and dropout and to limit contamination (exercise and dietary  
40 354 intervention) in the control group during chemotherapy. Therefore we expect smaller differences  
41 355 between groups at follow-up (T2).

42 356 This study will contribute to the evidence on the benefits of an exercise and dietary intervention in  
43 357 patients with ovarian cancer. If proven effective, a combined exercise and dietary intervention for  
44 358 patients with ovarian cancer can be implemented in clinical practice.  
45  
46  
47  
48  
49  
50  
51  
52

## 53 359 54 360 **Patient and public involvement**

1  
2  
3 361 Patients were involved in the development of study specific patient information and they were asked to  
4 362 assess the burden of time required to participate in this study. The opinion of patients has been  
5 363 considered to improve the readability of the patient information sheets on the study. During the study  
6 364 patients will be interviewed, as part of the process evaluation, to improve the intervention. This  
7 365 information could be important for implementation of the intervention in clinical practice. Study results  
8 366 will be presented to patients in collaboration with the patient community.

### 367 **Ethics and dissemination**

368 This study has been approved by the medical ethical committee of the Amsterdam UMC (reference:  
369 018). Additional approval was obtained for the participating hospitals. The trial is registered in the  
370 Netherlands Trial Register. Signed informed consent is required of all included participants. Results of  
371 the study will be published in international peer-reviewed journals.

372

### 373 **Acknowledgements**

374 Not applicable.

375

### 376 **Contributors**

377 EK, GGK, LMB and MH conceived the study. GGK, LMB, LRCWL, MH and SS designed the study.  
378 LMB, MH, RJH and SS designed the intervention. LMB, MH and SS wrote the manuscript. All authors  
379 read and approved the final manuscript.

380

### 381 **Funding**

382 The PADOVA study is funded by the Dutch Cancer Society, grant number VU 2015-7950. The Dutch  
383 Cancer Society was not involved in the design of the study, the collection, analysis and interpretation of  
384 data, nor in writing the manuscript.

385

### 386 **Competing interests**

387 The authors declare that they have no competing interests.

388

### 389 **Patient consent for publication**

390 Not required.

391

392 **Provenance and peer review**

393 Not commissioned; externally peer reviewed.

394

395 **REFERENCES**

- 396 1. Ferlay J, Soerjomataram I, Dikshit R, et al. Cancer incidence and mortality worldwide: sources, methods and major patterns in GLOBOCAN 2012. *Int J Cancer* 2015;136(5):E359-86. doi: 10.1002/ijc.29210 [published Online First: 2014/09/16]
- 397 2. Reid BM, Permut JB, Sellers TA. Epidemiology of ovarian cancer: a review. *Cancer Biol Med* 2017;14(1):9-32.
- 398 3. Netherlands CCCt. Epithelial Ovarian Carcinoma; National guidelines 2.0. 2012
- 399 4. Group obotEGW, Raja FA, Ledermann JA, et al. Newly diagnosed and relapsed epithelial ovarian carcinoma: ESMO Clinical Practice Guidelines for diagnosis, treatment and follow-up†. *Annals of Oncology* 2013;24(suppl\_6):vi24-vi32. doi: 10.1093/annonc/mdt333
- 400 5. Holzner B, Kemmler G, Meraner V, et al. Fatigue in ovarian carcinoma patients: a neglected issue? *Cancer* 2003;97(6):1564-72. doi: 10.1002/cncr.11253 [published Online First: 2003/03/11]
- 401 6. Meraner V, Gamper EM, Grahmann A, et al. Monitoring physical and psychosocial symptom trajectories in ovarian cancer patients receiving chemotherapy. *BMC Cancer* 2012;12:77. doi: 10.1186/1471-2407-12-77 [published Online First: 2012/03/01]
- 402 7. von Gruenigen VE, Huang HQ, Gil KM, et al. Assessment of factors that contribute to decreased quality of life in Gynecologic Oncology Group ovarian cancer trials. *Cancer* 2009;115(20):4857-64. doi: 10.1002/cncr.24520 [published Online First: 2009/08/20]
- 403 8. Kayl AE, Meyers CA. Side-effects of chemotherapy and quality of life in ovarian and breast cancer patients. *Curr Opin Obstet Gynecol* 2006;18(1):24-8. doi: 10.1097/01.gco.0000192996.20040.24 [published Online First: 2006/02/24]
- 404 9. Rutten IJ, van Dijk DP, Kruitwagen RF, et al. Loss of skeletal muscle during neoadjuvant chemotherapy is related to decreased survival in ovarian cancer patients. *J Cachexia Sarcopenia Muscle* 2016;7(4):458-66. doi: 10.1002/jcsm.12107 [published Online First: 2016/04/01]
- 405 10. Kumar A, Moynagh MR, Multinu F, et al. Muscle composition measured by CT scan is a measurable predictor of overall survival in advanced ovarian cancer. *Gynecol Oncol* 2016;142(2):311-6. doi: 10.1016/j.ygyno.2016.05.027
- 406 11. Mardas M, Stelmach-Mardas M, Madry R. Body weight changes in patients undergoing chemotherapy for ovarian cancer influence progression-free and overall survival. *Support Care Cancer* 2017;25(3):795-800. doi: 10.1007/s00520-016-3462-1
- 407 12. von Gruenigen VE, Frasure HE, Jenison EL, et al. Longitudinal assessment of quality of life and lifestyle in newly diagnosed ovarian cancer patients: the roles of surgery and chemotherapy. *Gynecol Oncol* 2006;103(1):120-6. doi: 10.1016/j.ygyno.2006.01.059 [published Online First: 2006/03/25]
- 408 13. Gil KM, Gibbons HE, Jenison EL, et al. Baseline characteristics influencing quality of life in women undergoing gynecologic oncology surgery. *Health Qual Life Outcomes* 2007;5:25. doi: 10.1186/1477-7525-5-25 [published Online First: 2007/05/19]
- 409 14. Wenzel L, Huang HQ, Monk BJ, et al. Quality-of-life comparisons in a randomized trial of interval secondary cytoreduction in advanced ovarian carcinoma: a Gynecologic Oncology Group study. *J Clin Oncol* 2005;23(24):5605-12. doi: 10.1200/jco.2005.08.147 [published Online First: 2005/08/20]
- 410 15. Kumar A, Bakkum-Gamez JN, Weaver AL, et al. Impact of obesity on surgical and oncologic outcomes in ovarian cancer. *Gynecol Oncol* 2014;135(1):19-24. doi: 10.1016/j.ygyno.2014.07.103 [published Online First: 2014/08/12]
- 411 16. Pavelka JC, Brown RS, Karlan BY, et al. Effect of obesity on survival in epithelial ovarian cancer. *Cancer* 2006;107(7):1520-4. doi: 10.1002/cncr.22194 [published Online First: 2006/08/31]
- 412 17. Aust S, Knogler T, Pils D, et al. Skeletal Muscle Depletion and Markers for Cancer Cachexia Are Strong Prognostic Factors in Epithelial Ovarian Cancer. *PLoS One* 2015;10(10):e0140403. doi: 10.1371/journal.pone.0140403
- 413 18. Bandera EV, Lee VS, Rodriguez-Rodriguez L, et al. Impact of Chemotherapy Dosing on Ovarian Cancer Survival According to Body Mass Index. *JAMA Oncol* 2015;1(6):737-45. doi: 10.1001/jamaoncol.2015.1796 [published Online First: 2015/07/17]

- 1  
2  
3 445 19. Kim SI, Kim HS, Kim TH, et al. Impact of underweight after treatment on prognosis of advanced-  
4 446 stage ovarian cancer. *J Immunol Res* 2014;2014:349546. doi: 10.1155/2014/349546 [published  
5 447 Online First: 2014/07/23]
- 6 448 20. Mardas M, Jamka M, Madry R, et al. Dietary habits changes and quality of life in patients  
7 449 undergoing chemotherapy for epithelial ovarian cancer. *Support Care Cancer* 2015;23(4):1015-23.  
8 450 doi: 10.1007/s00520-014-2462-2 [published Online First: 2014/10/02]
- 9 451 21. Laky B, Janda M, Bauer J, et al. Malnutrition among gynaecological cancer patients. *Eur J Clin*  
10 452 *Nutr* 2007;61(5):642-6. doi: 10.1038/sj.ejcn.1602540
- 11 453 22. Hess LM, Barakat R, Tian C, et al. Weight change during chemotherapy as a potential prognostic  
12 454 factor for stage III epithelial ovarian carcinoma: a Gynecologic Oncology Group study. *Gynecol Oncol*  
13 455 2007;107(2):260-5. doi: 10.1016/j.ygyno.2007.06.010 [published Online First: 2007/08/07]
- 14 456 23. Schmid D, Leitzmann MF. Cardiorespiratory fitness as predictor of cancer mortality: a systematic  
15 457 review and meta-analysis. *Annals of oncology : official journal of the European Society for Medical*  
16 458 *Oncology* 2015;26(2):272-8. doi: 10.1093/annonc/mdu250 [published Online First: 2014/07/11]
- 17 459 24. McTiernan A, Friedenreich CM, Katzmarzyk PT, et al. Physical Activity in Cancer Prevention and  
18 460 Survival: A Systematic Review. *Med Sci Sports Exerc* 2019;51(6):1252-61. doi:  
19 461 10.1249/mss.0000000000001937 [published Online First: 2019/05/17]
- 20 462 25. Padilha CS, Marinello PC, Galvao DA, et al. Evaluation of resistance training to improve muscular  
21 463 strength and body composition in cancer patients undergoing neoadjuvant and adjuvant therapy: a  
22 464 meta-analysis. *J Cancer Surviv* 2017;11(3):339-49. doi: 10.1007/s11764-016-0592-x [published  
23 465 Online First: 2017/01/06]
- 24 466 26. Cohen CW, Fontaine KR, Arend RC, et al. A Ketogenic Diet Reduces Central Obesity and Serum  
25 467 Insulin in Women with Ovarian or Endometrial Cancer. *J Nutr* 2018;148(8):1253-60. doi:  
26 468 10.1093/jn/nxy119 [published Online First: 2018/08/24]
- 27 469 27. Kampshoff CS, Chinapaw MJ, Brug J, et al. Randomized controlled trial of the effects of high  
28 470 intensity and low-to-moderate intensity exercise on physical fitness and fatigue in cancer survivors:  
29 471 results of the Resistance and Endurance exercise After ChemoTherapy (REACT) study. *BMC Med*  
30 472 2015;13:275. doi: 10.1186/s12916-015-0513-2 [published Online First: 2015/10/31]
- 31 473 28. van Waart H, Stuiver MM, van Harten WH, et al. Effect of Low-Intensity Physical Activity and  
32 474 Moderate- to High-Intensity Physical Exercise During Adjuvant Chemotherapy on Physical Fitness,  
33 475 Fatigue, and Chemotherapy Completion Rates: Results of the PACES Randomized Clinical Trial. *J*  
34 476 *Clin Oncol* 2015;33(17):1918-27. doi: 10.1200/jco.2014.59.1081 [published Online First: 2015/04/29]
- 35 477 29. Demark-Wahnefried W, Morey MC, Sloane R, et al. Reach out to enhance wellness home-based  
36 478 diet-exercise intervention promotes reproducible and sustainable long-term improvements in health  
37 479 behaviors, body weight, and physical functioning in older, overweight/obese cancer survivors. *J Clin*  
38 480 *Oncol* 2012;30(19):2354-61. doi: 10.1200/jco.2011.40.0895 [published Online First: 2012/05/23]
- 39 481 30. Johns DJ, Hartmann-Boyce J, Jebb SA, et al. Diet or exercise interventions vs combined  
40 482 behavioral weight management programs: a systematic review and meta-analysis of direct  
41 483 comparisons. *J Acad Nutr Diet* 2014;114(10):1557-68. doi: 10.1016/j.jand.2014.07.005 [published  
42 484 Online First: 2014/09/27]
- 43 485 31. Jager R, Kerksick CM, Campbell BI, et al. International Society of Sports Nutrition Position Stand:  
44 486 protein and exercise. *J Int Soc Sports Nutr* 2017;14:20.
- 45 487 32. Gil KM, von Gruenigen VE. Physical activity and gynecologic cancer survivorship. *Recent Results*  
46 488 *Cancer Res* 2011;186:305-15. doi: 10.1007/978-3-642-04231-7\_13 [published Online First:  
47 489 2010/11/30]
- 48 490 33. Newton MJ, Hayes SC, Janda M, et al. Safety, feasibility and effects of an individualised walking  
49 491 intervention for women undergoing chemotherapy for ovarian cancer: a pilot study. *BMC Cancer*  
50 492 2011;11:389. doi: 10.1186/1471-2407-11-389 [published Online First: 2011/09/09]
- 51 493 34. Mizrahi D, Broderick C, Friedlander M, et al. An Exercise Intervention During Chemotherapy for  
52 494 Women With Recurrent Ovarian Cancer: A Feasibility Study. *Int J Gynecol Cancer* 2015;25(6):985-  
53 495 92. doi: 10.1097/igc.0000000000000460 [published Online First: 2015/04/29]
- 54 496 35. von Gruenigen VE, Frasure HE, Kavanagh MB, et al. Feasibility of a lifestyle intervention for  
55 497 ovarian cancer patients receiving adjuvant chemotherapy. *Gynecol Oncol* 2011;122(2):328-33. doi:  
56 498 10.1016/j.ygyno.2011.04.043 [published Online First: 2011/05/24]
- 57 499 36. Gezond leven na kanker. In: Fonds SWKO, ed.: Wereld Kanker Onderzoeks Fonds, 2017.
- 58 500 37. Oncoline. Algemene voedings- en dieetbehandeling 2017 [updated 01-03-2017. Available from:  
59 501 <https://www.oncoline.nl/voedings-en-dieetbehandeling> accessed 20-08-2018 2018.
- 60 502 38. Oncoline. Eierstokkanker 2017 [updated 01-03-2017. Available from:  
503 503 <https://www.oncoline.nl/voeding-eierstokkanker>.

- 1  
2  
3 504 39. Oncoline. Ondervoeding bij patienten met kanker 2012 [updated 15-01-2012. Available from:  
4 505 <https://www.oncoline.nl/ondervoeding-bij-patienten-met-kanker>.  
5 506  
6 507 40. World Cancer Research Fund / American Institute for Cancer Research. Diet, Nutrition, Physical  
7 508 Activity and Cancer: a Global Perspective. Continuous Update Project Expert report, 2018.  
8 509 41. Arends J, Bachmann P, Baracos V, et al. ESPEN guidelines on nutrition in cancer patients. *Clin*  
9 510 *Nutr* 2016 doi: 10.1016/j.clnu.2016.07.015 [published Online First: 2016/09/18]  
10 511 42. Dekker J, de Rooij M, van der Leeden M. Exercise and comorbidity: the i3-S strategy for  
11 512 developing comorbidity-related adaptations to exercise therapy. *Disabil Rehabil* 2016;38(9):905-9.  
12 513 doi: 10.3109/09638288.2015.1066451  
13 514 43. van der Leeden M, Huijsmans RJ, Geleijn E, et al. Tailoring exercise interventions to  
14 515 comorbidities and treatment-induced adverse effects in patients with early stage breast cancer  
15 516 undergoing chemotherapy: a framework to support clinical decisions. *Disabil Rehabil* 2017:1-11. doi:  
16 517 10.1080/09638288.2016.1260647  
17 518 44. de Rooij M, van der Leeden M, Avezaat E, et al. Development of comorbidity-adapted exercise  
18 519 protocols for patients with knee osteoarthritis. *Clin Interv Aging* 2014;9:829-42.  
19 520 45. Organization WH. International statistical classification of diseases and related health problems  
20 521 (10th revision) [updated 2016. 5:[Available from: <https://icd.who.int/browse10/2016/en2019>.  
21 522 46. Farmacotherapeutisch Kompas: Zorginstituut Nederland; [Available from:  
22 523 <https://farmacotherapeutischkompas.nl> accessed 20-09-2017.  
23 524 47. Oncoline. Epitheliaal ovariumcarcinoom 2.1: Integraal Kankercentrum Nederland; 2018 [updated  
24 525 2018-01-15.  
25 526 48. Oncoline. Ascites, versie 2.0: Integraal Kankercentrum Nederland; 2010 [updated 19-01-2010.  
26 527 49. Klein I, Danzi S. Thyroid Disease and the Heart. *Circulation* 2007;116(15):1725-35. doi:  
27 528 doi:10.1161/CIRCULATIONAHA.106.678326  
28 529 50. De Backer IC, Schep G, Hoogeveen A, et al. Exercise testing and training in a cancer  
29 530 rehabilitation program: the advantage of the steep ramp test. *Arch Phys Med Rehabil*  
30 531 2007;88(5):610-6. doi: 10.1016/j.apmr.2007.02.013 [published Online First: 2007/05/01]  
31 532 51. Borg G. Borg's perceived exertion and pain scales. Champaign, IL, US: Human Kinetics 1998.  
32 533 52. Nitenberg G, Raynard B. Nutritional support of the cancer patient: issues and dilemmas. *Crit Rev*  
33 534 *Oncol Hematol* 2000;34(3):137-68. [published Online First: 2000/06/06]  
34 535 53. Paddon-Jones D, Rasmussen BB. Dietary protein recommendations and the prevention of  
35 536 sarcopenia. *Curr Opin Clin Nutr Metab Care* 2009;12(1):86-90. doi:  
36 537 10.1097/MCO.0b013e32831cef8b [published Online First: 2008/12/06]  
37 538 54. Miller WR, Rollnick S. Ten things that motivational interviewing is not. *Behav Cogn Psychother*  
38 539 2009;37(2):129-40. doi: 10.1017/s1352465809005128 [published Online First: 2009/04/15]  
39 540 55. Prado CM, Birdsell LA, Baracos VE. The emerging role of computerized tomography in assessing  
40 541 cancer cachexia. *Curr Opin Support Palliat Care* 2009;3(4):269-75. doi:  
41 542 10.1097/SPC.0b013e328331124a [published Online First: 2009/08/12]  
42 543 56. Shen W, Punyanitya M, Wang Z, et al. Total body skeletal muscle and adipose tissue volumes:  
43 544 estimation from a single abdominal cross-sectional image. *J Appl Physiol (1985)* 2004;97(6):2333-8.  
44 545 doi: 10.1152/jappphysiol.00744.2004 [published Online First: 2004/08/18]  
45 546 57. Bolanowski M, Nilsson BE. Assessment of human body composition using dual-energy x-ray  
46 547 absorptiometry and bioelectrical impedance analysis. *Medical science monitor : international medical*  
47 548 *journal of experimental and clinical research* 2001;7(5):1029-33. [published Online First: 2001/09/06]  
48 549 58. Aaronson NK, Ahmedzai S, Bergman B, et al. The European Organization for Research and  
49 550 Treatment of Cancer QLQ-C30: a quality-of-life instrument for use in international clinical trials in  
50 551 oncology. *J Natl Cancer Inst* 1993;85(5):365-76. [published Online First: 1993/03/03]  
51 552 59. Smets EM, Garssen B, Bonke B, et al. The Multidimensional Fatigue Inventory (MFI)  
52 553 psychometric qualities of an instrument to assess fatigue. *J Psychosom Res* 1995;39(3):315-25.  
53 554 [published Online First: 1995/04/01]  
54 555 60. Lane C, Huws-Thomas M, Hood K, et al. Measuring adaptations of motivational interviewing: the  
55 556 development and validation of the behavior change counseling index (BECCI). *Patient Educ Couns*  
56 557 2005;56(2):166-73. doi: 10.1016/j.pec.2004.01.003 [published Online First: 2005/01/18]  
57 558 61. Czajkowska Z, Wang H, Hall NC, et al. Validation of the English and French versions of the Brief  
58 559 Health Care Climate Questionnaire. *Health Psychol Open* 2017;4(2):2055102917730675.  
59 560 62. Boeije H. Analysis in qualitative research: Sage 2009.  
60 561 63. Green J, Thorogood N. Qualitative methods for health research: Sage 2013.  
61 562 64. Jones LW, Liang Y, Pituskin EN, et al. Effect of exercise training on peak oxygen consumption  
62 563 in patients with cancer: a meta-analysis. *Oncologist* 2011;16(1):112-20. doi:  
10.1634/theoncologist.2010-0197 [published Online First: 2011/01/08]



- 1  
2  
3 564 65. MacKinnon DP, Fairchild AJ, Fritz MS. Mediation analysis. *Annual review of psychology*  
4 565 2007;58:593-614. doi: 10.1146/annurev.psych.58.110405.085542 [published Online First:  
5 566 2006/09/14]  
6 567 66. Process evaluation for public health interventions and research. San Francisco, CA, US: Jossey-  
7 568 Bass 2002.

8  
9 56910 570 **REFERECENS IN TABLES**

- 11  
12 571 1. Smets EM, Garssen B, Bonke B, et al. The Multidimensional Fatigue Inventory (MFI) psychometric  
13 572 qualities of an instrument to assess fatigue. *J Psychosom Res* 1995;39(3):315-25. [published  
14 573 Online First: 1995/04/01]  
15 574 2. Aaronson NK, Ahmedzai S, Bergman B, et al. The European Organization for Research and  
16 575 Treatment of Cancer QLQ-C30: a quality-of-life instrument for use in international clinical trials in  
17 576 oncology. *J Natl Cancer Inst* 1993;85(5):365-76. [published Online First: 1993/03/03]  
18 577 3. Wojcicki TR, White SM, McAuley E. Assessing outcome expectations in older adults: the  
19 578 multidimensional outcome expectations for exercise scale. *J Gerontol B Psychol Sci Soc Sci*  
20 579 2009;64(1):33-40. doi: 10.1093/geronb/gbn032 [published Online First: 2009/02/03]  
21 580 4. Greimel E, Bottomley A, Cull A, et al. An international field study of the reliability and validity of a  
22 581 disease-specific questionnaire module (the QLQ-OV28) in assessing the quality of life of patients  
23 582 with ovarian cancer. *Eur J Cancer* 2003;39(10):1402-8. [published Online First: 2003/06/27]  
24 583 5. Postma TJ, Aaronson NK, Heimans JJ, et al. The development of an EORTC quality of life  
25 584 questionnaire to assess chemotherapy-induced peripheral neuropathy: the QLQ-CIPN20. *Eur J*  
26 585 *Cancer* 2005;41(8):1135-9. doi: 10.1016/j.ejca.2005.02.012 [published Online First: 2005/05/25]  
27 586 6. Zigmond AS SR. The hospital anxiety and depression scale. *Acta Psychiatr Scand*  
28 587 1983;67(6):361-70.  
29 588 7. Buysse DJ, Reynolds CF, Monk TH, et al. The Pittsburgh sleep quality index: A new instrument  
30 589 for psychiatric practice and research. *Psychiatry Research* 1989;28(2):193-213. doi:  
31 590 [https://doi.org/10.1016/0165-1781\(89\)90047-4](https://doi.org/10.1016/0165-1781(89)90047-4)  
32 591 8. Prochaska JO, Velicer WF. The transtheoretical model of health behavior change. *Am J Health*  
33 592 *Promot* 1997;12(1):38-48. doi: 10.4278/0890-1171-12.1.38 [published Online First: 1997/08/05]  
34 593 9. Levesque CS, Williams GC, Elliot D, et al. Validating the theoretical structure of the Treatment  
35 594 Self-Regulation Questionnaire (TSRQ) across three different health behaviors. *Health Educ Res*  
36 595 2007;22(5):691-702. doi: 10.1093/her/cyl148 [published Online First: 2006/12/02]  
37 596 10. Vrieling A, Visser A, Hoedjes M, et al. Increasing awareness and knowledge of lifestyle  
38 597 recommendations for cancer prevention in Lynch syndrome carriers: Randomized controlled trial.  
39 598 *Clin Genet* 2018;93(1):67-77. doi: 10.1111/cge.13076 [published Online First: 2017/06/21]  
40 600 11. Czajkowska Z, Wang H, Hall NC, et al. Validation of the English and French versions of the Brief  
41 601 Health Care Climate Questionnaire. *Health Psychol Open* 2017;4(2):2055102917730675.  
42 602 12. Lane C, Huws-Thomas M, Hood K, et al. Measuring adaptations of motivational interviewing: the  
43 603 development and validation of the behavior change counseling index (BECCI). *Patient Educ Couns*  
44 604 2005;56(2):166-73. doi: 10.1016/j.pec.2004.01.003 [published Online First: 2005/01/18]

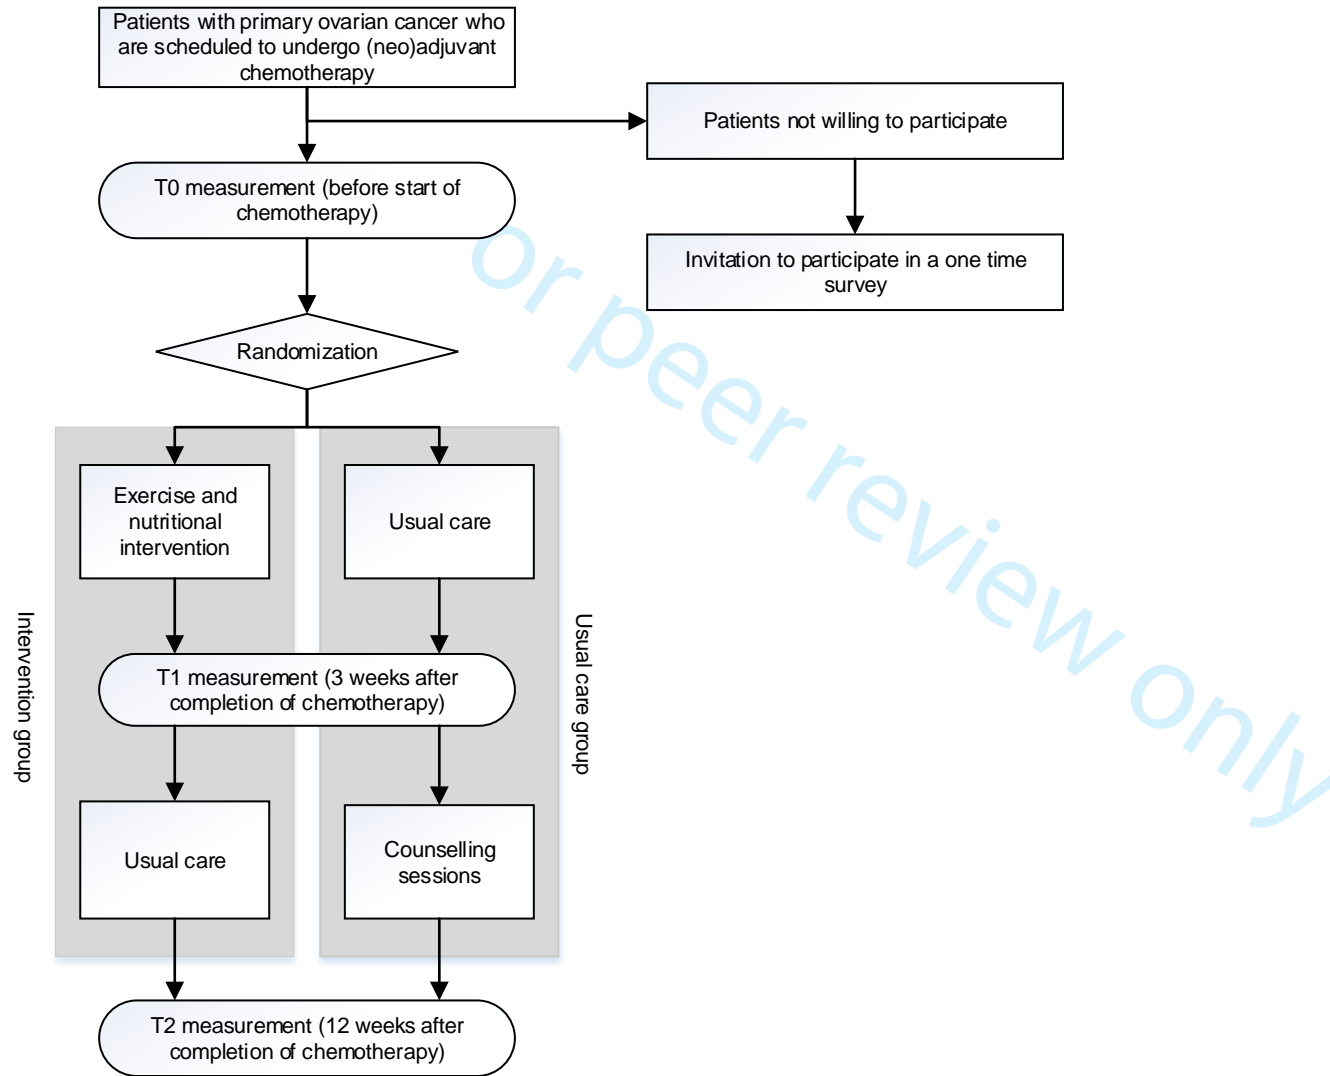

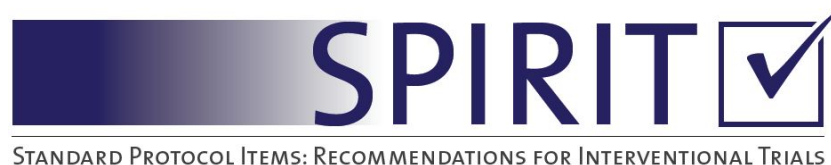

STANDARD PROTOCOL ITEMS: RECOMMENDATIONS FOR INTERVENTIONAL TRIALS

SPIRIT 2013 Checklist: Recommended items to address in a clinical trial protocol and related documents\*

| Section/item                      | Item No | Description                                                                                                                                                                                                                                                                              | Addressed on page number |
|-----------------------------------|---------|------------------------------------------------------------------------------------------------------------------------------------------------------------------------------------------------------------------------------------------------------------------------------------------|--------------------------|
| <b>Administrative information</b> |         |                                                                                                                                                                                                                                                                                          |                          |
| Title                             | 1       | Descriptive title identifying the study design, population, interventions, and, if applicable, trial acronym                                                                                                                                                                             | 1                        |
| Trial registration                | 2a      | Trial identifier and registry name. If not yet registered, name of intended registry                                                                                                                                                                                                     | 3                        |
|                                   | 2b      | All items from the World Health Organization Trial Registration Data Set                                                                                                                                                                                                                 | N/A                      |
| Protocol version                  | 3       | Date and version identifier                                                                                                                                                                                                                                                              | In MEC protocol          |
| Funding                           | 4       | Sources and types of financial, material, and other support                                                                                                                                                                                                                              | 18                       |
| Roles and responsibilities        | 5a      | Names, affiliations, and roles of protocol contributors                                                                                                                                                                                                                                  | 1, 18                    |
|                                   | 5b      | Name and contact information for the trial sponsor                                                                                                                                                                                                                                       | 1                        |
|                                   | 5c      | Role of study sponsor and funders, if any, in study design; collection, management, analysis, and interpretation of data; writing of the report; and the decision to submit the report for publication, including whether they will have ultimate authority over any of these activities | 18                       |
|                                   | 5d      | Composition, roles, and responsibilities of the coordinating centre, steering committee, endpoint adjudication committee, data management team, and other individuals or groups overseeing the trial, if applicable (see Item 21a for data monitoring committee)                         | N/A                      |

1 **Introduction**

2

3 Background and rationale 6a Description of research question and justification for undertaking the trial, including summary of relevant studies (published and unpublished) examining benefits and harms for each intervention 4,5

4

5

6 6b Explanation for choice of comparators 4,5

7

8 Objectives 7 Specific objectives or hypotheses 4,5

9

10 Trial design 8 Description of trial design including type of trial (eg, parallel group, crossover, factorial, single group), allocation ratio, and framework (eg, superiority, equivalence, noninferiority, exploratory) 5,6

11

12

13

14 **Methods: Participants, interventions, and outcomes**

15

16 Study setting 9 Description of study settings (eg, community clinic, academic hospital) and list of countries where data will be collected. Reference to where list of study sites can be obtained 6

17

18

19 Eligibility criteria 10 Inclusion and exclusion criteria for participants. If applicable, eligibility criteria for study centres and individuals who will perform the interventions (eg, surgeons, psychotherapists) 6

20

21

22 Interventions 11a Interventions for each group with sufficient detail to allow replication, including how and when they will be administered 6-13

23

24 11b Criteria for discontinuing or modifying allocated interventions for a given trial participant (eg, drug dose change in response to harms, participant request, or improving/worsening disease) 6-13

25

26 11c Strategies to improve adherence to intervention protocols, and any procedures for monitoring adherence (eg, drug tablet return, laboratory tests) 6-15

27

28 11d Relevant concomitant care and interventions that are permitted or prohibited during the trial N/A

29

30

31

32 Outcomes 12 Primary, secondary, and other outcomes, including the specific measurement variable (eg, systolic blood pressure), analysis metric (eg, change from baseline, final value, time to event), method of aggregation (eg, median, proportion), and time point for each outcome. Explanation of the clinical relevance of chosen efficacy and harm outcomes is strongly recommended 13-16

33

34

35

36

37

38

39

40 Participant timeline 13 Time schedule of enrolment, interventions (including any run-ins and washouts), assessments, and visits for participants. A schematic diagram is highly recommended (see Figure) 6-15, figure 1, table 3 and 4

41

42

43

44

45

46

|   |             |    |                                                                                                                                                                                       |                 |
|---|-------------|----|---------------------------------------------------------------------------------------------------------------------------------------------------------------------------------------|-----------------|
| 1 | Sample size | 14 | Estimated number of participants needed to achieve study objectives and how it was determined, including clinical and statistical assumptions supporting any sample size calculations | 16              |
| 2 |             |    |                                                                                                                                                                                       |                 |
| 3 |             |    |                                                                                                                                                                                       |                 |
| 4 | Recruitment | 15 | Strategies for achieving adequate participant enrolment to reach target sample size                                                                                                   | In MEC protocol |
| 5 |             |    |                                                                                                                                                                                       |                 |

6 **Methods: Assignment of interventions (for controlled trials)**

7 Allocation:

|    |                     |     |                                                                                                                                                                                                                                                                                                                                                          |   |
|----|---------------------|-----|----------------------------------------------------------------------------------------------------------------------------------------------------------------------------------------------------------------------------------------------------------------------------------------------------------------------------------------------------------|---|
| 10 | Sequence generation | 16a | Method of generating the allocation sequence (eg, computer-generated random numbers), and list of any factors for stratification. To reduce predictability of a random sequence, details of any planned restriction (eg, blocking) should be provided in a separate document that is unavailable to those who enrol participants or assign interventions | 6 |
|----|---------------------|-----|----------------------------------------------------------------------------------------------------------------------------------------------------------------------------------------------------------------------------------------------------------------------------------------------------------------------------------------------------------|---|

|    |                                  |     |                                                                                                                                                                                                           |   |
|----|----------------------------------|-----|-----------------------------------------------------------------------------------------------------------------------------------------------------------------------------------------------------------|---|
| 16 | Allocation concealment mechanism | 16b | Mechanism of implementing the allocation sequence (eg, central telephone; sequentially numbered, opaque, sealed envelopes), describing any steps to conceal the sequence until interventions are assigned | 6 |
|----|----------------------------------|-----|-----------------------------------------------------------------------------------------------------------------------------------------------------------------------------------------------------------|---|

|    |                |     |                                                                                                                           |   |
|----|----------------|-----|---------------------------------------------------------------------------------------------------------------------------|---|
| 20 | Implementation | 16c | Who will generate the allocation sequence, who will enrol participants, and who will assign participants to interventions | 6 |
|----|----------------|-----|---------------------------------------------------------------------------------------------------------------------------|---|

|    |                    |     |                                                                                                                                           |    |
|----|--------------------|-----|-------------------------------------------------------------------------------------------------------------------------------------------|----|
| 24 | Blinding (masking) | 17a | Who will be blinded after assignment to interventions (eg, trial participants, care providers, outcome assessors, data analysts), and how | 13 |
|----|--------------------|-----|-------------------------------------------------------------------------------------------------------------------------------------------|----|

|    |  |     |                                                                                                                                                      |     |
|----|--|-----|------------------------------------------------------------------------------------------------------------------------------------------------------|-----|
| 27 |  | 17b | If blinded, circumstances under which unblinding is permissible, and procedure for revealing a participant's allocated intervention during the trial | N/A |
|----|--|-----|------------------------------------------------------------------------------------------------------------------------------------------------------|-----|

31 **Methods: Data collection, management, and analysis**

|    |                         |     |                                                                                                                                                                                                                                                                                                                                                                                                              |       |
|----|-------------------------|-----|--------------------------------------------------------------------------------------------------------------------------------------------------------------------------------------------------------------------------------------------------------------------------------------------------------------------------------------------------------------------------------------------------------------|-------|
| 33 | Data collection methods | 18a | Plans for assessment and collection of outcome, baseline, and other trial data, including any related processes to promote data quality (eg, duplicate measurements, training of assessors) and a description of study instruments (eg, questionnaires, laboratory tests) along with their reliability and validity, if known. Reference to where data collection forms can be found, if not in the protocol | 13-16 |
|----|-------------------------|-----|--------------------------------------------------------------------------------------------------------------------------------------------------------------------------------------------------------------------------------------------------------------------------------------------------------------------------------------------------------------------------------------------------------------|-------|

|    |  |     |                                                                                                                                                                                           |       |
|----|--|-----|-------------------------------------------------------------------------------------------------------------------------------------------------------------------------------------------|-------|
| 39 |  | 18b | Plans to promote participant retention and complete follow-up, including list of any outcome data to be collected for participants who discontinue or deviate from intervention protocols | 13-16 |
|----|--|-----|-------------------------------------------------------------------------------------------------------------------------------------------------------------------------------------------|-------|

|    |                                 |     |                                                                                                                                                                                                                                                                                                                                       |                                             |
|----|---------------------------------|-----|---------------------------------------------------------------------------------------------------------------------------------------------------------------------------------------------------------------------------------------------------------------------------------------------------------------------------------------|---------------------------------------------|
| 1  | Data management                 | 19  | Plans for data entry, coding, security, and storage, including any related processes to promote data quality (eg, double data entry; range checks for data values). Reference to where details of data management procedures can be found, if not in the protocol                                                                     | 16-17                                       |
| 2  |                                 |     |                                                                                                                                                                                                                                                                                                                                       |                                             |
| 3  |                                 |     |                                                                                                                                                                                                                                                                                                                                       |                                             |
| 4  |                                 |     |                                                                                                                                                                                                                                                                                                                                       |                                             |
| 5  | Statistical methods             | 20a | Statistical methods for analysing primary and secondary outcomes. Reference to where other details of the statistical analysis plan can be found, if not in the protocol                                                                                                                                                              | 16-17                                       |
| 6  |                                 |     |                                                                                                                                                                                                                                                                                                                                       |                                             |
| 7  |                                 |     |                                                                                                                                                                                                                                                                                                                                       |                                             |
| 8  |                                 | 20b | Methods for any additional analyses (eg, subgroup and adjusted analyses)                                                                                                                                                                                                                                                              | 16-17                                       |
| 9  |                                 |     |                                                                                                                                                                                                                                                                                                                                       |                                             |
| 10 |                                 | 20c | Definition of analysis population relating to protocol non-adherence (eg, as randomised analysis), and any statistical methods to handle missing data (eg, multiple imputation)                                                                                                                                                       | 16-17                                       |
| 11 |                                 |     |                                                                                                                                                                                                                                                                                                                                       |                                             |
| 12 |                                 |     |                                                                                                                                                                                                                                                                                                                                       |                                             |
| 13 |                                 |     |                                                                                                                                                                                                                                                                                                                                       |                                             |
| 14 | <b>Methods: Monitoring</b>      |     |                                                                                                                                                                                                                                                                                                                                       |                                             |
| 15 |                                 |     |                                                                                                                                                                                                                                                                                                                                       |                                             |
| 16 | Data monitoring                 | 21a | Composition of data monitoring committee (DMC); summary of its role and reporting structure; statement of whether it is independent from the sponsor and competing interests; and reference to where further details about its charter can be found, if not in the protocol. Alternatively, an explanation of why a DMC is not needed | Low risk study, therefore DMC is not needed |
| 17 |                                 |     |                                                                                                                                                                                                                                                                                                                                       |                                             |
| 18 |                                 |     |                                                                                                                                                                                                                                                                                                                                       |                                             |
| 19 |                                 |     |                                                                                                                                                                                                                                                                                                                                       |                                             |
| 20 |                                 |     |                                                                                                                                                                                                                                                                                                                                       |                                             |
| 21 |                                 |     |                                                                                                                                                                                                                                                                                                                                       |                                             |
| 22 |                                 | 21b | Description of any interim analyses and stopping guidelines, including who will have access to these interim results and make the final decision to terminate the trial                                                                                                                                                               | N/A                                         |
| 23 |                                 |     |                                                                                                                                                                                                                                                                                                                                       |                                             |
| 24 |                                 |     |                                                                                                                                                                                                                                                                                                                                       |                                             |
| 25 | Harms                           | 22  | Plans for collecting, assessing, reporting, and managing solicited and spontaneously reported adverse events and other unintended effects of trial interventions or trial conduct                                                                                                                                                     | N/A                                         |
| 26 |                                 |     |                                                                                                                                                                                                                                                                                                                                       |                                             |
| 27 |                                 |     |                                                                                                                                                                                                                                                                                                                                       |                                             |
| 28 | Auditing                        | 23  | Frequency and procedures for auditing trial conduct, if any, and whether the process will be independent from investigators and the sponsor                                                                                                                                                                                           | N/A                                         |
| 29 |                                 |     |                                                                                                                                                                                                                                                                                                                                       |                                             |
| 30 |                                 |     |                                                                                                                                                                                                                                                                                                                                       |                                             |
| 31 |                                 |     |                                                                                                                                                                                                                                                                                                                                       |                                             |
| 32 | <b>Ethics and dissemination</b> |     |                                                                                                                                                                                                                                                                                                                                       |                                             |
| 33 |                                 |     |                                                                                                                                                                                                                                                                                                                                       |                                             |
| 34 | Research ethics approval        | 24  | Plans for seeking research ethics committee/institutional review board (REC/IRB) approval                                                                                                                                                                                                                                             | 5-6                                         |
| 35 |                                 |     |                                                                                                                                                                                                                                                                                                                                       |                                             |
| 36 |                                 |     |                                                                                                                                                                                                                                                                                                                                       |                                             |
| 37 | Protocol amendments             | 25  | Plans for communicating important protocol modifications (eg, changes to eligibility criteria, outcomes, analyses) to relevant parties (eg, investigators, REC/IRBs, trial participants, trial registries, journals, regulators)                                                                                                      | In MEC protocol                             |
| 38 |                                 |     |                                                                                                                                                                                                                                                                                                                                       |                                             |
| 39 |                                 |     |                                                                                                                                                                                                                                                                                                                                       |                                             |
| 40 |                                 |     |                                                                                                                                                                                                                                                                                                                                       |                                             |
| 41 |                                 |     |                                                                                                                                                                                                                                                                                                                                       |                                             |
| 42 |                                 |     |                                                                                                                                                                                                                                                                                                                                       |                                             |

|    |                               |     |                                                                                                                                                                                                                                                                                     |                 |
|----|-------------------------------|-----|-------------------------------------------------------------------------------------------------------------------------------------------------------------------------------------------------------------------------------------------------------------------------------------|-----------------|
| 1  | Consent or assent             | 26a | Who will obtain informed consent or assent from potential trial participants or authorised surrogates, and how (see Item 32)                                                                                                                                                        | In MEC protocol |
| 2  |                               |     |                                                                                                                                                                                                                                                                                     |                 |
| 3  |                               |     |                                                                                                                                                                                                                                                                                     |                 |
| 4  |                               | 26b | Additional consent provisions for collection and use of participant data and biological specimens in ancillary studies, if applicable                                                                                                                                               | N/A             |
| 5  |                               |     |                                                                                                                                                                                                                                                                                     |                 |
| 6  |                               |     |                                                                                                                                                                                                                                                                                     |                 |
| 7  | Confidentiality               | 27  | How personal information about potential and enrolled participants will be collected, shared, and maintained in order to protect confidentiality before, during, and after the trial                                                                                                | In MEC protocol |
| 8  |                               |     |                                                                                                                                                                                                                                                                                     |                 |
| 9  |                               |     |                                                                                                                                                                                                                                                                                     |                 |
| 10 | Declaration of interests      | 28  | Financial and other competing interests for principal investigators for the overall trial and each study site                                                                                                                                                                       | 18              |
| 11 |                               |     |                                                                                                                                                                                                                                                                                     |                 |
| 12 |                               |     |                                                                                                                                                                                                                                                                                     |                 |
| 13 | Access to data                | 29  | Statement of who will have access to the final trial dataset, and disclosure of contractual agreements that limit such access for investigators                                                                                                                                     | In MEC protocol |
| 14 |                               |     |                                                                                                                                                                                                                                                                                     |                 |
| 15 |                               |     |                                                                                                                                                                                                                                                                                     |                 |
| 16 | Ancillary and post-trial care | 30  | Provisions, if any, for ancillary and post-trial care, and for compensation to those who suffer harm from trial participation                                                                                                                                                       | In MEC protocol |
| 17 |                               |     |                                                                                                                                                                                                                                                                                     |                 |
| 18 |                               |     |                                                                                                                                                                                                                                                                                     |                 |
| 19 |                               |     |                                                                                                                                                                                                                                                                                     |                 |
| 20 | Dissemination policy          | 31a | Plans for investigators and sponsor to communicate trial results to participants, healthcare professionals, the public, and other relevant groups (eg, via publication, reporting in results databases, or other data sharing arrangements), including any publication restrictions | In MEC protocol |
| 21 |                               |     |                                                                                                                                                                                                                                                                                     |                 |
| 22 |                               |     |                                                                                                                                                                                                                                                                                     |                 |
| 23 |                               |     |                                                                                                                                                                                                                                                                                     |                 |
| 24 |                               | 31b | Authorship eligibility guidelines and any intended use of professional writers                                                                                                                                                                                                      | N/A             |
| 25 |                               |     |                                                                                                                                                                                                                                                                                     |                 |
| 26 |                               | 31c | Plans, if any, for granting public access to the full protocol, participant-level dataset, and statistical code                                                                                                                                                                     | N/A             |
| 27 |                               |     |                                                                                                                                                                                                                                                                                     |                 |
| 28 |                               |     |                                                                                                                                                                                                                                                                                     |                 |
| 29 | <b>Appendices</b>             |     |                                                                                                                                                                                                                                                                                     |                 |
| 30 |                               |     |                                                                                                                                                                                                                                                                                     |                 |
| 31 | Informed consent materials    | 32  | Model consent form and other related documentation given to participants and authorised surrogates                                                                                                                                                                                  | In IRB approval |
| 32 |                               |     |                                                                                                                                                                                                                                                                                     |                 |
| 33 |                               |     |                                                                                                                                                                                                                                                                                     |                 |
| 34 | Biological specimens          | 33  | Plans for collection, laboratory evaluation, and storage of biological specimens for genetic or molecular analysis in the current trial and for future use in ancillary studies, if applicable                                                                                      | N/A             |
| 35 |                               |     |                                                                                                                                                                                                                                                                                     |                 |
| 36 |                               |     |                                                                                                                                                                                                                                                                                     |                 |

37 \*It is strongly recommended that this checklist be read in conjunction with the SPIRIT 2013 Explanation & Elaboration for important clarification on the items.  
 38 Amendments to the protocol should be tracked and dated. The SPIRIT checklist is copyrighted by the SPIRIT Group under the Creative Commons  
 39 "[Attribution-NonCommercial-NoDerivs 3.0 Unported](https://creativecommons.org/licenses/by-nc-nd/3.0/)" license.  
 40

# BMJ Open

**Rationale and study protocol of the Physical Activity and Dietary intervention in women with OVarian cancer (PADOVA) study: A randomised controlled trial to evaluate effectiveness of a tailored exercise and dietary intervention on body composition, physical function and fatigue in women with ovarian cancer undergoing chemotherapy**

|                                 |                                                                                                                                                                                                                                                                                                                                                                                                                                                                                                                                                                                              |
|---------------------------------|----------------------------------------------------------------------------------------------------------------------------------------------------------------------------------------------------------------------------------------------------------------------------------------------------------------------------------------------------------------------------------------------------------------------------------------------------------------------------------------------------------------------------------------------------------------------------------------------|
| Journal:                        | <i>BMJ Open</i>                                                                                                                                                                                                                                                                                                                                                                                                                                                                                                                                                                              |
| Manuscript ID                   | bmjopen-2020-036854.R1                                                                                                                                                                                                                                                                                                                                                                                                                                                                                                                                                                       |
| Article Type:                   | Protocol                                                                                                                                                                                                                                                                                                                                                                                                                                                                                                                                                                                     |
| Date Submitted by the Author:   | 27-May-2020                                                                                                                                                                                                                                                                                                                                                                                                                                                                                                                                                                                  |
| Complete List of Authors:       | Stelten, Stephanie; Amsterdam UMC - Locatie VUMC, Epidemiology and Biostatistics<br>Hoedjes, Meeke ; Tilburg University, Medical and Clinical Psychology Kenter, Gemma; Amsterdam UMC - Locatie AMC, Obstetrics and Gynaecology; Amsterdam UMC - Locatie VUMC, Obstetrics and Gynaecology<br>Kampman, Ellen; Wageningen University and Research, Division of Human Nutrition and Health<br>Huijsmans, Rosalie; Amsterdam UMC - Locatie VUMC, Rehabilitation Medicine<br>van Lonkhuijzen, Luc; Amsterdam UMC - Locatie AMC, Obstetrics and Gynaecology<br>Buffart, LM; Radboudumc, Physiology |
| <b>Primary Subject Heading</b>: | Oncology                                                                                                                                                                                                                                                                                                                                                                                                                                                                                                                                                                                     |
| Secondary Subject Heading:      | Nutrition and metabolism, Sports and exercise medicine                                                                                                                                                                                                                                                                                                                                                                                                                                                                                                                                       |
| Keywords:                       | Nutritional support < ONCOLOGY, Gynaecological oncology < ONCOLOGY, NUTRITION & DIETETICS, SPORTS MEDICINE, REHABILITATION MEDICINE, Epidemiology < ONCOLOGY                                                                                                                                                                                                                                                                                                                                                                                                                                 |
|                                 |                                                                                                                                                                                                                                                                                                                                                                                                                                                                                                                                                                                              |

SCHOLARONE™  
Manuscripts





I, the Submitting Author has the right to grant and does grant on behalf of all authors of the Work (as defined in the below author licence), an exclusive licence and/or a non-exclusive licence for contributions from authors who are: i) UK Crown employees; ii) where BMJ has agreed a CC-BY licence shall apply, and/or iii) in accordance with the terms applicable for US Federal Government officers or employees acting as part of their official duties; on a worldwide, perpetual, irrevocable, royalty-free basis to BMJ Publishing Group Ltd ("BMJ") its licensees and where the relevant Journal is co-owned by BMJ to the co-owners of the Journal, to publish the Work in this journal and any other BMJ products and to exploit all rights, as set out in our [licence](#).

The Submitting Author accepts and understands that any supply made under these terms is made by BMJ to the Submitting Author unless you are acting as an employee on behalf of your employer or a postgraduate student of an affiliated institution which is paying any applicable article publishing charge ("APC") for Open Access articles. Where the Submitting Author wishes to make the Work available on an Open Access basis (and intends to pay the relevant APC), the terms of reuse of such Open Access shall be governed by a Creative Commons licence – details of these licences and which [Creative Commons](#) licence will apply to this Work are set out in our licence referred to above.

Other than as permitted in any relevant BMJ Author's Self Archiving Policies, I confirm this Work has not been accepted for publication elsewhere, is not being considered for publication elsewhere and does not duplicate material already published. I confirm all authors consent to publication of this Work and authorise the granting of this licence.

1  
2  
3 1 **Rationale and study protocol of the Physical Activity and Dietary intervention in women with**  
4  
5 2 **OVArrian cancer (PADOVA) study: A randomised controlled trial to evaluate effectiveness of a**  
6  
7 3 **tailored exercise and dietary intervention on body composition, physical function and fatigue in**  
8  
9 4 **women with ovarian cancer undergoing chemotherapy**

10  
11 5 S. Stelten<sup>1</sup>, M. Hoedjes<sup>2</sup>, G.G. Kenter<sup>3,4,5</sup>, E. Kampman<sup>6</sup>, R.J. Huijsmans<sup>7</sup>, L.R.C.W. van Lonkhuijzen<sup>4</sup>,  
12  
13 6 L.M. Buffart<sup>8</sup>

14  
15  
16 7 *Correspondence*

17  
18 8 Laurien M. Buffart

19  
20 9 Geert Grooteplein Zuid 10

21  
22 10 6500 HB Nijmegen, the Netherlands

23  
24 11 E-mail address: [laurien.buffart@radboudumc.nl](mailto:laurien.buffart@radboudumc.nl)

25  
26 12 Tel: +31 20 444 9931

27  
28 13

29  
30 14 *Authors affiliations*

31  
32 15 <sup>1</sup>Amsterdam UMC, Vrije Universiteit Amsterdam, Department of Epidemiology and Biostatistics,  
33  
34 16 Amsterdam Public Health research institute, Cancer Center Amsterdam, de Boelelaan 1089a, 1081 HV  
35  
36 17 Amsterdam, Netherlands

37  
38 18 <sup>2</sup>Tilburg University, Center of Research on Psychology in Somatic diseases, Department of Medical and  
39  
40 19 Clinical Psychology, Warandelaan 2, 5037 AB Tilburg, Netherlands

41  
42 20 <sup>3</sup>Amsterdam UMC, Vrije Universiteit Amsterdam, Department of Obstetrics and Gynaecology, Cancer  
43  
44 21 Center Amsterdam, Center for Gynaecologic Oncology Amsterdam (CGOA), de Boelelaan 1117, 1081  
45  
46 22 HV Amsterdam, Netherlands

47  
48 23 <sup>4</sup>Amsterdam UMC, Univ(ersity) of Amsterdam, Department of Obstetrics and Gynaecology, Center for  
49  
50 24 Gynaecologic Oncology Amsterdam (CGOA), Meibergdreef 9, 1105 AZ Amsterdam, Netherlands

51  
52 25 <sup>5</sup>The Netherlands Cancer Institute – Antoni van Leeuwenhoek Hospital, Department of Gynaecology,  
53  
54 26 Center for Gynaecologic Oncology Amsterdam (CGOA), Plesmanlaan 121, 1066 CX Amsterdam,  
55  
56 27 Netherlands

56  
57 28 <sup>6</sup>Wageningen University and Research, Division of Human Nutrition and Health, P.O. Box 17, 6700 AA  
58  
59 29 Wageningen, Netherlands

60  
30 27 <sup>7</sup>Amsterdam UMC, Vrije Universiteit van Amsterdam, Department of Rehabilitation Medicine, de

1  
2  
3  
4  
5  
6  
7  
8  
9  
10  
11  
12  
13  
14  
15  
16  
17  
18  
19  
20  
21  
22  
23  
24  
25  
26  
27  
28  
29  
30  
31  
32  
33  
34  
35  
36  
37  
38  
39  
40  
41  
42  
43  
44  
45  
46  
47  
48  
49  
50  
51  
52  
53  
54  
55  
56  
57  
58  
59  
60

31 Boelelaan 1117, 1081HV Amsterdam, Netherlands  
32 <sup>§</sup>Radboud University Medical Center, Department of Physiology, Radboud Institute of Health Sciences,  
33 P.O. Box 9101, 6500 HB Nijmegen, Netherlands  
34  
35 Word count: 3986 (excluding title page, abstract, references, figures and tables)

For peer review only

## 36 ABSTRACT

37  
38 **Introduction:** As a consequence of ovarian cancer and its treatment, many women with ovarian cancer  
39 have to deal with reduced physical function, fatigue and loss of weight and/or muscle mass,  
40 compromising quality of life. Exercise and dietary interventions can positively influence body  
41 composition, physical fitness and function and fatigue in patients with cancer. However, there is no data  
42 from randomised controlled trials on the effectiveness of exercise and dietary interventions in patients  
43 with ovarian cancer. Due to a complex disease trajectory, a relatively poor survival and distinct disease-  
44 and treatment-induced side effects, it is unclear whether exercise and dietary interventions that were  
45 shown feasible and effective in other types of cancer produce comparable results in patients with ovarian  
46 cancer. The aim of this paper is to present the design of the multicenter randomised controlled Physical  
47 Activity and Dietary intervention in OVArrian cancer (PADOVA) trial and to describe how the exercise  
48 and dietary intervention is tailored to specific comorbidities, and disease- and treatment induced adverse  
49 effects in patients with ovarian cancer.

50 **Methods and analysis:** Adult women with primary epithelial ovarian cancer who are scheduled to  
51 undergo first-line (neo)adjuvant chemotherapy (n=122) are randomly allocated to a combined exercise  
52 and dietary intervention or a usual care control group during chemotherapy. Primary outcomes are body  
53 composition, physical function and fatigue. Outcome measures will be assessed before the start of  
54 chemotherapy, three weeks after completion of chemotherapy and 12 weeks later. The exercise and  
55 dietary intervention was tailored to ovarian cancer specific comorbidities and adverse effects of ovarian  
56 cancer and its treatment following the I3-S strategy.

57 **Ethics and dissemination:** This study has been approved by the medical ethical committee of the  
58 Amsterdam UMC (reference: 018). Results of the study will be published in international peer-reviewed  
59 journals.

60 **Trial registration number:** Netherlands Trial register (NTR6300)

### 61 62 **Strengths and limitations of this study**

- 63 • This is a randomised controlled trial in women with ovarian cancer.
- 64 • Systematic development and tailoring of the exercise and dietary intervention will improve  
65 compliance to the intervention and prevent drop out.

- 66 • This study will significantly contribute to the scientific evidence on the benefits of exercise and  
67 dietary support during chemotherapy in an understudied group of patients.
- 68 • This study offers a combined exercise and dietary intervention and therefore the effects of an  
69 exercise or dietary intervention alone cannot be disentangled.

## 71 INTRODUCTION

72 Ovarian cancer is the seventh most common type of cancer worldwide, with 239.000 new cases  
73 annually.[1] Ovarian cancer is often diagnosed at an advanced International Federation of Gynaecology  
74 and Obstetrics (FIGO) stage resulting in a poor overall prognosis.[2] Overall 5-year survival rate for  
75 ovarian cancer is 30-40%, but ranges from 92% in patients with FIGO stage I at diagnosis to 29% in  
76 patients with FIGO stage IV.[2]

77 The majority (90%) of malignant ovarian tumors are of epithelial origin.[2] Standard care for epithelial  
78 ovarian cancer includes cytoreductive surgery and platinum- and taxane-based (neo)adjuvant  
79 chemotherapy.[3,4] As a consequence of ovarian cancer and its treatment, many women have physical  
80 and/or psychosocial problems such as reduced physical function and fatigue, compromising quality of  
81 life.[5-14] Additionally, previous studies reported that half of the patients suffer from sarcopenia (i.e. loss  
82 of skeletal muscle mass) or malnutrition at diagnosis and that the prevalence increased during  
83 neoadjuvant chemotherapy.[9,10,15,16] Independent from the presence of sarcopenia and malnutrition,  
84 studies reported that 24-57% of patients with ovarian cancer are overweight and 10-35% are  
85 obese.[9,10,17-21]

86 Observational studies in women with ovarian cancer found that sarcopenia, overweight and obesity at  
87 diagnosis, as well as loss of body weight and muscle mass during treatment, and underweight after  
88 treatment are associated with a lower survival rate.[9-11,17-22] Furthermore, observational studies  
89 among patients with cancer, not including ovarian cancer, have shown that higher levels of physical  
90 activity or physical fitness are associated with better survival.[23,24] Therefore, it may be important to  
91 prevent weight gain or involuntary weight loss, and maintain physical fitness and muscle mass during  
92 treatment.

93 Exercise and dietary interventions are both non-pharmacological interventions that can positively  
94 influence body composition, physical fitness and function and reduce fatigue in patients with cancer.[25-  
95 29] A meta-analysis of intervention studies among the general population[30] as well as the International

1  
2  
3 96 Society of Sports Nutrition[31] highlight that a combined exercise and dietary intervention is more  
4  
5 97 effective for changing body composition than an exercise or dietary intervention alone. Most previous  
6  
7 98 studies examining exercise or dietary interventions in patients with cancer were conducted in patients  
8  
9 99 with breast cancer. It is unclear whether the effects of exercise and dietary interventions found in patients  
10  
11 100 with breast cancer can be generalized to women with ovarian cancer. Compared with breast cancer,  
12  
13 101 ovarian cancer is often detected in a more advanced stage[32] and in older women. Ovarian cancer also  
14  
15 102 has a substantially different treatment trajectory, i.e. different type of chemotherapy and other adjuvant  
16  
17 103 therapy regimens. A few previous pilot studies have indicated that low-to-moderate intensity exercise  
18  
19 104 interventions[33,34] or a combined exercise and dietary intervention[35] during chemotherapy are  
20  
21 105 feasible in women with ovarian cancer. Adequately powered randomised controlled trials (RCT)  
22  
23 106 evaluating the effect of an exercise and dietary intervention during treatment in patients with ovarian  
24  
25 107 cancer are lacking. Therefore, the Physical Activity and Dietary intervention in OVARian cancer  
26  
27 108 (PADOVA) study was initiated. The PADOVA study aims to evaluate the effectiveness of a combined  
28  
29 109 exercise and dietary intervention during chemotherapy on body composition, physical function, and  
30  
31 110 fatigue as primary outcomes, compared to an usual care control group in women undergoing  
32  
33 111 chemotherapy for ovarian cancer. Secondary outcomes are physical activity and fitness, dietary intake,  
34  
35 112 Body Mass Index (BMI), patients reported outcomes and treatment toxicity and completion rates. The  
36  
37 113 secondary aim is to conduct an extensive process evaluation to examine how and why the intervention  
38  
39 114 is (in)effective.

40  
41 115 To optimize intervention feasibility and study retention rates, we aim to offer exercise and dietary  
42  
43 116 interventions that are specifically tailored to the comorbidities, disease- and treatment induced adverse  
44  
45 117 effects that individual patients with ovarian cancer may face. This paper presents the design of the  
46  
47 118 multicenter randomised controlled PADOVA trial, and describes how the combined exercise and dietary  
48  
49 119 intervention can be tailored specifically to patients with ovarian cancer.  
50

51

## 52 121 **METHODS AND ANALYSIS**

53 122 The PADOVA study is a multicenter, single blind, randomised controlled trial. This study is funded by  
54  
55 123 Dutch Cancer Society (VU 2015-7950), sponsored by Amsterdam UMC and approved by the medical  
56  
57 124 ethical committee of Amsterdam UMC. Patient inclusion and data collection has started in February  
58  
59 125 2018 and is currently ongoing.  
60

## 126 **Participants**

127 The study aims to include 122 adult (aged  $\geq 18$  years) women who are scheduled for (neo)adjuvant  
128 first-line chemotherapy treatment for primary epithelial ovarian cancer. Patients are excluded from this  
129 study when they have had a prior cancer diagnosis within 5 years, are not able to perform basic  
130 activities of daily living, have a contraindication for exercise (e.g. heart failure), have a cognitive  
131 disorder or severe emotional instability (e.g. schizophrenia, Alzheimer), are unable to read and/or write  
132 Dutch or have a life expectancy of less than 3 months.

133

## 134 **Recruitment and randomisation**

135 Patients are recruited from the Center of Gynaecologic Oncology Amsterdam (which is a collaboration  
136 of all gynaecological oncologists from Amsterdam UMC, Netherlands Cancer Institute – Antoni van  
137 Leeuwenhoek and affiliated peripheral hospitals) and Catharina hospital and its collaborating  
138 peripheral hospitals in the South of the Netherlands. After diagnosis and before the start of  
139 neoadjuvant chemotherapy ( $\pm 2$  weeks) or adjuvant chemotherapy ( $\pm 4$  weeks), the gynaecological  
140 oncologist informs patients about the PADOVA study during an out-patient clinic visit. Written informed  
141 consent is obtained from all patients prior to participation. After baseline measurement, participants  
142 are stratified by FIGO stage (low (I/II) versus high (III/IV stage) and chemotherapy regimen (primary  
143 surgery followed by chemotherapy versus neoadjuvant chemotherapy followed by interval debulking  
144 and adjuvant chemotherapy) and randomly allocated to either a combined exercise and dietary  
145 intervention or a usual care group. An independent researcher performs the randomisation by using a  
146 table of random numbers in blocks of four generated by an independent statistician. Allocation  
147 sequence is concealed from the research and clinical staff. After randomisation, patients in both the  
148 intervention and the control group receive a brochure with general information on physical activity, diet  
149 and body weight recommendations for cancer survivors.[36] These recommendations are not  
150 individualized, nor supervised. Patients who do not wish to participate in the study are invited to  
151 complete a single questionnaire examining relevant characteristics and reasons for declining  
152 participation to verify representativeness of the study population. See Figure 1 for an overview of the  
153 study design and procedures.

## 154 **Development and description of the combined exercise and dietary intervention**

155 The aims of the exercise and dietary intervention are to maintain physical fitness and function, to prevent

1  
2  
3 156 the loss of lean body mass and to maintain a healthy body weight during (neo)adjuvant chemotherapy.  
4  
5 157 The intervention starts at the first cycle of chemotherapy and continues until three weeks after the last  
6  
7 158 cycle. In general, patients receive six cycles of chemotherapy (duration of  $\pm 18$  weeks). In case of dose  
8  
9 159 delay or discontinuation of chemotherapy treatment, duration of the intervention and range of time  
10  
11 160 between study measurements might differ between patients. For optimal intervention feasibility and  
12  
13 161 study retention rates it is important to offer an exercise and dietary intervention in the PADOVA study  
14  
15 162 which is specifically tailored to patients with ovarian cancer. The exercise intervention was based on the  
16  
17 163 exercise intervention that has previously been shown to effectively maintain physical fitness, limit fatigue  
18  
19 164 and enhance quality of life during chemotherapy in patients with breast cancer.[28] The dietary  
20  
21 165 intervention was based on Dutch and international guidelines on general nutritional support for patients  
22  
23 166 with cancer and nutritional support for malnourished patients or patients with ovarian cancer.[37-41]  
24  
25 167 These interventions were tailored via the I3-s strategy to ovarian cancer specific comorbidities, adverse  
26  
27 168 effects of ovarian cancer (e.g. ascites) and its surgical and chemotherapy treatment. The I3-S strategy  
28  
29 169 was introduced in 2015 by Dekker et al.[42] to develop comorbidity-related adaptations to exercise  
30  
31 170 therapy, and has previously been used to tailor exercise interventions to potential comorbidities and  
32  
33 171 adverse effects of breast cancer treatment[43] and patients with knee osteoarthritis.[44]  
34  
35 172 The I3-S strategy consists of four steps, via which relevant information on the specific disease is  
36  
37 173 collected. In the first step, information on comorbidities that occur in patients with ovarian cancer was  
38  
39 174 gathered. All registered comorbidities of patients (n=109) who were treated for ovarian cancer in 2016  
40  
41 175 in the Amsterdam UMC were collected from patients records. Comorbidities were categorized according  
42  
43 176 to International Classification of Diseases, 10th revision[45] (see Table 1 for an overview of all  
44  
45 177 comorbidities).

46 178  
47  
48  
49  
50  
51  
52  
53  
54  
55  
56  
57  
58  
59  
60



179 *Table 1: Comorbidities in patients with ovarian cancer (N=109)*

| Comorbidity                                                                                                                                                         | %  |
|---------------------------------------------------------------------------------------------------------------------------------------------------------------------|----|
| Hypertensive diseases (i.e. hypertension)                                                                                                                           | 28 |
| Ischaemic heart diseases (i.e. angina pectoris, myocardial infarction (>6 months), percutaneous transluminal coronary angioplasty, coronary artery bypass grafting) | 6  |
| Other forms of heart disease (i.e. atrial fibrillation and flutter, other cardiac arrhythmias, heart failure, other forms of heart disease not specified)           | 9  |
| Cerebrovascular diseases (i.e. stroke, not specified as haemorrhage or infarction)                                                                                  | 4  |
| Diseases of arteries, arterioles and capillaries (i.e. aortic aneurysm, peripheral vascular diseases)                                                               | 3  |
| Diseases of veins, lymphatic vessels and lymph nodes, not elsewhere classified (i.e. phlebitis and thrombophlebitis)                                                | 1  |
| Chronic lower respiratory diseases (i.e. chronic obstructive pulmonary disease, asthma)                                                                             | 16 |
| Diabetes Mellitus (unspecified)                                                                                                                                     | 8  |
| Disorders of thyroid gland (i.e. hypothyroidism/hyperthyroidism)                                                                                                    | 6  |
| Disorders of other endocrine glands (i.e. hypoparathyroidism/hyperparathyroidism)                                                                                   | 1  |
| Episodic and paroxysmal disorders (i.e. transient ischaemic attack)                                                                                                 | 1  |
| Other disorders of the nervous system (unspecified) 1                                                                                                               | 1  |
| Dementia in other diseases classified elsewhere (i.e. dementia in Parkinson disease)                                                                                | 1  |
| Diseases of liver (unspecified)                                                                                                                                     | 1  |
| Disorders of gallbladder, biliary tract and pancreas (i.e. cholelithiasis)                                                                                          | 5  |
| Renal failure (unspecified)                                                                                                                                         | 1  |
| Soft tissue disorders (i.e. rheumatism, unspecified)                                                                                                                | 2  |
| Tuberculosis                                                                                                                                                        | 1  |
| Malignant neoplasms (excl. basal cell carcinoma)                                                                                                                    | 7  |

1  
2  
3 180 Comorbidities with a prevalence of  $\geq 5\%$  were included in steps 2-4 of the I3-S strategy. In addition to  
4  
5 181 comorbidities, the potential adverse effects of ovarian cancer and its treatment were added to the  
6  
7 182 inventory. These adverse effects were derived from the literature[46], guidelines[47,48] and expert  
8  
9 183 meetings with (gynaecologic) oncologists. We included the adverse effects (incidence  $\geq 1\%$ ) of  
10  
11 184 carboplatin and paclitaxel as these are currently standard chemotherapy treatments of ovarian  
12  
13 185 cancer.[4] In addition, we included all potential adverse effects of surgery and ovarian cancer itself. We  
14  
15 186 focused on potential adverse effects relevant for health-care providers delivering the exercise or dietary  
16  
17 187 interventions. As a consequence, we excluded descriptions of acute adverse effects of chemotherapy  
18  
19 188 monitored by treating physicians during admission to the hospital. Additionally, we checked overlap of  
20  
21 189 comorbidities and adverse effects of ovarian cancer and its treatment with previously published I3-S  
22  
23 190 papers for knee osteoarthritis[44] and breast cancer[43] or nutritional guidelines.[37-39,41] The following  
24  
25 191 comorbidities (i.e. hypertensive diseases, ischaemic heart diseases, other forms of heart disease,  
26  
27 192 chronic lower respiratory diseases, Diabetes Mellitus), and adverse effects (clinical parameters such as  
28  
29 193 leukopenia/neutropenia, trombopenia, anemia; and symptoms of dyspnea, nausea, vomiting or  
30  
31 194 diarrhea, skin and nail changes, fever, dizziness, decreased or increased heart rate, change in body  
32  
33 195 weight, depression, numbness/loss of sensation, hearing and/or visual impairments, fatigue, pain and  
34  
35 196 chest pain) were described in previous publications[43,44] or nutritional guidelines[37-39,41] and are  
36  
37 197 not presented in this paper.

38 198 In the second and third step, contraindications and restrictions on exercise training were gathered as  
39  
40 199 well as solutions for exercise training in ovarian cancer specific comorbidities, adverse effects of ovarian  
41  
42 200 cancer and its treatment. This was based on literature[42-44,49], guidelines[38] and/or expert opinions  
43  
44 201 of (gynaecologic) oncologists and physical therapists specialized in oncology.

45 202 In the final step, comorbidities, adverse effects of ovarian cancer and its treatment, but also exercise  
46  
47 203 contraindications and restrictions were translated to clinical parameters and symptoms that can be  
48  
49 204 monitored during the intervention of the PADOVA study. All information was synthesized in a framework  
50  
51 205 (Table 2).

52  
53  
54 206  
55  
56  
57  
58  
59  
60

208 Table 2: framework with alternations for the exercise and dietary intervention

| Comorbidities, adverse effects<br>ovarian cancer or treatment              | Considerations                                                                                                                                                                                                                                                                | Actions/strategy                                                                                                                                                                                                                                                                                                                                                                                                                                                          |
|----------------------------------------------------------------------------|-------------------------------------------------------------------------------------------------------------------------------------------------------------------------------------------------------------------------------------------------------------------------------|---------------------------------------------------------------------------------------------------------------------------------------------------------------------------------------------------------------------------------------------------------------------------------------------------------------------------------------------------------------------------------------------------------------------------------------------------------------------------|
| <i>Comorbidities</i>                                                       |                                                                                                                                                                                                                                                                               |                                                                                                                                                                                                                                                                                                                                                                                                                                                                           |
| Disorders of thyroid gland (i.e. hypothyroidism/hyperthyroidism)           | Consider the following complications of disorders of thyroid gland: <ul style="list-style-type: none"> <li>• Weight loss or weight gain</li> <li>• Bradycardia in hypothyroidism or tachycardia in hyperthyroidism</li> <li>• Low energy/fatigue in hypothyroidism</li> </ul> | <ul style="list-style-type: none"> <li>• Refer to dietitian when weight loss/-gain occurs</li> <li>• Explain to patient brady-/tachycardia due to hypo-/hyperthyroidism</li> <li>• Monitor symptoms: in case of persistent co-existing symptoms (dyspnea, anxiety, fatigue): terminate exercise and refer to physician</li> <li>• Explain to patient fatigue due to hypothyroidism</li> <li>• Refer to physician when fatigue does not reduce in a few weeks</li> </ul>   |
| Disorders of gallbladder, biliary tract and pancreas (i.e. cholelithiasis) |                                                                                                                                                                                                                                                                               | <ul style="list-style-type: none"> <li>• Monitor symptoms and in case of persistent pain: terminate exercise and refer to physician</li> </ul>                                                                                                                                                                                                                                                                                                                            |
| Malignant neoplasms (excl. basal cell carcinoma) <sup>1</sup>              | Consider comorbidities and adverse effects of the malignant neoplasm that might interfere with the intervention                                                                                                                                                               |                                                                                                                                                                                                                                                                                                                                                                                                                                                                           |
| <i>Adverse effects ovarian cancer</i>                                      |                                                                                                                                                                                                                                                                               |                                                                                                                                                                                                                                                                                                                                                                                                                                                                           |
| Ascites (60%)                                                              | Consider the following complications of ascites: <ul style="list-style-type: none"> <li>• Discomfort</li> <li>• Pleural effusion and/or shortness in breath</li> <li>• Diminished nutritional intake</li> </ul>                                                               | <ul style="list-style-type: none"> <li>• Adjust exercise to a comfortable intensity or posture</li> <li>• In case of disproportional dyspnea: terminate exercise session and refer to physician</li> <li>• Refer to dietitian</li> </ul>                                                                                                                                                                                                                                  |
| <i>Adverse effects of chemotherapy and surgery</i>                         |                                                                                                                                                                                                                                                                               |                                                                                                                                                                                                                                                                                                                                                                                                                                                                           |
| Abdominal wound                                                            | Consider the following complications of an abdominal wound:                                                                                                                                                                                                                   | <ul style="list-style-type: none"> <li>• In the post-operative period (4-6 weeks) exercise is allowed, but pressure on the abdomen should be avoided therefore the 'abdominal crunch' and 'pullover' could be replaced with a 'lateral raise' and 'leg extension'</li> <li>• After 4-6 weeks isometric exercises could be replaced by eccentric exercises</li> <li>• Monitor symptoms: in case of pain or discomfort decrease training intensity or resistance</li> </ul> |

|                                                                                                                          |                                                                                                                                                                                                |                                                                                                                                                                                                                                                                                                                                                                                                                                                                                     |
|--------------------------------------------------------------------------------------------------------------------------|------------------------------------------------------------------------------------------------------------------------------------------------------------------------------------------------|-------------------------------------------------------------------------------------------------------------------------------------------------------------------------------------------------------------------------------------------------------------------------------------------------------------------------------------------------------------------------------------------------------------------------------------------------------------------------------------|
|                                                                                                                          | <ul style="list-style-type: none"> <li>Fever &gt;38.5 degrees Celsius due to wound infection</li> </ul>                                                                                        | <ul style="list-style-type: none"> <li>Contra-indication for exercise, refer to physician</li> </ul>                                                                                                                                                                                                                                                                                                                                                                                |
| Intestinal stoma                                                                                                         | <p>Consider the following complications of an intestinal stoma</p> <ul style="list-style-type: none"> <li>High output stoma (production of &gt;1 liter per 24 hour during ≥ 3 days)</li> </ul> | <ul style="list-style-type: none"> <li>See recommendation under 'abdominal wound'</li> <li>Avoid contact sport (e.g. football or martial arts)</li> </ul>                                                                                                                                                                                                                                                                                                                           |
| (Risk of) lymphedema in legs                                                                                             | <p>Consider the following complications of lymphedema in legs:</p> <ul style="list-style-type: none"> <li>Numbness/loss of sensation</li> </ul>                                                | <ul style="list-style-type: none"> <li>Monitor leg volume during exercise program; ask for symptoms of lymphedema</li> <li>Refer to lymphedema specialist when lymphedema is present, or when leg volumes increases and symptoms arise (advice on how to progress with exercise)</li> <li>Be careful with exercises that include walking, running or balance to prevent falls</li> <li>Advise patient to wear good fitting, stable footwear with good grip under surface</li> </ul> |
| Deep vein thrombosis (in leg)                                                                                            |                                                                                                                                                                                                | <ul style="list-style-type: none"> <li>Contra-indication for exercise, refer to a physician when the following symptoms occur: pain in the leg, red or discolored skin, or a feeling of warmth</li> </ul>                                                                                                                                                                                                                                                                           |
| Thrombophlebitis                                                                                                         |                                                                                                                                                                                                | <ul style="list-style-type: none"> <li>Avoid pressure or impact on affected area</li> <li>Monitor symptoms and in case of pain or discomfort decrease training intensity or resistance</li> </ul>                                                                                                                                                                                                                                                                                   |
| Nervousness/confusion                                                                                                    | <p>Consider the following cause of nervousness/confusion</p> <ul style="list-style-type: none"> <li>Sever anxiety or a psychiatric disorder</li> </ul>                                         | <ul style="list-style-type: none"> <li>Give the patient time to discuss feelings or thoughts</li> <li>Contra-indication for exercise, refer to a physician when a serious psychiatric disorder might be present</li> </ul>                                                                                                                                                                                                                                                          |
| Gastro-intestinal symptoms (i.e. anorexia, dyspepsia, constipation, taste disorder, dry mouth, mouth ulcers, stomatitis) | <p>Consider the following complications of gastro-intestinal symptoms:</p> <ul style="list-style-type: none"> <li>Diminished nutritional intake</li> </ul>                                     | <ul style="list-style-type: none"> <li>Refer to dietitian and/or physician</li> </ul>                                                                                                                                                                                                                                                                                                                                                                                               |
| Melaena                                                                                                                  |                                                                                                                                                                                                | <ul style="list-style-type: none"> <li>Contra-indication for exercise, refer to a physician</li> </ul>                                                                                                                                                                                                                                                                                                                                                                              |

209 <sup>1</sup> Patients with a current other malignancy or prior diagnosis (within 5 years) of cancer were excluded from participation in the PADOVA study

## 210 **Exercise intervention**

211 The exercise intervention consists of two one-hour exercise sessions per week including moderate-to-  
212 high intensity resistance and aerobic exercises. The exercise sessions are supervised by a physical  
213 therapist specifically trained in treating oncology patients, to inform patients on and monitor appropriate  
214 and safe exercise strategies. These physical therapists are affiliated with a nation-wide network that  
215 includes >600 physical therapy practices. This enables to offer the intervention close to a patients' home.  
216 Depending on physical therapy practice, patients train in small groups with other (non-)PADOVA  
217 patients (with cancer).

218 The exercise intervention is based on the exercise training principles (i.e. specificity, progression,  
219 overload, initial values, reversibility and diminishing returns).[50] The sessions start with a warming up  
220 of 10 minutes. Resistance exercises targeting six large muscle groups are conducted for 20 minutes per  
221 session. Prescribed exercises include vertical row, leg press, bench press, pull over, abdominal crunch  
222 and lunge. Due to the abdominal wound in the post-operative period (4-6 weeks) eccentric exercises  
223 with the abdominal muscles and pressure on the abdomen are prevented by omitting heavy lifting and  
224 exercises such as abdominal crunch and pullover. Instead, exercises with an isometric use of the  
225 abdominal muscles such as lateral raise or leg extension, are performed. An overview of all adaptations  
226 for patients with ovarian cancer is shown in Table 2. One repetition maximum (1RM) testing is repeated  
227 every three weeks, in line with chemotherapy regimen, to ensure adequate training intensity over time.  
228 Load of each resistance exercise is 70-80% of the 1RM with a gradual increase per week in between  
229 1RM testing. Exercises are performed in 2 sets of 8-10 repetitions. When the participant is unable to  
230 perform 2 sets of 10 repetitions, or when the Borg Scale of perceived exertion exceeds 15, load will be  
231 decreased by one step. When the Borg Scale of perceived exertion decreases to <12, the load will be  
232 increased. Aerobic exercises are conducted for 30 minutes per session, with an intensity of 50-80%  
233 (gradually increasing) of the maximal work load as estimated by the steep ramp test[51]. This test is  
234 repeated every 6 weeks to ensure adequate work load over time. When the Borg Scale of perceived  
235 exertion decreases to a score of  $\leq 12$  or increases to  $\geq 16$  the work load is adjusted.[52] In addition to the  
236 supervised sessions, patients are encouraged to be physically active on at least three additional days a  
237 week for 30 minutes to meet the recommended physical activity levels.[40]

## 238 **Dietary intervention**

239 The dietary intervention is provided by oncology dietitians once every three weeks during face-to-face

1  
2  
3 240 sessions of 30-45 minutes each at the hospital or by telephone using motivational interviewing  
4  
5 241 techniques.[53] Motivational interviewing is an effective counselling method for achieving health  
6  
7 242 behaviour change using techniques as reflective listening and summarizing, focusing on what the patient  
8  
9 243 wants, thinks and feels.[54] The PADOVA dietary intervention is based on Bandura's Social Cognitive  
10  
11 244 theory (SCT).[55] Lifestyle interventions based on SCT have been shown to improve health behaviours  
12  
13 245 in patients during and after cancer treatment,[56] and generally focus on improving self-efficacy, dealing  
14  
15 246 with sociostructural factors (impediments/barriers and facilitators), managing outcome expectations, and  
16  
17 247 setting goals to improve health behaviours.[55] The Behavior Change Techniques (BCT's) used to  
18  
19 248 promote heal behaviour change are defined according to the BCT Taxonomy version v1 [57] and listed  
20  
21 249 in supplementary table A. Content of the dietary intervention is based on the dietary guideline set by the  
22  
23 250 World Cancer Research Fund (WCRF)/American Institute for Cancer Research (AICR)[40] and an  
24  
25 251 sufficient total protein intake of at least 1.2 grams of protein per kg body weight per day[41,58] and 25  
26  
27 252 grams of protein per meal, since such evenly distributed protein intake is expected to optimize muscle  
28  
29 253 protein synthesis.[59] Counselling is tailored to the nutritional needs of each individual patient according  
30  
31 254 to body composition, nutritional status and dietary intake during chemotherapy. Patients who are (at risk  
32  
33 255 of) malnutrition are primarily counselled for prevention of weight loss by maintaining sufficient caloric  
34  
35 256 intake, particularly protein intake. Patients who are not at risk of developing malnutrition are primarily  
36  
37 257 counselled to meet the dietary guidelines set by the WCRF/AICR. During each counselling session,  
38  
39 258 patients will receive feedback on their body weight, BMI, body composition assessed via bio-electric  
40  
41 259 impedance analysis (BIA), diet quality, and on the extent to which they meet the protein goals and  
42  
43 260 WCRF/AICR dietary recommendations. Extended information on the content per dietary counselling  
44  
45 261 session is provided in supplementary table B.

262

### 263 **Control group**

264 Women in the control group will receive usual care during chemotherapy, which includes referral to a  
265 dietitian when malnutrition is detected by the gynaecological oncologist. Usual care does not include  
266 structured exercise and/or dietary counselling. In order to prevent nonparticipation and drop-out,  
267 patients in the control group are offered a maximum of three exercise and three dietary counselling  
268 sessions in twelve weeks after completion of chemotherapy and the first follow up measurement.

269

1  
2  
3 **270 Outcome measurements**

4  
5 271 An investigator blinded from group allocation conducts measurements at three time points. Participants  
6  
7 272 are instructed not to reveal their group allocation. Baseline measurements are conducted before  
8  
9 273 randomisation and the start of chemotherapy (T0), the second measurement three weeks after  
10  
11 274 completion of chemotherapy (T1) and the last measurement (T2) twelve weeks after T1. An overview of  
12  
13 275 all outcome measurements is presented in Table 3.

14  
15 276 *Table 3: Summary of outcome measurements*

| Outcome                                                      | Instrument                                                                                                                                                              | T0 | T1 | T2 |
|--------------------------------------------------------------|-------------------------------------------------------------------------------------------------------------------------------------------------------------------------|----|----|----|
| <i>Primary outcomes</i>                                      |                                                                                                                                                                         |    |    |    |
| Body composition                                             | Computed tomography imaging for the assessment of skeletal muscle area                                                                                                  | X  | X  |    |
|                                                              | Bio-electric impedance analysis for the assessment of fat mass                                                                                                          | X  | X  | X  |
| Physical fatigue                                             | Multidimensional Fatigue Inventory[60]                                                                                                                                  | X  | X  | X  |
| Physical function                                            | European Organisation Research and Treatment of Cancer-Quality of life questionnaire-Core 30[61]                                                                        | X  | X  | X  |
| <i>Secondary outcomes</i>                                    |                                                                                                                                                                         |    |    |    |
| Physical activity                                            | Accelerometer (Actigraph) for objective measurement of physical activity in seven consecutive days during all waking hours                                              | X  | X  | X  |
|                                                              | Physical Activity Scale for the Elderly[62] for self-reported levels of physical activity                                                                               | X  | X  | X  |
| Physical fitness                                             | Maximum oxygen uptake (peak VO <sub>2</sub> ) during a maximum exercise test on a cycle ergometer using a ramp protocol for the assessment of cardiorespiratory fitness | X  | X  | X  |
|                                                              | Hand held dynamometer for the assessment of muscle strength                                                                                                             | X  | X  | X  |
| Body Mass Index                                              | Body height on a calibrated scale to the nearest 0.1 mm                                                                                                                 | X  | X  | X  |
|                                                              | Body weight on a calibrated scale to the nearest 0.1 kg                                                                                                                 | X  | X  | X  |
| Dietary intake; WCRF/AICR guidelines                         | Food frequency questionnaire (developed by Wageningen University)                                                                                                       | X  | X  | X  |
| Dietary intake; protein intake                               | Self-composed food frequency questionnaire                                                                                                                              | X  | X  | X  |
| Health-related quality of life and symptoms                  | European Organisation Research and Treatment of Cancer-Quality of life questionnaire – Ovarian cancer (OV28)[63]                                                        | X  | X  | X  |
|                                                              | European Organisation Research and Treatment of Cancer-Quality of life questionnaire - Chemotherapy-induced peripheral neuropathy (CIPN20)[64]                          | X  | X  | X  |
|                                                              | Hospital Anxiety and Depression Scale[65]                                                                                                                               | X  | X  | X  |
|                                                              | Pittsburgh Sleep Quality Index[66]                                                                                                                                      | X  | X  | X  |
| Chemotherapy therapy completion rates and treatment toxicity | Medical records of which chemotherapy completion rates will be assessed as the relative dose intensity, i.e., the amount of particular                                  |    | X  |    |

|                                             |                                                                             |   |   |  |
|---------------------------------------------|-----------------------------------------------------------------------------|---|---|--|
|                                             | chemotherapy given in relation to the originally planned chemotherapy dose. |   |   |  |
| <i>Other study parameters</i>               |                                                                             |   |   |  |
| Blood sampling                              | Venous blood sample (40 ml)                                                 | X | X |  |
| Smoking and sociodemographics               | Self-composed questionnaire                                                 | X |   |  |
| Contamination of control group <sup>1</sup> | Self-composed questionnaire                                                 |   | X |  |

<sup>1</sup> Parameter will only be assessed in the control group

277

278

### 279 Primary outcomes

280 Primary outcomes are body composition, physical function and fatigue. Body composition is assessed  
 281 via skeletal muscle area and fat mass. Skeletal muscle area is assessed at T0 and T1 using routine  
 282 computed tomography (CT) imaging (first image extending from the third lumbar vertebra to iliac crest)  
 283 conducted for diagnostic purposes. CT is considered the gold standard for assessment of muscle mass  
 284 in cancer patients.[67] Because the CT of the third lumbar vertebra is not yet validated for the  
 285 assessment of body fat mass,[68] fat mass is assessed with a non-invasive measurement BIA.[69]  
 286 Physical function is assessed using the physical function subscale of the validated European  
 287 Organisation Research and Treatment of Cancer-Quality of life questionnaire-Core 30.[61] Physical  
 288 fatigue is assessed with the physical fatigue subscale of the Multidimensional Fatigue Inventory.[60]

289

### 290 Secondary outcomes

291 Secondary outcomes are physical activity, physical fitness (i.e. cardiorespiratory fitness and muscle  
 292 strength), dietary intake, BMI, health-related quality of life and symptoms of neuropathy, anxiety and  
 293 depression, sleep disturbances, chemotherapy treatment toxicity and completion rates. The  
 294 measurement instruments for the assessment of the secondary outcomes are presented in Table 3.

### 295 Other study parameters

296 During the T0 and T1 visit, a venous blood sample is drawn and stored in the PADOVA biobank for  
 297 future biomarker studies (e.g. to assess immune system functioning). Because collection of blood  
 298 samples is an addition to participation in the PADOVA study, an additional informed consent is obtained.  
 299 Covariates such as clinical data (e.g. cancer subtype, FIGO stage) and sociodemographic  
 300 characteristics (e.g. age, ethnicity) are assessed at baseline. Contamination (i.e. received supervised  
 301 exercise and/or dietary counselling) of the control group is assessed by a questionnaire at T1.



302

303 **Process evaluation**

304 A process evaluation is conducted using a mixed-method approach (using both quantitative and  
 305 qualitative research methods). Quantitative data on behavioral counselling skills of dietitians is assessed  
 306 during counselling sessions with the Behavior Change Counselling Inventory (BECCI).[70] Patients in  
 307 the intervention group fill out the Health Care Climate Questionnaire (HCCQ) to assess the extent to  
 308 which they perceive an autonomy supportive environment during counseling.[71] Quantitative data on  
 309 behavioral determinants of physical activity and dietary behavior (i.e. outcome expectations, self-  
 310 efficacy for eating and exercise habits, sociostructural factors, stage of change, type of motivation and  
 311 knowledge) are assessed on T0, T1 and T2 by questionnaires in all patients. The following process  
 312 evaluation components are examined by physical therapists and dietitians and reported in a form: dose  
 313 delivered, dose received and fidelity. Acceptability of the intervention is assessed by a questionnaire  
 314 filled out by patients and semi-structured interviews among patients, physical therapists and dietitians  
 315 conducted by a researcher. Interviews will be transcribed verbatim, coded in several phases[72,73] and  
 316 analyzed with Atlas.ti. Analyses are partly performed concurrently with data collection because  
 317 interviews will be held until data saturation is reached. An overview of all measurement instruments for  
 318 the process evaluation is presented in Table 4.

319

320 *Table 4: Overview of all measurement instruments for the process evaluation*

| Outcome                       | Instrument                                                            | T0 | T1             | T2             |
|-------------------------------|-----------------------------------------------------------------------|----|----------------|----------------|
| <i>Process evaluation</i>     |                                                                       |    |                |                |
| Behavioral determinants       | Multidimensional Outcome Expectations for Exercise Scale[62]          | X  | X              | X              |
|                               | Self-efficacy for eating and exercise habits – self-composed items    | X  | X              | X              |
|                               | Sociostructural factors, self-composed items                          | X  | X              | X              |
|                               | Stage of change[74]                                                   | X  | X              | X              |
|                               | Type of motivation: Treatment Self-Regulation Questionnaire[75]       | X  | X              | X              |
|                               | Knowledge (on WCRF recommendations): Items used in previous study[76] | X  | X              | X              |
| Acceptability of intervention | Self-composed items <sup>1</sup>                                      |    | X              |                |
|                               | The Health Care Climate Questionnaire – short form (6 items)[71]      |    | X              |                |
| Acceptability of intervention | Semi-structured interviews in healthcare professionals <sup>2</sup>   |    | X <sup>1</sup> | X <sup>4</sup> |
|                               | Semi-structured interviews in participants                            |    | X <sup>1</sup> | X <sup>4</sup> |

|                                            |                                                                                                                                                                   |                            |
|--------------------------------------------|-------------------------------------------------------------------------------------------------------------------------------------------------------------------|----------------------------|
| Dose delivered                             | Checklist <sup>2</sup> – Amount of (components of) sessions provided by physical therapist/dietitian                                                              | Daily, during intervention |
| Dose received                              | Checklist <sup>2</sup> – Amount of (components of) sessions participants actively engaged in                                                                      | Daily, during intervention |
| Fidelity                                   | Checklist <sup>2</sup> – Extend to which the intervention was executed as prescribed in the protocol (e.g. reasons for and amount of adaptations to the protocol) | Daily, during intervention |
| Behavioral counselling skills <sup>3</sup> | Behavior Change Counselling Inventory[70]                                                                                                                         | During intervention        |

321 <sup>1</sup> Parameters will only be assessed in intervention group

322 <sup>2</sup> Parameter will be examined in physical therapists and dietitians

323 <sup>3</sup> Parameter will be examined in dietitians

324 <sup>4</sup> Parameter will only be assessed in the control group

325

326 **Sample size calculation**

327 Sample size calculation is based on the results of a previous RCT among patients with breast cancer  
 328 that evaluated the effects of a combined aerobic and resistance exercise intervention (similar to the  
 329 PADOVA study),[28] a pilot study among patients with ovarian cancer that evaluated the feasibility of  
 330 an exercise intervention[34] and on clinically relevant differences in body composition and peak oxygen  
 331 uptake.[34,77-82] With 53 patients per study-arm, we are able to detect a clinically relevant between  
 332 group difference in effects directly post-intervention on physical function (10 points), physical fatigue  
 333 (2.7 points), body composition (3% in percentage body fat and muscle mass), and 10-15% difference in  
 334 peak oxygen uptake (alpha=0.05; power= 0.80). Taking into account a dropout of 15%, we aim to include  
 335 61 patients per group. Dropout rates are based on the 10-15% dropout rates from previously conducted  
 336 Dutch exercise trials in patients with cancer. [27,28,83]

337

338 **Statistical analysis**

339 The primary analysis focuses on the effects of the intervention directly after completion of chemotherapy  
 340 (T1), since both the intervention and control group have received counselling from a physical therapist  
 341 and/or dietitian at follow-up (T2). Data will be analysed according to the intention-to-treat principle.  
 342 Intervention effects (at T1) will be assessed using linear regression analysis for continuous outcomes,  
 343 by regressing the intervention on post-test value (T1) of the outcome, adjusting for baseline values (T0).  
 344 To examine whether intervention effects on body composition, physical function or fatigue are mediated  
 345 by changes in physical activity and fitness, and/or diet, a series of regression analysis according to the

1  
2  
3 346 product-of-coefficients test will be conducted.[84] Potential effect modification by relevant demographic  
4  
5 347 (e.g. age) and clinical (e.g. cancer stage, treatment regimen) variables will be explored by adding the  
6  
7 348 variable and its interaction term with the intervention into the regression model.  
8  
9 349

## 10 350 **DISCUSSION**

11  
12 351 This paper presents the rationale and design of the PADOVA study and the procedure of tailoring an  
13  
14 352 exercise and dietary intervention to patients with ovarian cancer. The PADOVA study aims to examine  
15  
16 353 the effectiveness of a combined exercise and dietary intervention on body composition, physical function  
17  
18 354 and fatigue in patients with ovarian cancer during chemotherapy. Additionally, an process evaluation is  
19  
20 355 conducted to examine the effective and ineffective components of the PADOVA intervention.

21  
22 356 A strength of this study is its randomized controlled design in women with ovarian cancer and systematic  
23  
24 357 development of the exercise and dietary intervention by the I3-S strategy to ensure adequate tailoring  
25  
26 358 of the intervention to this patient specific group. Because the intervention is adjusted to comorbidities,  
27  
28 359 disease- and treatment induced effects, we expect compliance to the intervention to be high and drop  
29  
30 360 out to be low. Another strength is the process evaluation because it retrieves information on how and  
31  
32 361 why the intervention is (un)successful.[85] With this information the exercise and dietary intervention will  
33  
34 362 be improved before the combined intervention is implemented in clinical practice.

35  
36 363 Aiming to maximize benefits on body composition, we combined an exercise and dietary intervention.  
37  
38 364 Consequently, we are unable to disentangle the effects of the exercise and dietary intervention.  
39  
40 365 However, we plan to perform a mediation analysis to explore whether the intervention effects on body  
41  
42 366 composition can be explained by changes in exercise or dietary components. Another limitation of this  
43  
44 367 study is its inability to study long-term effects of the intervention compared to the control group. In the  
45  
46 368 PADOVA study, exercise and dietary counselling will be offered to the control group after the first follow  
47  
48 369 up measurement in order to prevent nonparticipation and dropout and to limit contamination (exercise  
49  
50 370 and dietary intervention) in the control group during chemotherapy.

51  
52 371 Close collaboration with physical therapists specifically educated to supervise patients with cancer,  
53  
54 372 affiliated with a network throughout the Netherlands has the advantage that the exercise intervention  
55  
56 373 can be offered close to a patients' home. This increases the reach and scalability of the intervention.  
57  
58 374 Consequentially, this might also lead to small variations in the implementation of the intervention  
59  
60 375 protocol by each individual physical therapist.

1  
2  
3 376 This study will contribute to the evidence on the potential benefits of an exercise and dietary intervention  
4  
5 377 in patients with ovarian cancer during chemotherapy treatment who often face a complex and  
6  
7 378 unfavorable disease trajectory. If proven effective, a combined exercise and dietary intervention for  
8  
9 379 patients with ovarian cancer can be implemented in clinical practice.

10 380

### 11 381 **Patient and public involvement**

12  
13  
14 382 Patients were involved in the development of study specific patient information and they were asked to  
15  
16 383 assess the burden of time required to participate in this study. The opinion of patients has been  
17  
18 384 considered to improve the readability of the patient information sheets on the study. During the study  
19  
20 385 patients will be interviewed (e.g. on acceptability of the intervention) as part of the process evaluation.  
21  
22 386 This information could be important for implementation of the intervention in clinical practice. Study  
23  
24 387 results will be presented to patients in collaboration with the patient community.

25 388

### 26 389 **Ethics and dissemination**

27  
28  
29  
30 390 This study has been approved by the medical ethical committee of the Amsterdam UMC (reference:  
31  
32 391 018). Additional approval was obtained for the participating hospitals. The trial is registered in the  
33  
34 392 Netherlands Trial Register. Signed informed consent is required of all included participants. Results of  
35  
36 393 the study will be published in international peer-reviewed journals.

37 394

### 38 395 **Acknowledgements**

39 396 Not applicable.

40 397

### 41 398 **Contributors**

42  
43  
44  
45 399 EK, GGK, LMB and MH conceived the study. GGK, LMB, LRCWL, MH and SS designed the study.  
46  
47 400 LMB, MH, RJH and SS designed the intervention. LMB, MH and SS wrote the manuscript. All authors  
48  
49 401 read and approved the final manuscript.

50 402

### 51 403 **Funding**

52  
53  
54  
55 404 The PADOVA study is funded by the Dutch Cancer Society, grant number VU 2015-7950. The Dutch  
56  
57 405 Cancer Society was not involved in the design of the study, the collection, analysis and interpretation of

58  
59  
60

1  
2  
3 406 data, nor in writing the manuscript.  
4  
5 407

6  
7 408 **Competing interests**

8  
9 409 The authors declare that they have no competing interests.  
10  
11 410

12  
13 411 **Patient consent for publication**

14 412 Not required.  
15  
16 413

17  
18 414 **Provenance and peer review**

19 415 Not commissioned; externally peer reviewed.  
20  
21 416

22  
23  
24 417 *Figure 1: Overview of the PADOVA study design and procedures*  
25  
26 418

27  
28 419 **REFERENCES**

- 29  
30  
31 420 1. Ferlay J, Soerjomataram I, Dikshit R, et al. Cancer incidence and mortality worldwide: sources,  
32 421 methods and major patterns in GLOBOCAN 2012. *Int J Cancer* 2015;136(5):E359-86. doi:  
33 422 10.1002/ijc.29210 [published Online First: 2014/09/16]  
34 423 2. Reid BM, Permuth JB, Sellers TA. Epidemiology of ovarian cancer: a review. *Cancer Biol Med*  
35 424 2017;14(1):9-32.  
36 425 3. Netherlands CCCT. Epithelial Ovarian Carcinoma; National guidelines 2.0. 2012  
37 426 4. Group obotEGW, Raja FA, Ledermann JA, et al. Newly diagnosed and relapsed epithelial ovarian  
38 427 carcinoma: ESMO Clinical Practice Guidelines for diagnosis, treatment and follow-up†. *Annals of*  
39 428 *Oncology* 2013;24(suppl\_6):vi24-vi32. doi: 10.1093/annonc/mdt333  
40 429 5. Holzner B, Kemmler G, Meraner V, et al. Fatigue in ovarian carcinoma patients: a neglected issue?  
41 430 *Cancer* 2003;97(6):1564-72. doi: 10.1002/cncr.11253 [published Online First: 2003/03/11]  
42 431 6. Meraner V, Gamper EM, Grahmann A, et al. Monitoring physical and psychosocial symptom  
43 432 trajectories in ovarian cancer patients receiving chemotherapy. *BMC Cancer* 2012;12:77. doi:  
44 433 10.1186/1471-2407-12-77 [published Online First: 2012/03/01]  
45 434 7. von Gruenigen VE, Huang HQ, Gil KM, et al. Assessment of factors that contribute to decreased  
46 435 quality of life in Gynecologic Oncology Group ovarian cancer trials. *Cancer* 2009;115(20):4857-64.  
47 436 doi: 10.1002/cncr.24520 [published Online First: 2009/08/20]  
48 437 8. Kayl AE, Meyers CA. Side-effects of chemotherapy and quality of life in ovarian and breast cancer  
49 438 patients. *Curr Opin Obstet Gynecol* 2006;18(1):24-8. doi: 10.1097/01.gco.0000192996.20040.24  
50 439 [published Online First: 2006/02/24]  
51 440 9. Rutten IJ, van Dijk DP, Kruitwagen RF, et al. Loss of skeletal muscle during neoadjuvant  
52 441 chemotherapy is related to decreased survival in ovarian cancer patients. *J Cachexia Sarcopenia*  
53 442 *Muscle* 2016;7(4):458-66. doi: 10.1002/jcsm.12107 [published Online First: 2016/04/01]  
54 443 10. Kumar A, Moynagh MR, Multinu F, et al. Muscle composition measured by CT scan is a measurable  
55 444 predictor of overall survival in advanced ovarian cancer. *Gynecol Oncol* 2016;142(2):311-6. doi:  
56 445 10.1016/j.ygyno.2016.05.027  
57 446 11. Mardas M, Stelmach-Mardas M, Madry R. Body weight changes in patients undergoing  
58 447 chemotherapy for ovarian cancer influence progression-free and overall survival. *Support Care*  
59 448 *Cancer* 2017;25(3):795-800. doi: 10.1007/s00520-016-3462-1  
60 449 12. von Gruenigen VE, Frasure HE, Jenison EL, et al. Longitudinal assessment of quality of life and  
450 451 lifestyle in newly diagnosed ovarian cancer patients: the roles of surgery and chemotherapy. *Gynecol*  
*Oncol* 2006;103(1):120-6. doi: 10.1016/j.ygyno.2006.01.059 [published Online First: 2006/03/25]

- 1  
2  
3 452 13. Gil KM, Gibbons HE, Jenison EL, et al. Baseline characteristics influencing quality of life in women  
4 453 undergoing gynecologic oncology surgery. *Health Qual Life Outcomes* 2007;5:25. doi:  
5 454 10.1186/1477-7525-5-25 [published Online First: 2007/05/19]
- 6 455 14. Wenzel L, Huang HQ, Monk BJ, et al. Quality-of-life comparisons in a randomized trial of interval  
7 456 secondary cytoreduction in advanced ovarian carcinoma: a Gynecologic Oncology Group study. *J*  
8 457 *Clin Oncol* 2005;23(24):5605-12. doi: 10.1200/jco.2005.08.147 [published Online First: 2005/08/20]
- 9 458 15. Mardas M, Jamka M, Madry R, et al. Dietary habits changes and quality of life in patients undergoing  
10 459 chemotherapy for epithelial ovarian cancer. *Support Care Cancer* 2015;23(4):1015-23. doi:  
11 460 10.1007/s00520-014-2462-2 [published Online First: 2014/10/02]
- 12 461 16. Laky B, Janda M, Bauer J, et al. Malnutrition among gynaecological cancer patients. *Eur J Clin Nutr*  
13 462 2007;61(5):642-6. doi: 10.1038/sj.ejcn.1602540
- 14 463 17. Kumar A, Bakkum-Gamez JN, Weaver AL, et al. Impact of obesity on surgical and oncologic  
15 464 outcomes in ovarian cancer. *Gynecol Oncol* 2014;135(1):19-24. doi: 10.1016/j.ygyno.2014.07.103  
16 465 [published Online First: 2014/08/12]
- 17 466 18. Pavelka JC, Brown RS, Karlan BY, et al. Effect of obesity on survival in epithelial ovarian cancer.  
18 467 *Cancer* 2006;107(7):1520-4. doi: 10.1002/cncr.22194 [published Online First: 2006/08/31]
- 19 468 19. Aust S, Knogler T, Pils D, et al. Skeletal Muscle Depletion and Markers for Cancer Cachexia Are  
20 469 Strong Prognostic Factors in Epithelial Ovarian Cancer. *PLoS One* 2015;10(10):e0140403. doi:  
21 470 10.1371/journal.pone.0140403
- 22 471 20. Bandera EV, Lee VS, Rodriguez-Rodriguez L, et al. Impact of Chemotherapy Dosing on Ovarian  
23 472 Cancer Survival According to Body Mass Index. *JAMA Oncol* 2015;1(6):737-45. doi:  
24 473 10.1001/jamaoncol.2015.1796 [published Online First: 2015/07/17]
- 25 474 21. Kim SI, Kim HS, Kim TH, et al. Impact of underweight after treatment on prognosis of advanced-  
26 475 stage ovarian cancer. *J Immunol Res* 2014;2014:349546.
- 27 476 22. Hess LM, Barakat R, Tian C, et al. Weight change during chemotherapy as a potential prognostic  
28 477 factor for stage III epithelial ovarian carcinoma: a Gynecologic Oncology Group study. *Gynecol Oncol*  
29 478 2007;107(2):260-5. doi: 10.1016/j.ygyno.2007.06.010 [published Online First: 2007/08/07]
- 30 479 23. Schmid D, Leitzmann MF. Cardiorespiratory fitness as predictor of cancer mortality: a systematic  
31 480 review and meta-analysis. *Annals of oncology : official journal of the European Society for Medical*  
32 481 *Oncology* 2015;26(2):272-8. doi: 10.1093/annonc/mdu250 [published Online First: 2014/07/11]
- 33 482 24. McTiernan A, Friedenreich CM, Katzmarzyk PT, et al. Physical Activity in Cancer Prevention and  
34 483 Survival: A Systematic Review. *Med Sci Sports Exerc* 2019;51(6):1252-61. doi:  
35 484 10.1249/mss.0000000000001937 [published Online First: 2019/05/17]
- 36 485 25. Padilha CS, Marinello PC, Galvao DA, et al. Evaluation of resistance training to improve muscular  
37 486 strength and body composition in cancer patients undergoing neoadjuvant and adjuvant therapy: a  
38 487 meta-analysis. *J Cancer Surviv* 2017;11(3):339-49. doi: 10.1007/s11764-016-0592-x [published  
39 488 Online First: 2017/01/06]
- 40 489 26. Cohen CW, Fontaine KR, Arend RC, et al. A Ketogenic Diet Reduces Central Obesity and Serum  
41 490 Insulin in Women with Ovarian or Endometrial Cancer. *J Nutr* 2018;148(8):1253-60. doi:  
42 491 10.1093/jn/nxy119 [published Online First: 2018/08/24]
- 43 492 27. Kampshoff CS, Chinapaw MJ, Brug J, et al. Randomized controlled trial of the effects of high intensity  
44 493 and low-to-moderate intensity exercise on physical fitness and fatigue in cancer survivors: results of  
45 494 the Resistance and Endurance exercise After ChemoTherapy (REACT) study. *BMC Med*  
46 495 2015;13:275. doi: 10.1186/s12916-015-0513-2 [published Online First: 2015/10/31]
- 47 496 28. van Waart H, Stuiver MM, van Harten WH, et al. Effect of Low-Intensity Physical Activity and  
48 497 Moderate- to High-Intensity Physical Exercise During Adjuvant Chemotherapy on Physical Fitness,  
49 498 Fatigue, and Chemotherapy Completion Rates: Results of the PACES Randomized Clinical Trial. *J*  
50 499 *Clin Oncol* 2015;33(17):1918-27. doi: 10.1200/jco.2014.59.1081 [published Online First: 2015/04/29]
- 51 500 29. Demark-Wahnefried W, Morey MC, Sloane R, et al. Reach out to enhance wellness home-based  
52 501 diet-exercise intervention promotes reproducible and sustainable long-term improvements in health  
53 502 behaviors, body weight, and physical functioning in older, overweight/obese cancer survivors. *J Clin*  
54 503 *Oncol* 2012;30(19):2354-61. doi: 10.1200/jco.2011.40.0895 [published Online First: 2012/05/23]
- 55 504 30. Johns DJ, Hartmann-Boyce J, Jebb SA, et al. Diet or exercise interventions vs combined behavioral  
56 505 weight management programs: a systematic review and meta-analysis of direct comparisons. *J Acad*  
57 506 *Nutr Diet* 2014;114(10):1557-68. doi: 10.1016/j.jand.2014.07.005 [published Online First:  
58 507 2014/09/27]
- 59 508 31. Jager R, Kerksick CM, Campbell BI, et al. International Society of Sports Nutrition Position Stand:  
60 509 protein and exercise. *J Int Soc Sports Nutr* 2017;14:20.

1  
2  
3  
4  
5  
6  
7  
8  
9  
10  
11  
12  
13  
14  
15  
16  
17  
18  
19  
20  
21  
22  
23  
24  
25  
26  
27  
28  
29  
30  
31  
32  
33  
34  
35  
36  
37  
38  
39  
40  
41  
42  
43  
44  
45  
46  
47  
48  
49  
50  
51  
52  
53  
54  
55  
56  
57  
58  
59  
60

32. Gil KM, von Gruenigen VE. Physical activity and gynecologic cancer survivorship. *Recent Results Cancer Res* 2011;186:305-15. doi: 10.1007/978-3-642-04231-7\_13 [published Online First: 2010/11/30]
33. Newton MJ, Hayes SC, Janda M, et al. Safety, feasibility and effects of an individualised walking intervention for women undergoing chemotherapy for ovarian cancer: a pilot study. *BMC Cancer* 2011;11:389. doi: 10.1186/1471-2407-11-389 [published Online First: 2011/09/09]
34. Mizrahi D, Broderick C, Friedlander M, et al. An Exercise Intervention During Chemotherapy for Women With Recurrent Ovarian Cancer: A Feasibility Study. *Int J Gynecol Cancer* 2015;25(6):985-92. doi: 10.1097/igc.0000000000000460 [published Online First: 2015/04/29]
35. von Gruenigen VE, Frasura HE, Kavanagh MB, et al. Feasibility of a lifestyle intervention for ovarian cancer patients receiving adjuvant chemotherapy. *Gynecol Oncol* 2011;122(2):328-33. doi: 10.1016/j.ygyno.2011.04.043 [published Online First: 2011/05/24]
36. Gezond leven na kanker. In: Fonds SWKO, ed.: Wereld Kanker Onderzoeks Fonds, 2017.
37. Oncoline. Algemene voedings- en dieetbehandeling 2017 [updated 01-03-2017. Available from: <https://www.oncoline.nl/voedings-en-dieetbehandeling> accessed 20-08-2018 2018.
38. Oncoline. Eierstokkanker 2017 [updated 01-03-2017. Available from: <https://www.oncoline.nl/voeding-eierstokkanker>.
39. Oncoline. Ondervoeding bij patienten met kanker 2012 [updated 15-01-2012. Available from: <https://www.oncoline.nl/ondervoeding-bij-patienten-met-kanker>.
40. World Cancer Research Fund / American Institute for Cancer Research. Diet, Nutrition, Physical Activity and Cancer: a Global Perspective. Continuous Update Project Expert report, 2018.
41. Arends J, Bachmann P, Baracos V, et al. ESPEN guidelines on nutrition in cancer patients. *Clin Nutr* 2016 doi: 10.1016/j.clnu.2016.07.015 [published Online First: 2016/09/18]
42. Dekker J, de Rooij M, van der Leeden M. Exercise and comorbidity: the i3-S strategy for developing comorbidity-related adaptations to exercise therapy. *Disabil Rehabil* 2016;38(9):905-9. doi: 10.3109/09638288.2015.1066451
43. van der Leeden M, Huijsmans RJ, Geleijn E, et al. Tailoring exercise interventions to comorbidities and treatment-induced adverse effects in patients with early stage breast cancer undergoing chemotherapy: a framework to support clinical decisions. *Disabil Rehabil* 2017:1-11. doi: 10.1080/09638288.2016.1260647
44. de Rooij M, van der Leeden M, Avezaat E, et al. Development of comorbidity-adapted exercise protocols for patients with knee osteoarthritis. *Clin Interv Aging* 2014;9:829-42.
45. Organization WH. International statistical classification of diseases and related health problems (10th revision) [updated 2016. 5:[Available from: <https://icd.who.int/browse10/2016/en2019>.
46. Farmacotherapeutisch Kompas: Zorginstituut Nederland; [Available from: <https://farmacotherapeutischkompas.nl> accessed 20-09-2017.
47. Oncoline. Epitheliaal ovariumcarcinoom 2.1: Integraal Kankercentrum Nederland; 2018 [updated 2018-01-15.
48. Oncoline. Ascites, versie 2.0: Integraal Kankercentrum Nederland; 2010 [updated 19-01-2010.
49. Klein I, Danzi S. Thyroid Disease and the Heart. *Circulation* 2007;116(15):1725-35. doi: doi:10.1161/CIRCULATIONAHA.106.678326
50. Campbell KL, Neil SE, Winters-Stone KM. Review of exercise studies in breast cancer survivors: attention to principles of exercise training. *British journal of sports medicine* 2012;46(13):909-16. doi: 10.1136/bjsports-2010-082719 [published Online First: 2012/09/26]
51. De Backer IC, Schep G, Hoogeveen A, et al. Exercise testing and training in a cancer rehabilitation program: the advantage of the steep ramp test. *Arch Phys Med Rehabil* 2007;88(5):610-6. doi: 10.1016/j.apmr.2007.02.013 [published Online First: 2007/05/01]
52. Borg G. Borg's perceived exertion and pain scales. Champaign, IL, US: Human Kinetics 1998.
53. Miller WR, Rollnick S. Ten things that motivational interviewing is not. *Behav Cogn Psychother* 2009;37(2):129-40. doi: 10.1017/s1352465809005128 [published Online First: 2009/04/15]
54. Miller WR. Motivational interviewing: research, practice, and puzzles. *Addict Behav* 1996;21(6):835-42. doi: 10.1016/0306-4603(96)00044-5 [published Online First: 1996/11/01]
55. A. B. Social foundations of thought and action: a social cognitive theory. NJ: Englewood Cliffs ed1986.
56. Stacey FG, James EL, Chapman K, et al. A systematic review and meta-analysis of social cognitive theory-based physical activity and/or nutrition behavior change interventions for cancer survivors. *J Cancer Surviv* 2015;9(2):305-38. doi: 10.1007/s11764-014-0413-z [published Online First: 2014/11/30]
57. Michie S, Richardson M, Johnston M, et al. The behavior change technique taxonomy (v1) of 93 hierarchically clustered techniques: building an international consensus for the reporting of behavior

- 1  
2  
3 570 change interventions. *Ann Behav Med* 2013;46(1):81-95. doi: 10.1007/s12160-013-9486-6  
4 571 [published Online First: 2013/03/21]
- 5 572 58. Nitenberg G, Raynard B. Nutritional support of the cancer patient: issues and dilemmas. *Crit Rev*  
6 573 *Oncol Hematol* 2000;34(3):137-68. [published Online First: 2000/06/06]
- 7 574 59. Paddon-Jones D, Rasmussen BB. Dietary protein recommendations and the prevention of  
8 575 sarcopenia. *Curr Opin Clin Nutr Metab Care* 2009;12(1):86-90. doi:  
9 576 10.1097/MCO.0b013e32831cef8b [published Online First: 2008/12/06]
- 10 577 60. Smets EM, Garssen B, Bonke B, et al. The Multidimensional Fatigue Inventory (MFI) psychometric  
11 578 qualities of an instrument to assess fatigue. *J Psychosom Res* 1995;39(3):315-25. [published Online  
12 579 First: 1995/04/01]
- 13 580 61. Aaronson NK, Ahmedzai S, Bergman B, et al. The European Organization for Research and  
14 581 Treatment of Cancer QLQ-C30: a quality-of-life instrument for use in international clinical trials in  
15 582 oncology. *J Natl Cancer Inst* 1993;85(5):365-76. [published Online First: 1993/03/03]
- 16 583 62. Wojcicki TR, White SM, McAuley E. Assessing outcome expectations in older adults: the  
17 584 multidimensional outcome expectations for exercise scale. *J Gerontol B Psychol Sci Soc Sci*  
18 585 2009;64(1):33-40. doi: 10.1093/geronb/gbn032 [published Online First: 2009/02/03]
- 19 586 63. Greimel E, Bottomley A, Cull A, et al. An international field study of the reliability and validity of a  
20 587 disease-specific questionnaire module (the QLQ-OV28) in assessing the quality of life of patients  
21 588 with ovarian cancer. *Eur J Cancer* 2003;39(10):1402-8. [published Online First: 2003/06/27]
- 22 589 64. Postma TJ, Aaronson NK, Heimans JJ, et al. The development of an EORTC quality of life  
23 590 questionnaire to assess chemotherapy-induced peripheral neuropathy: the QLQ-CIPN20. *Eur J*  
24 591 *Cancer* 2005;41(8):1135-9. doi: 10.1016/j.ejca.2005.02.012 [published Online First: 2005/05/25]
- 25 592 65. Zigmond AS SR. The hospital anxiety and depression scale. *Acta Psychiatr Scand* 1983;67(6):361-  
26 593 70.
- 27 594 66. Buysse DJ, Reynolds CF, Monk TH, et al. The Pittsburgh sleep quality index: A new instrument for  
28 595 psychiatric practice and research. *Psychiatry Research* 1989;28(2):193-213. doi:  
29 596 [https://doi.org/10.1016/0165-1781\(89\)90047-4](https://doi.org/10.1016/0165-1781(89)90047-4)
- 30 597 67. Prado CM, Birdsall LA, Baracos VE. The emerging role of computerized tomography in assessing  
31 598 cancer cachexia. *Curr Opin Support Palliat Care* 2009;3(4):269-75. doi:  
32 599 10.1097/SPC.0b013e328331124a [published Online First: 2009/08/12]
- 33 600 68. Shen W, Punyanitya M, Wang Z, et al. Total body skeletal muscle and adipose tissue volumes:  
34 601 estimation from a single abdominal cross-sectional image. *J Appl Physiol (1985)* 2004;97(6):2333-8.  
35 602 doi: 10.1152/jappphysiol.00744.2004 [published Online First: 2004/08/18]
- 36 603 69. Bolanowski M, Nilsson BE. Assessment of human body composition using dual-energy x-ray  
37 604 absorptiometry and bioelectrical impedance analysis. *Medical science monitor : international medical*  
38 605 *journal of experimental and clinical research* 2001;7(5):1029-33. [published Online First: 2001/09/06]
- 39 606 70. Lane C, Huws-Thomas M, Hood K, et al. Measuring adaptations of motivational interviewing: the  
40 607 development and validation of the behavior change counseling index (BECCI). *Patient Educ Couns*  
41 608 2005;56(2):166-73. doi: 10.1016/j.pec.2004.01.003 [published Online First: 2005/01/18]
- 42 609 71. Czajkowska Z, Wang H, Hall NC, et al. Validation of the English and French versions of the Brief  
43 610 Health Care Climate Questionnaire. *Health Psychol Open* 2017;4(2):2055102917730675.
- 44 611 72. Boeije H. Analysis in qualitative research: Sage 2009.
- 45 612 73. Green J, Thorogood N. Qualitative methods for health research: Sage 2013.
- 46 613 74. Prochaska JO, Velicer WF. The transtheoretical model of health behavior change. *Am J Health*  
47 614 *Promot* 1997;12(1):38-48. doi: 10.4278/0890-1171-12.1.38 [published Online First: 1997/08/05]
- 48 615 75. Levesque CS, Williams GC, Elliot D, et al. Validating the theoretical structure of the Treatment Self-  
49 616 Regulation Questionnaire (TSRQ) across three different health behaviors. *Health Educ Res*  
50 617 2007;22(5):691-702. doi: 10.1093/her/cyl148 [published Online First: 2006/12/02]
- 51 618 76. Vrieling A, Visser A, Hoedjes M, et al. Increasing awareness and knowledge of lifestyle  
52 619 recommendations for cancer prevention in Lynch syndrome carriers: Randomized controlled trial.  
53 620 *Clin Genet* 2018;93(1):67-77. doi: 10.1111/cge.13076 [published Online First: 2017/06/21]
- 54 621 77. Demark-Wahnefried W, Peterson BL, Winer EP, et al. Changes in weight, body composition, and  
55 622 factors influencing energy balance among premenopausal breast cancer patients receiving adjuvant  
56 623 chemotherapy. *J Clin Oncol* 2001;19(9):2381-9. doi: 10.1200/jco.2001.19.9.2381 [published Online  
57 624 First: 2001/05/02]
- 58 625 78. Freedman RJ, Aziz N, Albanes D, et al. Weight and body composition changes during and after  
59 626 adjuvant chemotherapy in women with breast cancer. *J Clin Endocrinol Metab* 2004;89(5):2248-53.  
60 627 doi: 10.1210/jc.2003-031874 [published Online First: 2004/05/06]



- 1  
2  
3 628 79. Campbell KL, Van Patten CL, Neil SE, et al. Feasibility of a lifestyle intervention on body weight and  
4 629 serum biomarkers in breast cancer survivors with overweight and obesity. *J Acad Nutr Diet*  
5 630 2012;112(4):559-67. doi: 10.1016/j.jada.2011.10.022 [published Online First: 2012/06/20]  
6 631 80. Blauwhoff-Buskermolen S, Versteeg KS, de van der Schueren MA, et al. Loss of Muscle Mass  
7 632 During Chemotherapy Is Predictive for Poor Survival of Patients With Metastatic Colorectal Cancer.  
8 633 *J Clin Oncol* 2016;34(12):1339-44. doi: 10.1200/jco.2015.63.6043 [published Online First:  
9 634 2016/02/24]  
10 635 81. Battaglini C, Bottaro M, Dennehy C, et al. The effects of an individualized exercise intervention on  
11 636 body composition in breast cancer patients undergoing treatment. *Sao Paulo Med J* 2007;125(1):22-  
12 637 8. [published Online First: 2007/05/17]  
13 638 82. Jones LW, Liang Y, Pituskin EN, et al. Effect of exercise training on peak oxygen consumption in  
14 639 patients with cancer: a meta-analysis. *Oncologist* 2011;16(1):112-20. doi:  
15 640 10.1634/theoncologist.2010-0197 [published Online First: 2011/01/08]  
16 641 83. Persoon S, Chin AMJM, Buffart LM, et al. Randomized controlled trial on the effects of a supervised  
17 642 high intensity exercise program in patients with a hematologic malignancy treated with autologous  
18 643 stem cell transplantation: Results from the EXIST study. *PLoS One* 2017;12(7):e0181313.  
19 644 84. MacKinnon DP, Fairchild AJ, Fritz MS. Mediation analysis. *Annual review of psychology*  
20 645 2007;58:593-614. doi: 10.1146/annurev.psych.58.110405.085542 [published Online First:  
21 646 2006/09/14]  
22 647 85. Process evaluation for public health interventions and research. San Francisco, CA, US: Jossey-  
23 648 Bass 2002.

24 649

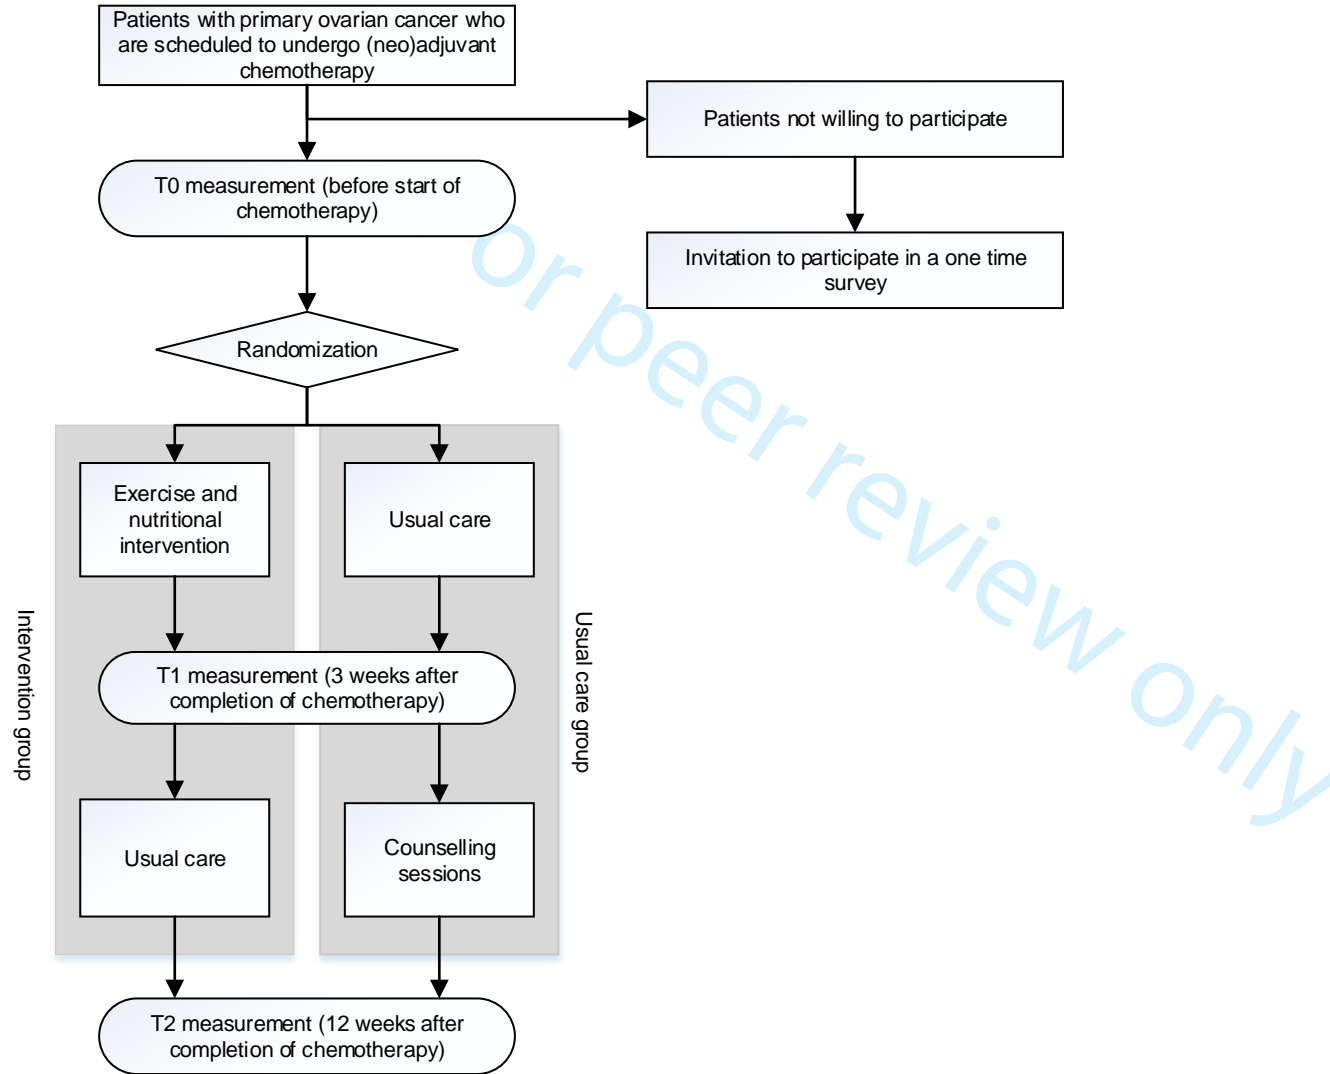

Supplementary table A: Overview of Behavior Change Techniques (BCT's) used to promote health behavior change in the PADOVA dietary intervention

| Theory                           | Construct               | BCT[1]                                               | Description of BCT                                                                                                                                                                                                                             |
|----------------------------------|-------------------------|------------------------------------------------------|------------------------------------------------------------------------------------------------------------------------------------------------------------------------------------------------------------------------------------------------|
| <i>Social Cognitive Theory</i>   |                         |                                                      |                                                                                                                                                                                                                                                |
|                                  | Self-efficacy           | Graded tasks                                         | To promote self-efficacy, the dietitian will stimulate the participant to set easy to perform and achievable individual goals, and will promote gradually making individual goals more difficult until the recommendation is met.              |
|                                  | Outcome expectations    | Comparative imagining of future outcomes             | The dietitian will prompt or advise the imagining and comparing of future outcomes of changed versus unchanged behavior.                                                                                                                       |
|                                  |                         | Vicarious consequences                               | The dietitian will prompt observation of the consequences (including rewards and punishments) for others when they perform the behavior.                                                                                                       |
|                                  | Goal setting            | Goal setting (outcomes of) behavior                  | Individual goals with regard to dietary intake/weight will be set by the participant in consultation with the dietitian.                                                                                                                       |
|                                  | Sociostructural factors | Problem solving                                      | The dietitian and patient discuss factors that could influence achieving each goal, as well as strategies to overcome possible barriers and/or strategies to increase facilitators to achieving each goal.                                     |
|                                  |                         | Social support (practical)                           | The dietitian gives advice on finding social support (e.g. practical help from family or friends) for behavior change in order to reach individual goals.                                                                                      |
|                                  |                         | Habit formation                                      | The dietitian will advise on rehearsal and repetition of the behavior in the same context repeatedly so that the context elicits the behavior.                                                                                                 |
|                                  |                         | Avoidance/reducing exposure to cues for the behavior | The dietitian will advise on how to avoid exposure to specific social and contextual/physical cues for the behavior, including changing daily/weekly routines.                                                                                 |
|                                  |                         | Restructuring the physical environment               | The dietitian will facilitate change or advise to change the <u>physical</u> environment in order to facilitate performance of the wanted behavior or create barriers to the unwanted behavior.                                                |
|                                  |                         | Restructuring the social environment                 | The dietitian will facilitate change or advise to change the <u>social</u> environment in order to facilitate performance of the wanted behavior or create barriers to the unwanted behavior.                                                  |
|                                  |                         | Information about antecedents                        | The dietitian will provide information about antecedents (social, environmental situations or events, emotions, cognitions) that reliably predict performance of the behavior.                                                                 |
|                                  |                         | Self-reward                                          | The dietitian will prompt self-praise or self-reward if and only if there has been effort and/or progress in performing the behavior.                                                                                                          |
|                                  |                         | Reduce negative emotions                             | The dietitian will advise on ways of reducing negative emotions to facilitate performance of the behavior (includes stress-management).                                                                                                        |
| <i>Motivational interviewing</i> |                         |                                                      |                                                                                                                                                                                                                                                |
|                                  |                         | Pros and cons                                        | The dietitian will advise to identify and compare reasons for wanting (pros) and not wanting (cons) to change the behavior (includes decisional balance).                                                                                      |
|                                  |                         | Comparative imagining of future outcomes             | The dietitian will prompt or advise the imagining and comparing of future outcomes of changed versus unchanged behavior.                                                                                                                       |
|                                  |                         | Social support (unspecified)                         | The dietitian will advise on and how to arrange social support (e.g., from friends, family, buddies) or non-contingent praise or reward for performance of the behavior. Includes encouragement and counselling when directed at the behavior. |

| Other |  |                                                                                                         |                                                                                                                                                                                                                                                                                                                   |
|-------|--|---------------------------------------------------------------------------------------------------------|-------------------------------------------------------------------------------------------------------------------------------------------------------------------------------------------------------------------------------------------------------------------------------------------------------------------|
|       |  | Credible source                                                                                         | Dietitian from hospital provides counselling.                                                                                                                                                                                                                                                                     |
|       |  | Feedback on behavior                                                                                    | The participant will receive feedback from the dietitian on diet quality, and on the extent to which they meet the World Cancer Research Fund (WCRF)/American Institute for Cancer Research (AICR) [2] recommendations and the protein-goals [3,4].                                                               |
|       |  | Feedback on outcomes behavior                                                                           | The participant will receive feedback from the dietitian on their weight, Body Mass Index, body composition.                                                                                                                                                                                                      |
|       |  | Information about health consequences                                                                   | The dietitian will inform the participant about the influence of lifestyle-related factors on the occurrence of cancer and about the potential positive effects of increased physical activity and a healthy diet (including the effect of habitual protein consumption during exercise) throughout chemotherapy. |
|       |  | Instruction on how to perform the behavior                                                              | The participant will receive information from the dietitian on the WCRF/AICR recommendations (leaflet).                                                                                                                                                                                                           |
|       |  | Adding objects to the environment; self-monitoring of behavior; self-monitoring of outcomes of behavior | The participant will receive a self-monitoring log from the dietitian in which they can log their weight and diet. They are encouraged to weekly log their weight, and to daily log their dietary intake, with flexibility to meet individual needs and preferences.                                              |
|       |  | Action planning                                                                                         | An action plan for each individual goal will be discussed by the participant and dietitian.                                                                                                                                                                                                                       |
|       |  | Discrepancy between current behavior and goal                                                           | The dietitian will point out potential discrepancies between patients' current behavior and each goal during each subsequent session.                                                                                                                                                                             |
|       |  | Review behavior goals/review outcome goals                                                              | The self-monitoring logs will be discussed with the oncology dietitian during every counselling visit to be able to monitor progress. Each goal will be reviewed and may be modified if necessary. Also, new goals may be set.                                                                                    |
|       |  | Social reward (positive reinforcement)                                                                  | The dietitian will congratulate the patient in case of success.                                                                                                                                                                                                                                                   |
|       |  | Verbal persuasion about capability                                                                      | The dietitian will tell the person that they can successfully perform the wanted behavior, arguing against self-doubts and asserting that they can and will succeed.                                                                                                                                              |

## REFERENCES

1. Michie S, Richardson M, Johnston M, et al. The behavior change technique taxonomy (v1) of 93 hierarchically clustered techniques: building an international consensus for the reporting of behavior change interventions. *Ann Behav Med* 2013;46(1):81-95. doi: 10.1007/s12160-013-9486-6 [published Online First: 2013/03/21]
2. World Cancer Research Fund / American Institute for Cancer Research. Diet, Nutrition, Physical Activity and Cancer: a Global Perspective. Continuous Update Project Expert report, 2018.
3. Nitenberg G, Raynard B. Nutritional support of the cancer patient: issues and dilemmas. *Crit Rev Oncol Hematol* 2000;34(3):137-68. [published Online First: 2000/06/06]
4. Arends J, Bachmann P, Baracos V, et al. ESPEN guidelines on nutrition in cancer patients. *Clin Nutr* 2016 doi: 10.1016/j.clnu.2016.07.015 [published Online First: 2016/09/18]

1  
2  
3  
4  
5  
6  
7  
8  
9  
10  
11  
12  
13  
14  
15  
16  
17  
18  
19  
20  
21  
22  
23  
24  
25  
26  
27  
28  
29  
30  
31  
32  
33  
34  
35  
36  
37  
38  
39  
40  
41  
42  
43  
44  
45  
46

For peer review only

Supplementary table B: Overview of the content of the PADOVA dietary counselling sessions

| Counselling session                | Content                                                                                                                                                                                                                                                                                                                                                                                                                                                                                                                                                                                                                                                                                                                                                                                                                                                                                                                                                                                                                                                                                                                                                                                                                                                                                                                                                                                                                                                                                                                                                                                                                                                                                                                                                                                                     |
|------------------------------------|-------------------------------------------------------------------------------------------------------------------------------------------------------------------------------------------------------------------------------------------------------------------------------------------------------------------------------------------------------------------------------------------------------------------------------------------------------------------------------------------------------------------------------------------------------------------------------------------------------------------------------------------------------------------------------------------------------------------------------------------------------------------------------------------------------------------------------------------------------------------------------------------------------------------------------------------------------------------------------------------------------------------------------------------------------------------------------------------------------------------------------------------------------------------------------------------------------------------------------------------------------------------------------------------------------------------------------------------------------------------------------------------------------------------------------------------------------------------------------------------------------------------------------------------------------------------------------------------------------------------------------------------------------------------------------------------------------------------------------------------------------------------------------------------------------------|
| First counselling session          | <ul style="list-style-type: none"> <li>- Introduction of dietitian and aim of dietary counselling sessions</li> <li>- Anthropometric measures               <ul style="list-style-type: none"> <li>o Current weight and weight history</li> <li>o Height</li> <li>o Body Mass Index</li> <li>o Body composition</li> </ul> </li> <li>- Dietary assessment               <ul style="list-style-type: none"> <li>o Nutrition-related illnesses or symptoms (e.g. reduced appetite, nausea, vomiting, gastrointestinal problems, chewing or swallowing difficulties)</li> <li>o Relevant social factors (e.g. social support)</li> <li>o Dietary analyses of current nutritional intake</li> <li>o Current exercise and physical activity level</li> </ul> </li> <li>- Assessment of energy [1,2] and protein [3,4] requirements using multiple formulas</li> <li>- Dietetic diagnosis (synthesized information from anthropometric measures and dietary assessment)</li> <li>- Provide feedback on patients' weight, body composition and dietary intake</li> <li>- Providing information about the influence of lifestyle and body weight related factors on the occurrence of cancer and about the potential positive effects of increased physical activity and a healthy diet (including the effects of habitual protein consumption during exercise) throughout chemotherapy.</li> <li>- Set individual goals and action plans to achieve goals (depending on current nutritional status)</li> <li>- Discussion of factors that could influence achieving each goal, as well as strategies to overcome possible barriers and/or strategies to increase facilitators</li> <li>- Hand out self-monitoring logs in which patients can log their weight, dietary intake and/or physical activity.</li> </ul> |
| Second – fifth counselling session | <ul style="list-style-type: none"> <li>- Anthropometric measures               <ul style="list-style-type: none"> <li>o Current weight and Body Mass Index</li> <li>o Body composition (every other counselling session)</li> </ul> </li> <li>- Dietary assessment (if changed)</li> <li>- Assessment of energy and protein requirements (if changed)</li> <li>- (Revision of) dietetic diagnosis</li> <li>- Discussion of filled in self-monitoring logs</li> <li>- Discussion of potential discrepancies between current behavior and each goal</li> <li>- Review and if necessary modification of goals and action plans</li> </ul>                                                                                                                                                                                                                                                                                                                                                                                                                                                                                                                                                                                                                                                                                                                                                                                                                                                                                                                                                                                                                                                                                                                                                                      |
| Last counselling session           | <ul style="list-style-type: none"> <li>- Same content as second to fifth counselling session</li> <li>- Discussion and encouragement of self-regulation strategies to be able to maintain adherence to the World Cancer Research Fund/American Institute for Cancer Research recommendations after the end of the intervention [5]</li> </ul>                                                                                                                                                                                                                                                                                                                                                                                                                                                                                                                                                                                                                                                                                                                                                                                                                                                                                                                                                                                                                                                                                                                                                                                                                                                                                                                                                                                                                                                               |

## REFERENCES

- 1
- 2
- 3
- 4
- 5 1. Roza AM, Shizgal HM. The Harris Benedict equation reevaluated: resting energy requirements and
- 6 the body cell mass. *Am J Clin Nutr* 1984;40(1):168-82. doi: 10.1093/ajcn/40.1.168 [published
- 7 Online First: 1984/07/01]
- 8 2. Energy and protein requirements. Report of a joint FAO/WHO/UNU Expert Consultation. *World Health*
- 9 *Organ Tech Rep Ser* 1985;724:1-206. [published Online First: 1985/01/01]
- 10 3. Nitenberg G, Raynard B. Nutritional support of the cancer patient: issues and dilemmas. *Crit Rev*
- 11 *Oncol Hematol* 2000;34(3):137-68. [published Online First: 2000/06/06]
- 12 4. Arends J, Bachmann P, Baracos V, et al. ESPEN guidelines on nutrition in cancer patients. *Clin Nutr*
- 13 2016 doi: 10.1016/j.clnu.2016.07.015 [published Online First: 2016/09/18]
- 14 5. World Cancer Research Fund / American Institute for Cancer Research. Diet, Nutrition, Physical
- 15 Activity and Cancer: a Global Perspective. Continuous Update Project Expert report, 2018.
- 16
- 17
- 18
- 19
- 20
- 21
- 22
- 23
- 24
- 25
- 26
- 27
- 28
- 29
- 30
- 31
- 32
- 33
- 34
- 35
- 36
- 37
- 38
- 39
- 40
- 41
- 42
- 43
- 44
- 45
- 46
- 47
- 48
- 49
- 50
- 51
- 52
- 53
- 54
- 55
- 56
- 57
- 58
- 59
- 60

For peer review only

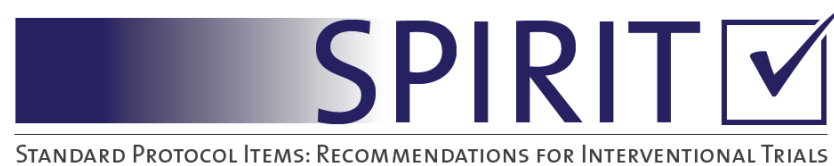

SPIRIT 2013 Checklist: Recommended items to address in a clinical trial protocol and related documents\*

| Section/item                      | Item No | Description                                                                                                                                                                                                                                                                              | Addressed on page number |
|-----------------------------------|---------|------------------------------------------------------------------------------------------------------------------------------------------------------------------------------------------------------------------------------------------------------------------------------------------|--------------------------|
| <b>Administrative information</b> |         |                                                                                                                                                                                                                                                                                          |                          |
| Title                             | 1       | Descriptive title identifying the study design, population, interventions, and, if applicable, trial acronym                                                                                                                                                                             | 1                        |
| Trial registration                | 2a      | Trial identifier and registry name. If not yet registered, name of intended registry                                                                                                                                                                                                     | 3                        |
|                                   | 2b      | All items from the World Health Organization Trial Registration Data Set                                                                                                                                                                                                                 | N/A                      |
| Protocol version                  | 3       | Date and version identifier                                                                                                                                                                                                                                                              | In MEC protocol          |
| Funding                           | 4       | Sources and types of financial, material, and other support                                                                                                                                                                                                                              | 18                       |
| Roles and responsibilities        | 5a      | Names, affiliations, and roles of protocol contributors                                                                                                                                                                                                                                  | 1, 18                    |
|                                   | 5b      | Name and contact information for the trial sponsor                                                                                                                                                                                                                                       | 1                        |
|                                   | 5c      | Role of study sponsor and funders, if any, in study design; collection, management, analysis, and interpretation of data; writing of the report; and the decision to submit the report for publication, including whether they will have ultimate authority over any of these activities | 18                       |
|                                   | 5d      | Composition, roles, and responsibilities of the coordinating centre, steering committee, endpoint adjudication committee, data management team, and other individuals or groups overseeing the trial, if applicable (see Item 21a for data monitoring committee)                         | N/A                      |



|    |                                                           |     |                                                                                                               |                 |
|----|-----------------------------------------------------------|-----|---------------------------------------------------------------------------------------------------------------|-----------------|
| 1  | <b>Introduction</b>                                       |     |                                                                                                               |                 |
| 2  |                                                           |     |                                                                                                               |                 |
| 3  | Background and                                            | 6a  | Description of research question and justification for undertaking the trial, including summary of relevant   | 4,5             |
| 4  | rationale                                                 |     | studies (published and unpublished) examining benefits and harms for each intervention                        |                 |
| 5  |                                                           |     |                                                                                                               |                 |
| 6  |                                                           | 6b  | Explanation for choice of comparators                                                                         | 4,5             |
| 7  |                                                           |     |                                                                                                               |                 |
| 8  | Objectives                                                | 7   | Specific objectives or hypotheses                                                                             | 4,5             |
| 9  |                                                           |     |                                                                                                               |                 |
| 10 | Trial design                                              | 8   | Description of trial design including type of trial (eg, parallel group, crossover, factorial, single group), | 5,6             |
| 11 |                                                           |     | allocation ratio, and framework (eg, superiority, equivalence, noninferiority, exploratory)                   |                 |
| 12 |                                                           |     |                                                                                                               |                 |
| 13 |                                                           |     |                                                                                                               |                 |
| 14 | <b>Methods: Participants, interventions, and outcomes</b> |     |                                                                                                               |                 |
| 15 |                                                           |     |                                                                                                               |                 |
| 16 | Study setting                                             | 9   | Description of study settings (eg, community clinic, academic hospital) and list of countries where data will | 6               |
| 17 |                                                           |     | be collected. Reference to where list of study sites can be obtained                                          |                 |
| 18 |                                                           |     |                                                                                                               |                 |
| 19 | Eligibility criteria                                      | 10  | Inclusion and exclusion criteria for participants. If applicable, eligibility criteria for study centres and  | 6               |
| 20 |                                                           |     | individuals who will perform the interventions (eg, surgeons, psychotherapists)                               |                 |
| 21 |                                                           |     |                                                                                                               |                 |
| 22 | Interventions                                             | 11a | Interventions for each group with sufficient detail to allow replication, including how and when they will be | 6-13            |
| 23 |                                                           |     | administered                                                                                                  |                 |
| 24 |                                                           |     |                                                                                                               |                 |
| 25 |                                                           | 11b | Criteria for discontinuing or modifying allocated interventions for a given trial participant (eg, drug dose  | 6-13            |
| 26 |                                                           |     | change in response to harms, participant request, or improving/worsening disease)                             |                 |
| 27 |                                                           |     |                                                                                                               |                 |
| 28 |                                                           | 11c | Strategies to improve adherence to intervention protocols, and any procedures for monitoring adherence        | 6-15            |
| 29 |                                                           |     | (eg, drug tablet return, laboratory tests)                                                                    |                 |
| 30 |                                                           |     |                                                                                                               |                 |
| 31 |                                                           | 11d | Relevant concomitant care and interventions that are permitted or prohibited during the trial                 | N/A             |
| 32 |                                                           |     |                                                                                                               |                 |
| 33 | Outcomes                                                  | 12  | Primary, secondary, and other outcomes, including the specific measurement variable (eg, systolic blood       | 13-16           |
| 34 |                                                           |     | pressure), analysis metric (eg, change from baseline, final value, time to event), method of aggregation (eg, |                 |
| 35 |                                                           |     | median, proportion), and time point for each outcome. Explanation of the clinical relevance of chosen         |                 |
| 36 |                                                           |     | efficacy and harm outcomes is strongly recommended                                                            |                 |
| 37 |                                                           |     |                                                                                                               |                 |
| 38 | Participant timeline                                      | 13  | Time schedule of enrolment, interventions (including any run-ins and washouts), assessments, and visits for   | 6-15, figure 1, |
| 39 |                                                           |     | participants. A schematic diagram is highly recommended (see Figure)                                          | table 3 and 4   |
| 40 |                                                           |     |                                                                                                               |                 |
| 41 |                                                           |     |                                                                                                               |                 |
| 42 |                                                           |     |                                                                                                               |                 |
| 43 |                                                           |     |                                                                                                               |                 |
| 44 |                                                           |     |                                                                                                               |                 |
| 45 |                                                           |     |                                                                                                               |                 |
| 46 |                                                           |     |                                                                                                               |                 |

|   |             |    |                                                                                                                                                                                       |                 |
|---|-------------|----|---------------------------------------------------------------------------------------------------------------------------------------------------------------------------------------|-----------------|
| 1 | Sample size | 14 | Estimated number of participants needed to achieve study objectives and how it was determined, including clinical and statistical assumptions supporting any sample size calculations | 16              |
| 2 |             |    |                                                                                                                                                                                       |                 |
| 3 |             |    |                                                                                                                                                                                       |                 |
| 4 | Recruitment | 15 | Strategies for achieving adequate participant enrolment to reach target sample size                                                                                                   | In MEC protocol |
| 5 |             |    |                                                                                                                                                                                       |                 |

### 6 **Methods: Assignment of interventions (for controlled trials)**

#### 7 Allocation:

|    |                    |     |                                                                                                                                                                                                                                                                                                                                                          |     |
|----|--------------------|-----|----------------------------------------------------------------------------------------------------------------------------------------------------------------------------------------------------------------------------------------------------------------------------------------------------------------------------------------------------------|-----|
| 8  |                    |     |                                                                                                                                                                                                                                                                                                                                                          |     |
| 9  |                    |     |                                                                                                                                                                                                                                                                                                                                                          |     |
| 10 | Sequence           | 16a | Method of generating the allocation sequence (eg, computer-generated random numbers), and list of any factors for stratification. To reduce predictability of a random sequence, details of any planned restriction (eg, blocking) should be provided in a separate document that is unavailable to those who enrol participants or assign interventions | 6   |
| 11 | generation         |     |                                                                                                                                                                                                                                                                                                                                                          |     |
| 12 |                    |     |                                                                                                                                                                                                                                                                                                                                                          |     |
| 13 |                    |     |                                                                                                                                                                                                                                                                                                                                                          |     |
| 14 |                    |     |                                                                                                                                                                                                                                                                                                                                                          |     |
| 15 |                    |     |                                                                                                                                                                                                                                                                                                                                                          |     |
| 16 | Allocation         | 16b | Mechanism of implementing the allocation sequence (eg, central telephone; sequentially numbered, opaque, sealed envelopes), describing any steps to conceal the sequence until interventions are assigned                                                                                                                                                | 6   |
| 17 | concealment        |     |                                                                                                                                                                                                                                                                                                                                                          |     |
| 18 | mechanism          |     |                                                                                                                                                                                                                                                                                                                                                          |     |
| 19 |                    |     |                                                                                                                                                                                                                                                                                                                                                          |     |
| 20 | Implementation     | 16c | Who will generate the allocation sequence, who will enrol participants, and who will assign participants to interventions                                                                                                                                                                                                                                | 6   |
| 21 |                    |     |                                                                                                                                                                                                                                                                                                                                                          |     |
| 22 |                    |     |                                                                                                                                                                                                                                                                                                                                                          |     |
| 23 |                    |     |                                                                                                                                                                                                                                                                                                                                                          |     |
| 24 | Blinding (masking) | 17a | Who will be blinded after assignment to interventions (eg, trial participants, care providers, outcome assessors, data analysts), and how                                                                                                                                                                                                                | 13  |
| 25 |                    |     |                                                                                                                                                                                                                                                                                                                                                          |     |
| 26 |                    |     |                                                                                                                                                                                                                                                                                                                                                          |     |
| 27 |                    | 17b | If blinded, circumstances under which unblinding is permissible, and procedure for revealing a participant's allocated intervention during the trial                                                                                                                                                                                                     | N/A |
| 28 |                    |     |                                                                                                                                                                                                                                                                                                                                                          |     |
| 29 |                    |     |                                                                                                                                                                                                                                                                                                                                                          |     |
| 30 |                    |     |                                                                                                                                                                                                                                                                                                                                                          |     |

### 31 **Methods: Data collection, management, and analysis**

|    |                 |     |                                                                                                                                                                                                                                                                                                                                                                                                              |       |
|----|-----------------|-----|--------------------------------------------------------------------------------------------------------------------------------------------------------------------------------------------------------------------------------------------------------------------------------------------------------------------------------------------------------------------------------------------------------------|-------|
| 32 |                 |     |                                                                                                                                                                                                                                                                                                                                                                                                              |       |
| 33 | Data collection | 18a | Plans for assessment and collection of outcome, baseline, and other trial data, including any related processes to promote data quality (eg, duplicate measurements, training of assessors) and a description of study instruments (eg, questionnaires, laboratory tests) along with their reliability and validity, if known. Reference to where data collection forms can be found, if not in the protocol | 13-16 |
| 34 | methods         |     |                                                                                                                                                                                                                                                                                                                                                                                                              |       |
| 35 |                 |     |                                                                                                                                                                                                                                                                                                                                                                                                              |       |
| 36 |                 |     |                                                                                                                                                                                                                                                                                                                                                                                                              |       |
| 37 |                 |     |                                                                                                                                                                                                                                                                                                                                                                                                              |       |
| 38 |                 | 18b | Plans to promote participant retention and complete follow-up, including list of any outcome data to be collected for participants who discontinue or deviate from intervention protocols                                                                                                                                                                                                                    | 13-16 |
| 39 |                 |     |                                                                                                                                                                                                                                                                                                                                                                                                              |       |
| 40 |                 |     |                                                                                                                                                                                                                                                                                                                                                                                                              |       |
| 41 |                 |     |                                                                                                                                                                                                                                                                                                                                                                                                              |       |
| 42 |                 |     |                                                                                                                                                                                                                                                                                                                                                                                                              |       |

|    |                                 |     |                                                                                                                                                                                                                                                                                                                                       |                                             |
|----|---------------------------------|-----|---------------------------------------------------------------------------------------------------------------------------------------------------------------------------------------------------------------------------------------------------------------------------------------------------------------------------------------|---------------------------------------------|
| 1  | Data management                 | 19  | Plans for data entry, coding, security, and storage, including any related processes to promote data quality (eg, double data entry; range checks for data values). Reference to where details of data management procedures can be found, if not in the protocol                                                                     | 16-17                                       |
| 2  |                                 |     |                                                                                                                                                                                                                                                                                                                                       |                                             |
| 3  |                                 |     |                                                                                                                                                                                                                                                                                                                                       |                                             |
| 4  |                                 |     |                                                                                                                                                                                                                                                                                                                                       |                                             |
| 5  | Statistical methods             | 20a | Statistical methods for analysing primary and secondary outcomes. Reference to where other details of the statistical analysis plan can be found, if not in the protocol                                                                                                                                                              | 16-17                                       |
| 6  |                                 |     |                                                                                                                                                                                                                                                                                                                                       |                                             |
| 7  |                                 |     |                                                                                                                                                                                                                                                                                                                                       |                                             |
| 8  |                                 | 20b | Methods for any additional analyses (eg, subgroup and adjusted analyses)                                                                                                                                                                                                                                                              | 16-17                                       |
| 9  |                                 |     |                                                                                                                                                                                                                                                                                                                                       |                                             |
| 10 |                                 | 20c | Definition of analysis population relating to protocol non-adherence (eg, as randomised analysis), and any statistical methods to handle missing data (eg, multiple imputation)                                                                                                                                                       | 16-17                                       |
| 11 |                                 |     |                                                                                                                                                                                                                                                                                                                                       |                                             |
| 12 |                                 |     |                                                                                                                                                                                                                                                                                                                                       |                                             |
| 13 |                                 |     |                                                                                                                                                                                                                                                                                                                                       |                                             |
| 14 | <b>Methods: Monitoring</b>      |     |                                                                                                                                                                                                                                                                                                                                       |                                             |
| 15 |                                 |     |                                                                                                                                                                                                                                                                                                                                       |                                             |
| 16 | Data monitoring                 | 21a | Composition of data monitoring committee (DMC); summary of its role and reporting structure; statement of whether it is independent from the sponsor and competing interests; and reference to where further details about its charter can be found, if not in the protocol. Alternatively, an explanation of why a DMC is not needed | Low risk study, therefore DMC is not needed |
| 17 |                                 |     |                                                                                                                                                                                                                                                                                                                                       |                                             |
| 18 |                                 |     |                                                                                                                                                                                                                                                                                                                                       |                                             |
| 19 |                                 |     |                                                                                                                                                                                                                                                                                                                                       |                                             |
| 20 |                                 |     |                                                                                                                                                                                                                                                                                                                                       |                                             |
| 21 |                                 |     |                                                                                                                                                                                                                                                                                                                                       |                                             |
| 22 |                                 | 21b | Description of any interim analyses and stopping guidelines, including who will have access to these interim results and make the final decision to terminate the trial                                                                                                                                                               | N/A                                         |
| 23 |                                 |     |                                                                                                                                                                                                                                                                                                                                       |                                             |
| 24 |                                 |     |                                                                                                                                                                                                                                                                                                                                       |                                             |
| 25 | Harms                           | 22  | Plans for collecting, assessing, reporting, and managing solicited and spontaneously reported adverse events and other unintended effects of trial interventions or trial conduct                                                                                                                                                     | N/A                                         |
| 26 |                                 |     |                                                                                                                                                                                                                                                                                                                                       |                                             |
| 27 |                                 |     |                                                                                                                                                                                                                                                                                                                                       |                                             |
| 28 | Auditing                        | 23  | Frequency and procedures for auditing trial conduct, if any, and whether the process will be independent from investigators and the sponsor                                                                                                                                                                                           | N/A                                         |
| 29 |                                 |     |                                                                                                                                                                                                                                                                                                                                       |                                             |
| 30 |                                 |     |                                                                                                                                                                                                                                                                                                                                       |                                             |
| 31 |                                 |     |                                                                                                                                                                                                                                                                                                                                       |                                             |
| 32 | <b>Ethics and dissemination</b> |     |                                                                                                                                                                                                                                                                                                                                       |                                             |
| 33 |                                 |     |                                                                                                                                                                                                                                                                                                                                       |                                             |
| 34 | Research ethics approval        | 24  | Plans for seeking research ethics committee/institutional review board (REC/IRB) approval                                                                                                                                                                                                                                             | 5-6                                         |
| 35 |                                 |     |                                                                                                                                                                                                                                                                                                                                       |                                             |
| 36 |                                 |     |                                                                                                                                                                                                                                                                                                                                       |                                             |
| 37 | Protocol amendments             | 25  | Plans for communicating important protocol modifications (eg, changes to eligibility criteria, outcomes, analyses) to relevant parties (eg, investigators, REC/IRBs, trial participants, trial registries, journals, regulators)                                                                                                      | In MEC protocol                             |
| 38 |                                 |     |                                                                                                                                                                                                                                                                                                                                       |                                             |
| 39 |                                 |     |                                                                                                                                                                                                                                                                                                                                       |                                             |
| 40 |                                 |     |                                                                                                                                                                                                                                                                                                                                       |                                             |
| 41 |                                 |     |                                                                                                                                                                                                                                                                                                                                       |                                             |
| 42 |                                 |     |                                                                                                                                                                                                                                                                                                                                       |                                             |

|    |                               |     |                                                                                                                                                                                                                                                                                     |                               |
|----|-------------------------------|-----|-------------------------------------------------------------------------------------------------------------------------------------------------------------------------------------------------------------------------------------------------------------------------------------|-------------------------------|
| 1  | Consent or assent             | 26a | Who will obtain informed consent or assent from potential trial participants or authorised surrogates, and how (see Item 32)                                                                                                                                                        | In MEC protocol               |
| 2  |                               |     |                                                                                                                                                                                                                                                                                     |                               |
| 3  |                               |     |                                                                                                                                                                                                                                                                                     |                               |
| 4  |                               | 26b | Additional consent provisions for collection and use of participant data and biological specimens in ancillary studies, if applicable                                                                                                                                               | N/A                           |
| 5  |                               |     |                                                                                                                                                                                                                                                                                     |                               |
| 6  |                               |     |                                                                                                                                                                                                                                                                                     |                               |
| 7  | Confidentiality               | 27  | How personal information about potential and enrolled participants will be collected, shared, and maintained in order to protect confidentiality before, during, and after the trial                                                                                                | In MEC protocol               |
| 8  |                               |     |                                                                                                                                                                                                                                                                                     |                               |
| 9  |                               |     |                                                                                                                                                                                                                                                                                     |                               |
| 10 | Declaration of interests      | 28  | Financial and other competing interests for principal investigators for the overall trial and each study site                                                                                                                                                                       | 18                            |
| 11 |                               |     |                                                                                                                                                                                                                                                                                     |                               |
| 12 |                               |     |                                                                                                                                                                                                                                                                                     |                               |
| 13 | Access to data                | 29  | Statement of who will have access to the final trial dataset, and disclosure of contractual agreements that limit such access for investigators                                                                                                                                     | In MEC protocol               |
| 14 |                               |     |                                                                                                                                                                                                                                                                                     |                               |
| 15 |                               |     |                                                                                                                                                                                                                                                                                     |                               |
| 16 | Ancillary and post-trial care | 30  | Provisions, if any, for ancillary and post-trial care, and for compensation to those who suffer harm from trial participation                                                                                                                                                       | In MEC protocol               |
| 17 |                               |     |                                                                                                                                                                                                                                                                                     |                               |
| 18 |                               |     |                                                                                                                                                                                                                                                                                     |                               |
| 19 |                               |     |                                                                                                                                                                                                                                                                                     |                               |
| 20 | Dissemination policy          | 31a | Plans for investigators and sponsor to communicate trial results to participants, healthcare professionals, the public, and other relevant groups (eg, via publication, reporting in results databases, or other data sharing arrangements), including any publication restrictions | In MEC protocol               |
| 21 |                               |     |                                                                                                                                                                                                                                                                                     |                               |
| 22 |                               |     |                                                                                                                                                                                                                                                                                     |                               |
| 23 |                               |     |                                                                                                                                                                                                                                                                                     |                               |
| 24 |                               | 31b | Authorship eligibility guidelines and any intended use of professional writers                                                                                                                                                                                                      | N/A                           |
| 25 |                               |     |                                                                                                                                                                                                                                                                                     |                               |
| 26 |                               | 31c | Plans, if any, for granting public access to the full protocol, participant-level dataset, and statistical code                                                                                                                                                                     | N/A                           |
| 27 |                               |     |                                                                                                                                                                                                                                                                                     |                               |
| 28 |                               |     |                                                                                                                                                                                                                                                                                     |                               |
| 29 | <b>Appendices</b>             |     |                                                                                                                                                                                                                                                                                     |                               |
| 30 |                               |     |                                                                                                                                                                                                                                                                                     |                               |
| 31 | Informed consent materials    | 32  | Model consent form and other related documentation given to participants and authorised surrogates                                                                                                                                                                                  | See supplementary files C & D |
| 32 |                               |     |                                                                                                                                                                                                                                                                                     |                               |
| 33 |                               |     |                                                                                                                                                                                                                                                                                     |                               |
| 34 |                               |     |                                                                                                                                                                                                                                                                                     |                               |
| 35 | Biological specimens          | 33  | Plans for collection, laboratory evaluation, and storage of biological specimens for genetic or molecular analysis in the current trial and for future use in ancillary studies, if applicable                                                                                      | N/A                           |
| 36 |                               |     |                                                                                                                                                                                                                                                                                     |                               |
| 37 |                               |     |                                                                                                                                                                                                                                                                                     |                               |

\*It is strongly recommended that this checklist be read in conjunction with the SPIRIT 2013 Explanation & Elaboration for important clarification on the items. Amendments to the protocol should be tracked and dated. The SPIRIT checklist is copyrighted by the SPIRIT Group under the Creative Commons "[Attribution-NonCommercial-NoDerivs 3.0 Unported](https://creativecommons.org/licenses/by-nc-nd/3.0/)" license.

1  
2  
3  
4  
5  
6  
7  
8  
9  
10  
11  
12  
13  
14  
15  
16  
17  
18  
19  
20  
21  
22  
23  
24  
25  
26  
27  
28  
29  
30  
31  
32  
33  
34  
35  
36  
37  
38  
39  
40  
41  
42  
43  
44  
45  
46

For peer review only
