# Supplementary material for: Rationale and study protocol of the Physical Activity and Dietary intervention in women with OVArian cancer (PADOVA) study: a randomised controlled trial to evaluate effectiveness of a tailored exercise and dietary intervention on body composition, physical function and fatigue in women with ovarian cancer undergoing chemotherapy
Source: PubMed Central journal article supplement (PMC7643503; doi:10.1136/bmjopen-2020-036854), 2020-11-04
Supplement: bmjopen-2020-036854supp002.pdf [file bmjopen-2020-036854supp002.pdf]

Supplementary table B: Overview of the content of the PADOVA dietary counselling sessions

| Counselling session                | Content                                                                                                                                                                                                                                                                                                                                                                                                                                                                                                                                                                                                                                                                                                                                                                                                                                                                                                                                                                                                                                                                                                                                                                                                                                                                                                                                                                                                                                                                                                                                                                                                                                                                                                                                                                                                     |
|------------------------------------|-------------------------------------------------------------------------------------------------------------------------------------------------------------------------------------------------------------------------------------------------------------------------------------------------------------------------------------------------------------------------------------------------------------------------------------------------------------------------------------------------------------------------------------------------------------------------------------------------------------------------------------------------------------------------------------------------------------------------------------------------------------------------------------------------------------------------------------------------------------------------------------------------------------------------------------------------------------------------------------------------------------------------------------------------------------------------------------------------------------------------------------------------------------------------------------------------------------------------------------------------------------------------------------------------------------------------------------------------------------------------------------------------------------------------------------------------------------------------------------------------------------------------------------------------------------------------------------------------------------------------------------------------------------------------------------------------------------------------------------------------------------------------------------------------------------|
| First counselling session          | <ul style="list-style-type: none"> <li>- Introduction of dietitian and aim of dietary counselling sessions</li> <li>- Anthropometric measures               <ul style="list-style-type: none"> <li>o Current weight and weight history</li> <li>o Height</li> <li>o Body Mass Index</li> <li>o Body composition</li> </ul> </li> <li>- Dietary assessment               <ul style="list-style-type: none"> <li>o Nutrition-related illnesses or symptoms (e.g. reduced appetite, nausea, vomiting, gastrointestinal problems, chewing or swallowing difficulties)</li> <li>o Relevant social factors (e.g. social support)</li> <li>o Dietary analyses of current nutritional intake</li> <li>o Current exercise and physical activity level</li> </ul> </li> <li>- Assessment of energy [1,2] and protein [3,4] requirements using multiple formulas</li> <li>- Dietetic diagnosis (synthesized information from anthropometric measures and dietary assessment)</li> <li>- Provide feedback on patients' weight, body composition and dietary intake</li> <li>- Providing information about the influence of lifestyle and body weight related factors on the occurrence of cancer and about the potential positive effects of increased physical activity and a healthy diet (including the effects of habitual protein consumption during exercise) throughout chemotherapy.</li> <li>- Set individual goals and action plans to achieve goals (depending on current nutritional status)</li> <li>- Discussion of factors that could influence achieving each goal, as well as strategies to overcome possible barriers and/or strategies to increase facilitators</li> <li>- Hand out self-monitoring logs in which patients can log their weight, dietary intake and/or physical activity.</li> </ul> |
| Second – fifth counselling session | <ul style="list-style-type: none"> <li>- Anthropometric measures               <ul style="list-style-type: none"> <li>o Current weight and Body Mass Index</li> <li>o Body composition (every other counselling session)</li> </ul> </li> <li>- Dietary assessment (if changed)</li> <li>- Assessment of energy and protein requirements (if changed)</li> <li>- (Revision of) dietetic diagnosis</li> <li>- Discussion of filled in self-monitoring logs</li> <li>- Discussion of potential discrepancies between current behavior and each goal</li> <li>- Review and if necessary modification of goals and action plans</li> </ul>                                                                                                                                                                                                                                                                                                                                                                                                                                                                                                                                                                                                                                                                                                                                                                                                                                                                                                                                                                                                                                                                                                                                                                      |
| Last counselling session           | <ul style="list-style-type: none"> <li>- Same content as second to fifth counselling session</li> <li>- Discussion and encouragement of self-regulation strategies to be able to maintain adherence to the World Cancer Research Fund/American Institute for Cancer Research recommendations after the end of the intervention [5]</li> </ul>                                                                                                                                                                                                                                                                                                                                                                                                                                                                                                                                                                                                                                                                                                                                                                                                                                                                                                                                                                                                                                                                                                                                                                                                                                                                                                                                                                                                                                                               |

## REFERENCES

1. Roza AM, Shizgal HM. The Harris Benedict equation reevaluated: resting energy requirements and the body cell mass. *Am J Clin Nutr* 1984;40(1):168-82. doi: 10.1093/ajcn/40.1.168 [published Online First: 1984/07/01]
2. Energy and protein requirements. Report of a joint FAO/WHO/UNU Expert Consultation. *World Health Organ Tech Rep Ser* 1985;724:1-206. [published Online First: 1985/01/01]
3. Nitenberg G, Raynard B. Nutritional support of the cancer patient: issues and dilemmas. *Crit Rev Oncol Hematol* 2000;34(3):137-68. [published Online First: 2000/06/06]
4. Arends J, Bachmann P, Baracos V, et al. ESPEN guidelines on nutrition in cancer patients. *Clin Nutr* 2016 doi: 10.1016/j.clnu.2016.07.015 [published Online First: 2016/09/18]
5. World Cancer Research Fund / American Institute for Cancer Research. Diet, Nutrition, Physical Activity and Cancer: a Global Perspective. Continuous Update Project Expert report, 2018.
